# Supplementary material for: Enabling global analysis of protein citrullination and homocitrullination via biotin thiol tag-assisted mass spectrometry
Source: Research Square preprint supplement (doi:10.21203/rs.3.rs-215281/v1), 2021-02-17
Supplement: Supplementary file 1 [file 963e39718c24eda195361f36.xlsx]

## Sheet: All IDs
Protein	Position	Protein name	Localization prob	Score	Biotin-cit Probabilities
A2AG50	318	MAP7 domain-containing protein 2	0.888361	142.85	VATSAASGGHGSPLR(0.888)R(0.112)
A2AG50	319	MAP7 domain-containing protein 2	0.950834	143.4	VATSAASGGHGSPLR(0.049)R(0.951)
A2AJI0	383	MAP7 domain-containing protein 1	0.83523	62.589	SASASPLTPCSAPR(0.165)SAHR(0.835)
A2ASS6	19180	Titin	1	62.589	VAAENQYGR(1)GPFVETPKPIK
A2ASS6	19790	Titin	1	71.623	NSSGHAQGSAIVNVLDR(1)PGPCQNLK
A2ASS6	24001	Titin	1	89.358	EACR(1)EDVGHYTVK
A2ASS6	34003	Titin	0.999987	115.57	EEEELLRPVTTTQR(1)
A2ASS6	4171	Titin	1	118.72	IDVQGGR(1)DHLSDAQK
A2ASS6	467	Titin	1	152.47	TTTTAVHIQPAQEQAR(1)K
B5X0G2	140	Major urinary protein 17	0.999999	102.21	DGETFQLMGLYGR(1)EPDLSSDIKER
B5X0G2	78	Major urinary protein 17	1	137.64	VHTVR(1)DEECSELSMVADK
B5X0G2	174	Major urinary protein 17	1	152.11	ENIIDLSNANR(1)
B9EKR1	447	Receptor-type tyrosine-protein phosphatase zeta	0.805776	74.905	DNEEDTGLNPGR(0.806)DSVTNQIR(0.194)K
B9EKR1	455	Receptor-type tyrosine-protein phosphatase zeta	0.947755	111.65	DNEEDTGLNPGR(0.052)DSVTNQIR(0.948)K
D3YVF0	279	A-kinase anchor protein 5	1	96.098	SVTSAAPPSPATTHQHSLEEPSNGIR(1)
D3Z6P0	153	Protein disulfide-isomerase A2	1	55.588	R(1)VGPSATHLEDEEGVQALMAK
E9PVA8	962	eIF-2-alpha kinase activator GCN1	1	79.467	AVSLLHTHTIPSR(1)VGK
E9Q8I9	1937	Protein furry homolog	1	109.84	NSDLFTVLSR(1)SSSPDLSSSSK
E9QAT4	1240	Protein transport protein Sec16A	0.768116	65.428	YSEPER(0.22)PSSR(0.768)ASHYSDQLAPR(0.012)
E9QAT4	400	Protein transport protein Sec16A	0.999992	180.97	RLNLDSFSSTSR(1)LGHPPPPGASGVYQAFPR
F6SEU4	1082	Ras/Rap GTPase-activating protein SynGAP	0.999989	73.771	SQQLTVSAAQKPR(1)PSSGNLLQSPEPSYGPARPR
G5E829	320	Calcium-transporting ATPase	1	116.24	KQDGAIENR(1)
G5E829	716	Calcium-transporting ATPase	1	122.33	MVTGDNINTAR(1)
O08529	77	Calpain-2 catalytic subunit	0.999988	52.814	R(1)PTEICADPQFIIGGATR
O08553	227	Dihydropyrimidinase-related protein 2	0.999976	84.152	ILDLGITGPEGHVLSR(1)PEEVEAEAVNR
O08553	557	Dihydropyrimidinase-related protein 2	0.991896	117.18	R(0.008)TTQR(0.992)IVAPPGGR
O08553	553	Dihydropyrimidinase-related protein 2	0.895636	131.94	NLHQSGFSLSGAQIDDNIPR(0.104)R(0.896)
O08553	552	Dihydropyrimidinase-related protein 2	1	158.65	NLHQSGFSLSGAQIDDNIPR(1)
O08553	268	Dihydropyrimidinase-related protein 2	1	179.35	SAAEVIAQAR(1)K
O08553	361	Dihydropyrimidinase-related protein 2	1	184.78	DNFTLIPEGTNGTEER(1)
O08553	238	Dihydropyrimidinase-related protein 2	1	267.56	ILDLGITGPEGHVLSRPEEVEAEAVNR(1)
O08553	440	Dihydropyrimidinase-related protein 2	1	301.93	THNSALEYNIFEGMECR(1)
O08585	128	Clathrin light chain A	1	130.2	LEALDANSR(1)K
O08599	467	Syntaxin-binding protein 1	1	115.91	ER(1)ISEQTYQLSR
O08599	305	Syntaxin-binding protein 1	1	138.55	HIAEVSQEVTR(1)
O08599	477	Syntaxin-binding protein 1	1	232.83	ISEQTYQLSR(1)
O08638	809	Myosin-11	1	155.48	R(1)QQQLTAMK
O08717	89	Inhibin beta E chain	1	90.793	LQPKSMVPGNR(1)
O09111	127	NADH dehydrogenase [ubiquinone] 1 beta subcomplex subunit 11, mitochondrial	1	59.339	YR(1)EVNGLPIMESNYFDPSK
O09161	48	Calsequestrin-2	1	128.88	R(1)YDLLCLYYHEPVSSDK
O35098	519	Dihydropyrimidinase-related protein 4	1	86.449	GLYDGPVHEVMLPAKPGSGTQAR(1)
O35098	238	Dihydropyrimidinase-related protein 4	1	87.739	RLLEQGITGPEGHVLSHPEEVEAEAVYR(1)
O35129	123	Prohibitin-2	1	74.029	VLSRPNAQELPSMYQR(1)
O35129	111	Prohibitin-2	1	97.49	VLSR(1)PNAQELPSMYQR
O35215	75	D-dopachrome decarboxylase	1	47.73	STEPCAHLLVSSIGVVGTAEQNR(1)
O35459	73	Delta(3,5)-Delta(2,4)-dienoyl-CoA isomerase, mitochondrial	1	139.58	HVLHVQLNR(1)PEK
O35488	408	Very long-chain acyl-CoA synthetase	1	87.654	DEPVR(1)DANGYCIKVPK
O35488	329	Very long-chain acyl-CoA synthetase	1	89.468	YLCNTPQKPNDR(1)DHK
O35490	318	Betaine--homocysteine S-methyltransferase 1	1	61.477	AIAEELAPER(1)GFLPPASEK
O35490	361	Betaine--homocysteine S-methyltransferase 1	0.993619	64.27	IASGR(0.994)PYNPSMSR(0.006)PDAWGVTK
O35490	204	Betaine--homocysteine S-methyltransferase 1	1	76.029	ASGKPVAATMCIGPEGDLHGVPPGECAVR(1)
O35490	308	Betaine--homocysteine S-methyltransferase 1	1	80.738	YIGGCCGFEPYHIR(1)
O35490	108	Betaine--homocysteine S-methyltransferase 1	1	137.62	VNEAACDIAR(1)
O35490	395	Betaine--homocysteine S-methyltransferase 1	1	183.03	EATTEQQLR(1)
O35566	133	CD151 antigen	1	71.853	R(1)YHQSGHEGVSSAVDK
O35737	114	Heterogeneous nuclear ribonucleoprotein H	1	66.636	HTGPNSPDTANDGFVR(1)
O35945	476	Aldehyde dehydrogenase, cytosolic 1	1	152.88	MSGNGR(1)ELGEHGLYEYTELK
O54782	715	Epididymis-specific alpha-mannosidase	0.864976	70.41	IEQQYR(0.865)VGPLDLNR(0.135)
O54782	723	Epididymis-specific alpha-mannosidase	0.963702	83.37	IEQQYR(0.036)VGPLDLNR(0.964)
O54931	263	A-kinase anchor protein 2	1	76.378	TIEEQLDEEHLESHR(1)K
O55131	41	Septin-7	1	98.543	NLEGYVGFANLPNQVYR(1)K
O55131	424	Septin-7	1	164.9	ILEQQNSSR(1)
O55131	380	Septin-7	0.989801	166.69	DSEAELQR(0.99)R(0.01)
O55142	22	60S ribosomal protein L35a	1	118.52	NQR(1)EHTALLK
O55143	505	Sarcoplasmic/endoplasmic reticulum calcium ATPase 2	1	91.657	SMSVYCTPNKPSR(1)
O55143	666	Sarcoplasmic/endoplasmic reticulum calcium ATPase 2	1	140.2	EFDELSPSAQR(1)
O55143	246	Sarcoplasmic/endoplasmic reticulum calcium ATPase 2	1	154.84	IRDEMVATEQER(1)TPLQQK
O55143	365	Sarcoplasmic/endoplasmic reticulum calcium ATPase 2	1	157.68	TGTLTTNQMSVCR(1)
O70318	163	Band 4.1-like protein 2	1	86.497	SSVETQPAEEVR(1)K
O70468	941	Myosin-binding protein C, cardiac-type	0.999935	45.267	VR(1)AHNVAGPGGPIVTKEPVTVQEILQRPR
O70468	213	Myosin-binding protein C, cardiac-type	1	86.497	VGQHLQLHDSYDR(1)
O70468	968	Myosin-binding protein C, cardiac-type	0.816805	239.41	AHNVAGPGGPIVTKEPVTVQEILQR(0.183)PR(0.817)
O70468	966	Myosin-binding protein C, cardiac-type	0.898008	291.58	AHNVAGPGGPIVTKEPVTVQEILQR(0.898)PR(0.102)
O88342	330	WD repeat-containing protein 1	1	77.746	SIQCLTVHR(1)NGGK
O88343	251	Electrogenic sodium bicarbonate cotransporter 1	1	114.96	MFSNPDNGSPAMTHR(1)
O88569	213	Heterogeneous nuclear ribonucleoproteins A2/B1	0.997534	70.67	SGR(0.002)GGNFGFGDSR(0.998)GGGGNFGPGPGSNFR
O88569	325	Heterogeneous nuclear ribonucleoproteins A2/B1	1	71.024	SGNFGGSR(1)NMGGPYGGGNYGPGGSGGSGGYGGR
O88569	228	Heterogeneous nuclear ribonucleoproteins A2/B1	0.999328	86.191	GGGGNFGPGPGSNFR(0.999)GGSDGYGSGR(0.001)
O88569	185	Heterogeneous nuclear ribonucleoproteins A2/B1	1	115.1	YHTINGHNAEVR(1)K
O88569	203	Heterogeneous nuclear ribonucleoproteins A2/B1	1	137.45	SGR(1)GGNFGFGDSR
O88665	563	Bromodomain-containing protein 7	1	147.62	ELQEAQNER(1)
O88735	266	Ensconsin	0.999999	114.27	AAHSR(1)NPVDRPK
O88735	212	Ensconsin	0.952772	147.67	RLSSSSATLLNSPDR(0.953)AR(0.047)
O88737	545	Protein bassoon	0.999999	64.685	RLLEGSLGEPAPLPLPTPQQPPAGVPHR(1)
O88737	3605	Protein bassoon	1	112.36	FR(1)HHGGHTVSSSQK
O88935	556	Synapsin-1	0.862173	56.474	QSRPVAGGPGAPPAAR(0.138)PPASPSPQR(0.862)
O88935	587	Synapsin-1	0.999971	59.567	ASGAPPGGQQR(1)QGPPQKPPGPAGPTR
O88935	680	Synapsin-1	1	96.77	SQSLTNAFNLPEPAPPR(1)PSLSQDEVK
O88935	534	Synapsin-1	1	97.387	QSR(1)PVAGGPGAPPAARPPASPSPQR
O88935	352	Synapsin-1	1	121.33	TNTGSAMLEQIAMSDR(1)YK
O88935	430	Synapsin-1	1	203.82	DASPGR(1)GSHSQSSSPGALTLGR
O88978	10	Protein tilB homolog	0.989569	169.41	ITEDLIR(0.99)R(0.01)
O88990	59	Alpha-actinin-3	1	82.651	TFTAWCNSHLR(1)K
O88990	463	Alpha-actinin-3	1	164.02	HEAFESDLAAHQDR(1)
O88990	73	Alpha-actinin-3	1	198.24	AGTQIENIEEDFR(1)NGLK
O89086	128	Putative RNA-binding protein 3	0.932295	85.062	YDSRPGGYGYGYGR(0.932)SR(0.068)
P00329	114	Alcohol dehydrogenase 1	1	122.7	ICKHPESNFCSR(1)
P00329	102	Alcohol dehydrogenase 1	1	123.02	VIPLFSPQCGECR(1)
P00687	318	Alpha-amylase 1	1	206.63	ALVFVDNHDNQR(1)
P00688	71	Pancreatic alpha-amylase	0.941895	82.126	GFGGVQVSPPNENVVVHNPSR(0.942)PWWER(0.058)
P00688	264	Pancreatic alpha-amylase	1	142.32	GSEYFGNGR(1)VTEFK
P00688	478	Pancreatic alpha-amylase	1	158.56	VDGNCTGLR(1)VNVGSDGK
P00688	399	Pancreatic alpha-amylase	1	193.39	EVTINADTTCGNDWVCEHR(1)
P00920	245	Carbonic anhydrase 2	0.982185	94.352	TLNFNEEGDAEEAMVDNWR(0.982)PAQPLKNR(0.018)K
P01117	41	GTPase KRas	1	162.87	SALTIQLIQNHFVDEYDPTIQDSYR(1)K
P01193	170	Pro-opiomelanocortin	1	129.08	ELEGER(1)PLGLEQVLESDAEK
P01831	57	Thy-1 membrane glycoprotein	1	98.654	DNSIQHEFSLTR(1)
P01831	35	Thy-1 membrane glycoprotein	1	222.57	VTSLTACLVNQNLR(1)
P02088	105	Hemoglobin subunit beta-1	1	136.02	LHVDPENFR(1)
P02088	41	Hemoglobin subunit beta-1	1	156.81	LLVVYPWTQR(1)
P02463	1495	Collagen alpha-1(IV) chain	1	72.772	AHGQDLGTAGSCLR(1)K
P03911	432	NADH-ubiquinone oxidoreductase chain 4	1	73.688	LTNHMINLQPSHTR(1)
P03995	373	Glial fibrillary acidic protein	0.999984	58.479	LLEGEENR(1)ITIPVQTFSNLQIR
P03995	209	Glial fibrillary acidic protein	0.999999	62.958	ELR(1)EQLAQQQVHVEMDVAKPDLTAALR
P03995	233	Glial fibrillary acidic protein	1	80.02	EQLAQQQVHVEMDVAKPDLTAALR(1)
P03995	149	Glial fibrillary acidic protein	1	96.866	DNFAQDLGTLR(1)
P03995	138	Glial fibrillary acidic protein	1	98.175	LEVER(1)DNFAQDLGTLR
P03995	180	Glial fibrillary acidic protein	0.841549	98.75	LEAENNLAAYR(0.158)QEADEATLAR(0.842)
P03995	159	Glial fibrillary acidic protein	0.998859	99.969	LQDETNLR(0.999)LEAENNLAAYR(0.001)QEADEATLAR
P03995	26	Glial fibrillary acidic protein	1	121.82	GLGPSR(1)QLGTMPR
P03995	198	Glial fibrillary acidic protein	1	121.82	VESLEEEIQFLR(1)K
P03995	413	Glial fibrillary acidic protein	1	153.48	TVEMR(1)DGEVIKDSK
P03995	387	Glial fibrillary acidic protein	1	163.31	LLEGEENRITIPVQTFSNLQIR(1)
P03995	170	Glial fibrillary acidic protein	0.999839	171.08	LEAENNLAAYR(1)QEADEATLAR
P03995	102	Glial fibrillary acidic protein	1	188.91	ALAAELNQLR(1)
P03995	20	Glial fibrillary acidic protein	1	236.96	SYASETVVR(1)GLGPSR
P04247	119	Myoglobin	1	105.52	R(1)HSGDFGADAQGAMSK
P04247	140	Myoglobin	1	152.34	ALELFR(1)NDIAAK
P04370	181	Myelin basic protein	1	164.65	FFSGDR(1)GAPK
P04370	249	Myelin basic protein	0.998451	165.18	SGSPMAR(0.998)R(0.002)
P04370	242	Myelin basic protein	1	218.58	DSR(1)SGSPMAR(0.826)R(0.174)
P04370	228	Myelin basic protein	1	256.67	NIVTPR(1)TPPPSQGK
P04370	165	Myelin basic protein	1	268.47	HR(1)DTGILDSIGR
P04370	163	Myelin basic protein	1	278.16	HGFLPR(1)HR
P04370	210	Myelin basic protein	1	289.86	TTHYGSLPQKSQHGR(1)
P04370	175	Myelin basic protein	1	294.21	HRDTGILDSIGR(1)FFSGDRGAPK
P04370	195	Myelin basic protein	1	296.81	DSHTR(1)TTHYGSLPQKSQHGR
P04370	157	Myelin basic protein	1	352.87	YLATASTMDHAR(1)HGFLPR(0.844)HR(0.156)
P04919	194	Band 3 anion transport protein	0.999999	63.998	RSHAEDLGNLEGVKPAVLTR(1)
P05063	134	Fructose-bisphosphate aldolase C	1	82.946	VDKGVVPLAGTDGETTTQGLDGLLER(1)
P05063	173	Fructose-bisphosphate aldolase C	1	97.542	ISDRTPSALAILENANVLAR(1)
P05063	331	Fructose-bisphosphate aldolase C	1	100.93	R(1)AEMNGLAAQGR
P05063	43	Fructose-bisphosphate aldolase C	1	134.29	R(1)LSQIGVENTEENRR
P05063	342	Fructose-bisphosphate aldolase C	1	139.66	RAEMNGLAAQGR(1)
P05063	56	Fructose-bisphosphate aldolase C	0.999998	144.72	RLSQIGVENTEENR(1)
P05063	201	Fructose-bisphosphate aldolase C	1	226.4	R(1)CQYVTEK
P05064	134	Fructose-bisphosphate aldolase A	1	107.31	VDKGVVPLAGTNGETTTQGLDGLSER(1)
P05064	173	Fructose-bisphosphate aldolase A	1	154.84	IGEHTPSALAIMENANVLAR(1)
P05064	331	Fructose-bisphosphate aldolase A	1	164.15	R(1)ALANSLACQGK
P05064	43	Fructose-bisphosphate aldolase A	1	181.64	R(1)LQSIGTENTEENRR
P05064	56	Fructose-bisphosphate aldolase A	1	217.05	RLQSIGTENTEENR(1)
P05202	81	Aspartate aminotransferase, mitochondrial	0.995345	87.28	MNLGVGAYR(0.005)DDNGKPYVLPSVR(0.995)
P05202	325	Aspartate aminotransferase, mitochondrial	1	104.88	ILIRPLYSNPPLNGAR(1)
P05202	68	Aspartate aminotransferase, mitochondrial	1	114.24	MNLGVGAYR(1)DDNGKPYVLPSVR
P05202	180	Aspartate aminotransferase, mitochondrial	1	134.98	DAGMQLQGYR(1)
P05202	147	Aspartate aminotransferase, mitochondrial	1	185.96	VGASFLQR(1)
P05208	225	Chymotrypsin-like elastase family member 2A	1	41.672	SSMVCAGGDGVTSSCNGDSGGPLNCR(1)
P05213	422	Tubulin alpha-1B chain	0.999021	42.923	R(0.001)AFVHWYVGEGMEEGEFSEAR(0.999)EDMAALEK
P05213	215	Tubulin alpha-1B chain	0.997047	90.707	R(0.997)NLDIER(0.003)PTYTNLNR
P05213	339	Tubulin alpha-1B chain	1	132.79	R(1)SIQFVDWCPTGFK
P05213	221	Tubulin alpha-1B chain	1	147.09	NLDIER(1)PTYTNLNR
P05213	64	Tubulin alpha-1B chain	1	147.26	HVPR(1)AVFVDLEPTVIDEVR
P05213	105	Tubulin alpha-1B chain	1	210.08	EDAANNYAR(1)
P05213	229	Tubulin alpha-1B chain	1	261.02	NLDIERPTYTNLNR(1)
P05214	339	Tubulin alpha-3 chain	1	118.72	R(1)TIQFVDWCPTGFK
P06151	157	L-lactate dehydrogenase A chain	1	100.13	NR(1)VIGSGCNLDSAR
P06745	472	Glucose-6-phosphate isomerase	1	87.676	VFEGNR(1)PTNSIVFTK
P06745	417	Glucose-6-phosphate isomerase	1	140.73	MIPCDFLIPVQTQHPIR(1)K
P06745	96	Glucose-6-phosphate isomerase	1	194.06	INYTENR(1)
P06797	318	Cathepsin L1	1	143.4	DR(1)DNHCGLATAASYPVVN
P07146	95	Anionic trypsin-2	1	131.33	IIR(1)HPNYNSWTLDNDIMLIK
P07146	122	Anionic trypsin-2	1	162.31	LASPVTLNAR(1)
P07310	341	Creatine kinase M-type	0.999995	53.998	RGTGGVDTAAVGAVFDISNADR(1)
P07310	292	Creatine kinase M-type	1	56.681	AGHPFMWNEHLGYVLTCPSNLGTGLR(1)
P07310	96	Creatine kinase M-type	1	140.82	DLFDPIIQDR(1)HGGYKPTDK
P07724	34	Serum albumin	1	83.395	SEIAHR(1)YNDLGEQHFK
P07724	141	Serum albumin	1	96.287	DDNPSLPPFER(1)PEAEAMCTSFK
P07901	621	Heat shock protein HSP 90-alpha	1	91.64	AQALR(1)DNSTMGYMAAK
P07901	401	Heat shock protein HSP 90-alpha	1	131.67	GVVDSEDLPLNISR(1)
P07901	457	Heat shock protein HSP 90-alpha	1	182.37	LGIHEDSQNR(1)K
P08074	120	Carbonyl reductase [NADPH] 2	1	137.8	SVFQVSQMVAR(1)
P08074	173	Carbonyl reductase [NADPH] 2	1	145.77	IR(1)VNSVNPTVVLTDMGK
P08113	67	Endoplasmin	1	74.876	TDDEVVQREEEAIQLDGLNASQIR(1)
P08113	51	Endoplasmin	1	91.238	TDDEVVQR(1)EEEAIQLDGLNASQIR
P08113	530	Endoplasmin	1	116.45	FQSSHHSTDITSLDQYVER(1)
P08122	1535	Collagen alpha-2(IV) chain	1	100.45	AHNQDLGLAGSCLAR(1)
P08226	214	Apolipoprotein E	0.876604	108.71	TANLGAGAAQPLR(0.877)DR(0.123)
P08249	191	Malate dehydrogenase, mitochondrial	1	91.276	GLDPAR(1)VNVPVIGGHAGK
P08551	438	Neurofilament light polypeptide	1	77.899	SAYSGLQSSSYLMSAR(1)
P08551	23	Neurofilament light polypeptide	0.999719	107.5	YVETPR(1)VHISSVR
P08551	324	Neurofilament light polypeptide	1	169.65	TLEIEACR(1)
P08551	30	Neurofilament light polypeptide	1	195.77	VHISSVR(1)SGYSTAR
P08553	182	Neurofilament medium polypeptide	1	66.606	AQVQLDSDHLEEDIHR(1)
P08553	26	Neurofilament medium polypeptide	1	104.84	SSFSR(1)VSGSPSSGFR
P08553	722	Neurofilament medium polypeptide	1	110.03	AEEEGGSEEEGSDR(1)SPQESK
P08553	256	Neurofilament medium polypeptide	1	163.14	SNHEEEVADLLAQIQASHITVER(1)K
P08553	135	Neurofilament medium polypeptide	1	168.02	EIEAEIQALR(1)
P08553	380	Neurofilament medium polypeptide	1	176.04	HLR(1)EYQDLLNVK
P08553	309	Neurofilament medium polypeptide	1	179.79	LTEAAEQNKEAIR(1)
P08553	425	Neurofilament medium polypeptide	1	223.53	FSTFSGSITGPLYTHR(1)QPSVTISSK
P08553	369	Neurofilament medium polypeptide	1	235.57	HNHDLSSYQDTIQQLENELR(1)GTK
P08752	67	Guanine nucleotide-binding protein G(i) subunit alpha-2	1	130.72	IIHEDGYSEEECR(1)
P09036	42	Serine protease inhibitor Kazal-type 3	1	68.168	EASCHDAVAGCPR(1)
P09103	302	Protein disulfide-isomerase	1	93.776	ILFIFIDSDHTDNQR(1)
P09103	215	Protein disulfide-isomerase	1	172.81	KFDEGR(1)NNFEGEITKEK
P09103	99	Protein disulfide-isomerase	1	216.53	VDATEESDLAQQYGVR(1)
P09411	171	Phosphoglycerate kinase 1	1	72.21	LGDVYVNDAFGTAHR(1)
P09411	39	Phosphoglycerate kinase 1	1	224.66	NNQITNNQR(1)
P09542	90	Myosin light chain 3	1	151.99	ITYGQCGDVLR(1)
P09542	103	Myosin light chain 3	1	154.69	ALGQNPTQAEVLR(1)
P0CW02	72	Lymphocyte antigen 6C1	0.999987	55.453	TR(1)QCLSFCPAGVPIRDPNIR
P0DP28	87	Calmodulin-3	0.970506	63.291	DTDSEEEIR(0.971)EAFR(0.029)VFDKDGNGYISAAELR
P0DP28	91	Calmodulin-3	1	93.633	EAFR(1)VFDKDGNGYISAAELR
P0DP28	107	Calmodulin-3	1	116.73	VFDKDGNGYISAAELR(1)
P10107	97	Annexin A1	1	104.84	AAYLQENGKPLDEVLR(1)K
P10126	423	Elongation factor 1-alpha 1	1	51.473	SGDAAIVDMVPGKPMCVESFSDYPPLGR(1)
P10126	430	Elongation factor 1-alpha 1	1	164.53	DMR(1)QTVAVGVIK
P10605	314	Cathepsin B	1	76.21	ILR(1)GENHCGIESEIVAGIPR
P10605	128	Cathepsin B	1	145.46	TCIHTNGR(1)
P10637	534	Microtubule-associated protein tau	1	141.6	SR(1)LQTAPVPMPDLK
P10649	43	Glutathione S-transferase Mu 1	0.999808	82.177	RYTMGDAPDFDR(1)SQWLNEK
P11087	1055	Collagen alpha-1(I) chain	1	149.04	NGDR(1)GETGPAGPAGPIGPAGAR
P11499	612	Heat shock protein HSP 90-beta	1	96.391	AQALR(1)DNSTMGYMMAK
P11499	448	Heat shock protein HSP 90-beta	1	136.83	LGIHEDSTNR(1)
P11531	2669	Dystrophin	1	67.645	R(1)VSEQEAALEETHR
P11588	163	Major urinary protein 1	1	85.737	HGILR(1)ENIIDLSNANR
P11588	78	Major urinary protein 1	1	156.23	FHTVR(1)DEECSELSMVADK
P11588	174	Major urinary protein 1	1	166.91	HGILRENIIDLSNANR(1)
P11589	174	Major urinary protein 2	1	152.11	LCEEHGILRENIIDLSNANR(1)
P11627	43	Neural cell adhesion molecule L1	1	53.3	GHHVLEPPVITEQSPR(1)
P11679	347	Keratin, type II cytoskeletal 8	1	79.426	ASLEAAIADAEQR(1)GEMAIK
P11679	334	Keratin, type II cytoskeletal 8	1	98.292	NINRLQAEIEALKGQR(1)
P11679	18	Keratin, type II cytoskeletal 8	0.999991	116.06	MSTSGPR(1)AFSSR
P11679	32	Keratin, type II cytoskeletal 8	1	146.6	SFTSGPGAR(1)ISSSSFSR
P11679	94	Keratin, type II cytoskeletal 8	1	150.91	LEVDPNIQAVR(1)TQEK
P11679	23	Keratin, type II cytoskeletal 8	1	168.42	AFSSR(1)SFTSGPGAR
P11679	407	Keratin, type II cytoskeletal 8	1	205.77	LLEGEESR(1)LESGMQNMSIHTK
P11679	40	Keratin, type II cytoskeletal 8	1	226.99	ISSSSFSR(1)VGSSSSSFR
P11725	306	Ornithine carbamoyltransferase, mitochondrial	1	102.08	VAASDWTFLHCLPR(1)
P11798	283	Calcium/calmodulin-dependent protein kinase type II subunit alpha	1	154.15	STVASCMHR(1)
P11881	341	Inositol 1,4,5-trisphosphate receptor type 1	1	60.101	HLATGHYLAAEVDPDFEEECLEFQPSVDPDQDASR(1)
P11881	2164	Inositol 1,4,5-trisphosphate receptor type 1	1	155.1	NVGHNIYILAHQLAR(1)
P11930	345	Nucleoside diphosphate-linked moiety X motif 19, mitochondrial	1	83.944	VVIHSPYVYEIYMTLPSENKHVYPR(1)
P12382	301	ATP-dependent 6-phosphofructokinase, liver type	1	135.99	VTVLGHVQR(1)
P12658	68	Calbindin	1	165.16	SFVDQYGQR(1)DDGK
P12660	109	Purkinje cell protein 2	0.852654	110.01	RPGTLSPQPLLTPQDPAALSFR(0.147)R(0.853)
P12710	60	Fatty acid-binding protein, liver	1	104.18	VVR(1)NEFTLGEECELETMTGEK
P12787	127	Cytochrome c oxidase subunit 5A, mitochondrial	1	61.099	AGPHKEIYPYVIQELR(1)PTLNELGISTPEELGLDKV
P12787	94	Cytochrome c oxidase subunit 5A, mitochondrial	1	153.81	R(1)LNDFASAVR
P12961	55	Neuroendocrine protein 7B2	0.975645	90.348	LLHGVMEQLGIAR(0.976)PR(0.024)
P12961	42	Neuroendocrine protein 7B2	1	123.92	TPDRVSETDIQR(1)
P12970	89	60S ribosomal protein L7a	1	105.96	RLKVPPAINQFTQALDR(1)
P13595	787	Neural cell adhesion molecule 1	1	105.53	TEEER(1)TPNHDGGK
P13634	247	Carbonic anhydrase 1	0.968033	154.26	GLLSSAEGEPAVPVLSNHR(0.968)PPQPLKGR(0.032)
P13634	255	Carbonic anhydrase 1	0.983011	207.99	GLLSSAEGEPAVPVLSNHR(0.017)PPQPLKGR(0.983)
P13745	13	Glutathione S-transferase A1	1	96.464	AGKPVLHYFNAR(1)
P13745	204	Glutathione S-transferase A1	1	127.17	KFLQPGSQR(1)
P13745	152	Glutathione S-transferase A1	1	178.23	SHGQDYLVGNR(1)
P14094	136	Sodium/potassium-transporting ATPase subunit beta-1	1	86.557	DDMIFEDCGNVPSEPKER(1)
P14115	65	60S ribosomal protein L27a	1	151.95	R(1)NQSFCPTVNLDK
P14148	264	60S ribosomal protein L7	0.99999	231.44	TTHFVEGGDAGNREDQINR(1)
P14148	258	60S ribosomal protein L7	0.99998	271.66	TTHFVEGGDAGNR(1)EDQINR
P14152	230	Malate dehydrogenase, cytoplasmic	1	208.51	GEFITTVQQR(1)
P14206	155	40S ribosomal protein SA	1	79.586	ADHQPLTEASYVNLPTIALCNTDSPLR(1)
P14206	117	40S ribosomal protein SA	0.994452	158.52	FTPGTFTNQIQAAFR(0.994)EPR(0.006)
P14231	274	Sodium/potassium-transporting ATPase subunit beta-2	1	82.349	INAANIATDDER(1)DK
P14576	485	Signal recognition particle 54 kDa protein	1	100.53	VLHHMGGMAGLQSMMR(1)QFQQGAAGNMK
P14602	131	Heat shock protein beta-1	1	89.468	HEER(1)QDEHGYISR
P14869	112	60S acidic ribosomal protein P0	0.999996	75.524	EDLTEIRDMLLANKVPAAAR(1)
P14873	1829	Microtubule-associated protein 1B	1	50.271	ETAAAHQASSSPPIDAATAEPYGFR(1)
P14873	996	Microtubule-associated protein 1B	0.998172	65.184	R(0.002)ESVVSGDDR(0.998)AEEDMDDVLEK
P14873	1845	Microtubule-associated protein 1B	1	90.718	SSMLFDTMQHHLALNR(1)
P15105	357	Glutamine synthetase	0.999975	50.966	RPSANCDPYAVTEAIVR(1)
P15105	299	Glutamine synthetase	1	104.53	R(1)LTGFHETSNINDFSAGVANR
P15105	340	Glutamine synthetase	0.782181	143.07	GYFEDR(0.782)R(0.218)PSANCDPYAVTEAIVR
P15105	341	Glutamine synthetase	1	143.07	R(1)PSANCDPYAVTEAIVR
P15105	319	Glutamine synthetase	1	177.12	RLTGFHETSNINDFSAGVANR(1)
P15331	304	Peripherin	0.98326	70.555	YADLSDAANR(0.983)NHEALR(0.017)
P15331	310	Peripherin	0.830226	75.533	YADLSDAANR(0.17)NHEALR(0.83)
P15532	105	Nucleoside diphosphate kinase A	1	70.452	VMLGETNPADSKPGTIR(1)
P15532	18	Nucleoside diphosphate kinase A	1	159.34	TFIAIKPDGVQR(1)
P16015	188	Carbonic anhydrase 3	1	94.281	EAPFTHFDPSCLFPACR(1)
P16015	245	Carbonic anhydrase 3	0.999901	206.93	LRSLFSSAENEPPVPLVGNWR(1)PPQPVK
P16110	238	Galectin-3	1	117.18	VAVNDAHLLQYNHR(1)
P16125	158	L-lactate dehydrogenase B chain	1	83.758	HR(1)VIGSGCNLDSAR
P16125	318	L-lactate dehydrogenase B chain	1	153.95	DDEVAQLR(1)K
P16330	275	2',3'-cyclic-nucleotide 3'-phosphodiesterase	1	132.74	AAGAEEYAQQEVVKR(1)
P16330	129	2',3'-cyclic-nucleotide 3'-phosphodiesterase	0.915638	153.94	VLVLDDTNHER(0.084)ER(0.916)
P16330	113	2',3'-cyclic-nucleotide 3'-phosphodiesterase	0.935643	157.23	RLDEDLAGYCR(0.064)R(0.936)
P16330	112	2',3'-cyclic-nucleotide 3'-phosphodiesterase	1	171.76	RLDEDLAGYCR(1)
P16330	127	2',3'-cyclic-nucleotide 3'-phosphodiesterase	1	176.23	VLVLDDTNHER(1)
P16460	100	Argininosuccinate synthase	0.984687	163.8	YLLGTSLAR(0.015)PCIAR(0.985)
P16460	95	Argininosuccinate synthase	0.977458	183.23	YLLGTSLAR(0.977)PCIAR(0.023)
P16546	439	Spectrin alpha chain, non-erythrocytic 1	1	58.858	SADESGQALLAASHYASDEVR(1)EK
P16546	883	Spectrin alpha chain, non-erythrocytic 1	1	65.428	R(1)QDLEDSLQAQQYFADANEAESWMR
P16546	566	Spectrin alpha chain, non-erythrocytic 1	1	68.972	R(1)AQLADSFHLQQFFR
P16546	839	Spectrin alpha chain, non-erythrocytic 1	1	72.433	HQALQAEIAGHEPR(1)
P16546	733	Spectrin alpha chain, non-erythrocytic 1	1	74.428	HALLEADVAAHQDR(1)
P16546	2064	Spectrin alpha chain, non-erythrocytic 1	1	83.54	R(1)WTQLLANSATR
P16546	1803	Spectrin alpha chain, non-erythrocytic 1	1	84.365	DLTGVQNLR(1)K
P16546	1237	Spectrin alpha chain, non-erythrocytic 1	1	112.16	SQLLGSAHEVQR(1)
P16546	742	Spectrin alpha chain, non-erythrocytic 1	0.999982	120.29	HALLEADVAAHQDRIDGITIQAR(1)
P16546	1343	Spectrin alpha chain, non-erythrocytic 1	1	136.38	LGDSHDLQR(1)
P16546	18	Spectrin alpha chain, non-erythrocytic 1	1	150.12	VLETAEDIQER(1)
P16546	627	Spectrin alpha chain, non-erythrocytic 1	1	150.27	HQAFEAELSANQSR(1)
P16546	950	Spectrin alpha chain, non-erythrocytic 1	1	177.04	HEALMSDLSAYGSSIQALR(1)
P16546	1844	Spectrin alpha chain, non-erythrocytic 1	1	195.48	KLSDDNTIGQEEIQQR(1)
P16546	1273	Spectrin alpha chain, non-erythrocytic 1	1	308.35	NQALNTDNYGHDLASVQALQR(1)
P16858	198	Glyceraldehyde-3-phosphate dehydrogenase	1	87.319	DGR(1)GAAQNIIPASTGAAK
P16858	232	Glyceraldehyde-3-phosphate dehydrogenase	0.999994	90.907	LTGMAFR(1)VPTPNVSVVDLTCR
P16858	78	Glyceraldehyde-3-phosphate dehydrogenase	1	221.21	LVINGKPITIFQER(1)DPTNIK
P16858	246	Glyceraldehyde-3-phosphate dehydrogenase	1	230.3	VPTPNVSVVDLTCR(1)LEKPAK
P17182	50	Alpha-enolase	1	58.087	AAVPSGASTGIYEALELR(1)DNDK
P17183	429	Gamma-enolase	1	130.47	FAGHNFR(1)NPSVL
P17183	50	Gamma-enolase	0.995188	153.39	AAVPSGASTGIYEALELR(0.995)DGDKQR(0.005)
P17183	56	Gamma-enolase	0.999654	203.19	AAVPSGASTGIYEALELRDGDKQR(1)
P17563	34	Selenium-binding protein 1	1	69.331	GPREEIVYLPCIYR(1)
P17563	382	Selenium-binding protein 1	1	71.354	R(1)IPGGPQMIQLSLDGK
P17563	62	Selenium-binding protein 1	1	115.12	SPQYSQVIHR(1)LPMPYLK
P17563	276	Selenium-binding protein 1	1	139.67	FLHDPSATQGFVGCALSSNIQR(1)
P17710	215	Hexokinase-1	1	93.424	KLPVGFTFSFPCR(1)
P17717	353	UDP-glucuronosyltransferase 2B17	1	100.01	TPATLGHNTR(1)
P17742	69	Peptidyl-prolyl cis-trans isomerase A	1	83.758	IIPGFMCQGGDFTR(1)
P17751	256	Triosephosphate isomerase	1	191.51	SNVNDGVAQSTR(1)
P17892	297	Pancreatic lipase-related protein 2	1	123.75	NFAACNHLR(1)
P17892	456	Pancreatic lipase-related protein 2	1	161.68	VINLFRPTMGASQITVQR(1)
P18760	146	Cofilin-1	1	135.09	HELQANCYEEVKDR(1)
P18872	177	Guanine nucleotide-binding protein G(o) subunit alpha	1	112.82	IGAGDYQPTEQDILR(1)
P18872	145	Guanine nucleotide-binding protein G(o) subunit alpha	1	147.1	SR(1)EYQLNDSAK
P18894	288	D-amino-acid oxidase	0.822995	87.24	IVGELTGFR(0.026)PVR(0.151)PQVR(0.823)
P18894	284	D-amino-acid oxidase	0.83785	120.9	IVGELTGFR(0.155)PVR(0.838)PQVR(0.007)
P19123	147	Troponin C, slow skeletal and cardiac muscles	1	202.46	DGDKNNDGR(1)IDYDEFLEFMK
P19157	71	Glutathione S-transferase P 1	1	133.95	FEDGDLTLYQSNAILR(1)
P19157	101	Glutathione S-transferase P 1	1	139.69	NQREAAQMDMVNDGVEDLR(1)GK
P19157	85	Glutathione S-transferase P 1	1	140.13	NQR(1)EAAQMDMVNDGVEDLRGK
P19157	202	Glutathione S-transferase P 1	1	244.72	AFLSSPEHVNR(1)PINGNGKQ
P19246	93	Neurofilament heavy polypeptide	0.999997	55.819	FRGAASSTDSLDTLSNGPEGCVVAAVAAR(1)
P19246	66	Neurofilament heavy polypeptide	1	73.676	FR(1)GAASSTDSLDTLSNGPEGCVVAAVAAR
P19246	370	Neurofilament heavy polypeptide	1	118.24	HQADIASYQDAIQQLDSELR(1)
P19246	105	Neurofilament heavy polypeptide	1	132.14	EQLQALNDR(1)
P19246	131	Neurofilament heavy polypeptide	0.995568	136.26	SLEGEAAALR(0.996)QQQAGR(0.004)
P19246	229	Neurofilament heavy polypeptide	0.909918	162.29	AQALQEECGYLR(0.91)R(0.09)
P19246	137	Neurofilament heavy polypeptide	0.986419	168.08	SLEGEAAALR(0.014)QQQAGR(0.986)
P19246	190	Neurofilament heavy polypeptide	1	195.78	QR(1)EEAEAAAR
P20029	307	78 kDa glucose-regulated protein	1	128.01	ALSSQHQAR(1)
P20029	50	78 kDa glucose-regulated protein	1	159.26	NGR(1)VEIIANDQGNR
P20029	61	78 kDa glucose-regulated protein	1	196.37	VEIIANDQGNR(1)
P20029	533	78 kDa glucose-regulated protein	1	240.8	ITITNDQNR(1)
P20029	182	78 kDa glucose-regulated protein	1	278.93	VTHAVVTVPAYFNDAQR(1)
P20152	23	Vimentin	0.924742	112.82	MFGGSGTSSR(0.925)PSSNR(0.075)
P20152	207	Vimentin	0.98193	113.13	EEAESTLQSFR(0.982)QDVDNASLAR(0.018)
P20152	159	Vimentin	1	116.19	R(1)QVDQLTNDK
P20152	304	Vimentin	0.998828	133.21	FADLSEAANR(0.999)NNDALR(0.001)
P20152	28	Vimentin	0.999983	185.72	MFGGSGTSSRPSSNR(1)SYVTTSTR
P20152	450	Vimentin	1	205.24	TVETR(1)DGQVINETSQHHDDLE
P20357	51	Microtubule-associated protein 2	0.999954	60.062	NANGFPYR(1)EEEEGAFGEHR
P20357	1786	Microtubule-associated protein 2	1	93.776	ARVDHGAEIITQSPSR(1)
P20357	1488	Microtubule-associated protein 2	1	124.5	SEVQAHSPSR(1)K
P20357	1460	Microtubule-associated protein 2	0.999988	183.74	KEPSTVSR(1)DEVR
P20917	77	Myelin-associated glycoprotein	1	84.653	SR(1)TQVVHESFQGR
P20917	88	Myelin-associated glycoprotein	1	159.18	TQVVHESFQGR(1)
P20917	582	Myelin-associated glycoprotein	0.999949	185.44	R(1)LLGLRGESPELDLSYSHSDLGK
P20917	587	Myelin-associated glycoprotein	1	224.91	LLGLR(1)GESPELDLSYSHSDLGK
P20917	563	Myelin-associated glycoprotein	1	268.48	NVTESSSFSGGDNPHVLYSPEFR(1)ISGAPDK
P21107	92	Tropomyosin alpha-3 chain	1	155.49	R(1)IQLVEEELDRAQER
P21107	102	Tropomyosin alpha-3 chain	0.999908	194.37	IQLVEEELDR(1)AQER
P21107	106	Tropomyosin alpha-3 chain	0.900692	208.13	IQLVEEELDR(0.099)AQER(0.901)
P21460	44	Cystatin-C	0.837063	77.08	MLGAPEEADANEEGVR(0.837)R(0.163)
P22907	116	Porphobilinogen deaminase	1	78.326	R(1)ENPCDAVVFHPK
P23116	1111	Eukaryotic translation initiation factor 3 subunit A	0.981535	65.207	GADDDR(0.018)GPWR(0.982)NMDDDRVPR
P23116	956	Eukaryotic translation initiation factor 3 subunit A	0.999518	121.1	LGGDDEERESSLRPDDDR(1)IPR
P23116	1221	Eukaryotic translation initiation factor 3 subunit A	0.999978	129.02	RGPAEESSSWR(1)DSSR
P23116	1091	Eukaryotic translation initiation factor 3 subunit A	0.999935	131.33	RGLDDDRGPWR(1)NAAEDR
P23116	1259	Eukaryotic translation initiation factor 3 subunit A	0.866568	164.13	DLRDDRDR(0.867)R(0.133)
P23116	979	Eukaryotic translation initiation factor 3 subunit A	0.79937	164.53	RGPDEDRFSR(0.799)R(0.2)
P23242	293	Gap junction alpha-1 protein	0.988181	100.43	LVTGDR(0.988)NNSSCR(0.012)
P23242	362	Gap junction alpha-1 protein	0.972784	212.9	VAAGHELQPLAIVDQR(0.973)PSSR(0.027)
P23927	107	Alpha-crystallin B chain	1	156.1	HEER(1)QDEHGFISR
P24270	380	Catalase	0.999997	58.693	HRLGPNYLQIPVNCPYR(1)
P24270	23	Catalase	1	126.96	ASQR(1)PDVLTTGGGNPIGDK
P24270	458	Catalase	1	131.56	R(1)LCENIAGHLK
P24270	444	Catalase	1	155	RFNSANEDNVTQVR(1)
P24270	431	Catalase	1	162.77	R(1)FNSANEDNVTQVR
P24369	109	Peptidyl-prolyl cis-trans isomerase B	1	83.871	DFMIQGGDFTR(1)GDGTGGK
P24369	190	Peptidyl-prolyl cis-trans isomerase B	1	191.41	TDSR(1)DKPLKDVIIVDSGK
P24549	420	Retinal dehydrogenase 1	1	105	R(1)ANNTTYGLAAGLFTK
P24788	123	Cyclin-dependent kinase 11B	0.999995	64.104	RHRSHSAEGGKHAR(1)
P25688	147	Uricase	1	184.3	HVHAFIHTPTGTHFCEVEQMR(1)
P26039	1184	Talin-1	1	81.643	KASGHPGDPESQQR(1)
P26039	1919	Talin-1	1	96.848	HR(1)VQELGHGCSALVTK
P26039	2455	Talin-1	1	138.45	R(1)LQAAGNAVK
P26039	889	Talin-1	1	139.58	GAAAHPDSEEQQQR(1)
P26040	559	Ezrin	1	130.56	RTHNDIIHNENMR(1)
P26041	533	Moesin	1	82.877	ALTSELANAR(1)DESK
P26041	370	Moesin	1	148.52	KAQQELEEQTR(1)
P26041	570	Moesin	1	174.23	QR(1)IDEFESM
P26041	393	Moesin	1	188.48	ER(1)QEAEEAK
P26043	151	Radixin	1	103.13	EIHKPGYLANDR(1)
P26350	31	Prothymosin alpha	1	102.29	KEVVEEAENGR(1)
P26443	123	Glutamate dehydrogenase 1, mitochondrial	0.833223	77.08	IIKPCNHVLSLSFPIR(0.833)R(0.167)
P26443	476	Glutamate dehydrogenase 1, mitochondrial	1	108.08	DSNYHLLMSVQESLER(1)K
P26443	496	Glutamate dehydrogenase 1, mitochondrial	1	200.45	HGGTIPVVPTAEFQDR(1)
P26883	19	Peptidyl-prolyl cis-trans isomerase FKBP1A	1	179.66	R(1)GQTCVVHYTGMLEDGKK
P27048	49	Small nuclear ribonucleoprotein-associated protein B	1	84.653	HMNLILCDCDEFR(1)K
P27659	116	60S ribosomal protein L3	1	75.911	TVFAEHISDECKR(1)
P27661	89	Histone H2AX	1	209.7	HLQLAIR(1)NDEELNK
P27773	207	Protein disulfide-isomerase A3	1	54.764	EYDDNGEGITIFR(1)PLHLANK
P27773	329	Protein disulfide-isomerase A3	1	71.853	TFSHELSDFGLESTTGEVPVVAIR(1)
P28651	276	Carbonic anhydrase-related protein	0.945506	88.395	GAELVEGCDGILGDNFR(0.946)PTQPLSDR(0.054)
P28652	275	Calcium/calmodulin-dependent protein kinase type II subunit beta	1	90.729	RITAHEALKHPWVCQR(1)
P28652	507	Calcium/calmodulin-dependent protein kinase type II subunit beta	0.992179	235.22	LTQYIDGQGR(0.992)PR(0.008)
P28663	271	Beta-soluble NSF attachment protein	1	62.858	LLEAHEEQNSEAYTEAVKEFDSISR(1)
P28740	183	Kinesin-like protein KIF2A	0.999904	43.946	R(1)AQDVDATNPNYEIMCMIR
P28740	201	Kinesin-like protein KIF2A	1	71.376	RAQDVDATNPNYEIMCMIR(1)
P30115	45	Glutathione S-transferase A3	1	65.855	LR(1)SDGSLMFQQVPMVEIDGMK
P30275	375	Creatine kinase U-type, mitochondrial	1	182.64	RGTGGVDTAATGSVFDISNLDR(1)
P30999	233	Catenin delta-1	0.945049	158.61	HYEDGYPGGSDNYGSLSR(0.945)VTR(0.055)
P31001	179	Desmin	0.997526	83.423	ARVDVER(0.998)DNLIDDLQR(0.002)
P31001	200	Desmin	0.999989	86.8	LQEEIQLR(1)EEAENNLAAFR
P31001	188	Desmin	1	159.01	VDVERDNLIDDLQR(1)
P31230	185	Aminoacyl tRNA synthase complex-interacting multifunctional protein 1	1	50.202	KHPDADSLYVEEVDVGEAAPR(1)
P31725	25	Protein S100-A9	1	157.98	SITTIIDTFHQYSR(1)K
P31938	47	Dual specificity mitogen-activated protein kinase kinase 1	1	144.29	LEELELDEQQR(1)K
P32020	33	Non-specific lipid-transfer protein	1	78.708	FMKPGGENSR(1)DYPDMAK
P33267	262	Cytochrome P450 2F2	1	83.856	EHQDSLDPNSPR(1)
P33267	250	Cytochrome P450 2F2	1	89.374	SVR(1)EHQDSLDPNSPR
P33267	358	Cytochrome P450 2F2	1	96.379	TSMPYTDAVIHEVQR(1)
P34914	194	Bifunctional epoxide hydrolase 2	1	68.657	AKPNEVVFLDDFGSNLKPAR(1)
P34914	103	Bifunctional epoxide hydrolase 2	1	86.944	SINR(1)PMLQAAIALKK
P35486	119	Pyruvate dehydrogenase E1 component subunit alpha, somatic form, mitochondrial	1	49.967	GFCHLCDGQEACCVGLEAGINPTDHLITAYR(1)
P35505	95	Fumarylacetoacetase	1	77.506	ASLQNLLSASQAR(1)
P35550	106	rRNA 2'-O-methyltransferase fibrillarin	0.999998	99.092	NVMVEPHRHEGVFICR(1)
P35700	110	Peroxiredoxin-1	1	123.76	R(1)TIAQDYGVLK
P35802	269	Neuronal membrane glycoprotein M6-a	1	76.301	EEQELHDIHSTR(1)SK
P35979	146	60S ribosomal protein L12	1	57.484	EILGTAQSVGCNVDGR(1)HPHDIIDDINSGAVECPAS
P35979	114	60S ribosomal protein L12	1	96.153	HSGNITFDEIVNIAR(1)
P38647	107	Stress-70 protein, mitochondrial	1	138.97	R(1)QAVTNPNNTFYATK
P39053	297	Dynamin-1	0.966581	73.448	VLNQQLTNHIR(0.033)DTLPGLR(0.967)
P39053	290	Dynamin-1	1	114.46	VLNQQLTNHIR(1)
P39053	343	Dynamin-1	1	159.46	R(1)IEGSGDQIDTYELSGGAR
P39053	594	Dynamin-1	1	194.24	HIFALFNTEQR(1)
P40936	122	Indolethylamine N-methyltransferase	1	153.97	KEPGAYDWSSIVQHACELEGDR(1)
P41216	627	Long-chain-fatty-acid--CoA ligase 1	1	112.24	RGLQGSFEELCR(1)
P42669	139	Transcriptional activator protein Pur-alpha	0.757115	43.088	DYLGDFIEHYAQLGPSQPPDLAQAQDEPR(0.757)R(0.243)
P42669	198	Transcriptional activator protein Pur-alpha	0.999908	53.197	IRQTVNRGPGLGSTQGQTIALPAQGLIEFR(1)
P42669	170	Transcriptional activator protein Pur-alpha	0.772246	94.059	IR(0.772)QTVNR(0.228)GPGLGSTQGQTIALPAQGLIEFR
P43006	528	Excitatory amino acid transporter 2	1	170.74	TQSIYDDKNHR(1)
P43006	508	Excitatory amino acid transporter 2	1	234.9	SELDTIDSQHR(1)
P45376	70	Aldose reductase	1	126.32	R(1)QDLFIVSK
P45952	294	Medium-chain specific acyl-CoA dehydrogenase, mitochondrial	1	98.175	TRPTVAAGAVGLAQR(1)
P46096	260	Synaptotagmin-1	1	46.847	HDIIGEFKVPMNTVDFGHVTEEWR(1)DLQSAEK
P46460	337	Vesicle-fusing ATPase	1	91.1	QR(1)GSMAGSTGVHDTVVNQLLSK
P46460	533	Vesicle-fusing ATPase	1	109.42	NSDR(1)TPLVSVLLEGPPHSGK
P46460	415	Vesicle-fusing ATPase	1	110.74	MR(1)GHQLLSADVDIK
P46460	38	Vesicle-fusing ATPase	1	113.76	DFQSGQHVMVR(1)
P46460	67	Vesicle-fusing ATPase	1	124.19	THPSVVPGCIAFSLPQR(1)K
P46460	303	Vesicle-fusing ATPase	1	129.77	YVGESEANIR(1)K
P46460	314	Vesicle-fusing ATPase	1	134.13	LFADAEEEQR(1)
P46660	83	Alpha-internexin	1	85.855	RLPASDGLDLSQAAAR(1)
P46660	366	Alpha-internexin	1	117.51	HSAEVAGYQDSIGQLESDLR(1)
P46660	16	Alpha-internexin	1	136.68	SFGSEHYLCSASSYR(1)K
P46660	300	Alpha-internexin	1	146.67	FANLNEQAAR(1)
P46660	177	Alpha-internexin	1	164.48	DGLAEEVQR(1)
P46660	120	Alpha-internexin	1	186.58	VHQLETQNR(1)
P46735	159	Unconventional myosin-Ib	1	179.59	TVR(1)NDNSSR
P47757	215	F-actin-capping protein subunit beta	1	103.88	DETVSDCSPHIANIGR(1)
P47791	159	Glutathione reductase, mitochondrial	1	80.412	SHIEIIHGYATFADGPR(1)PTVEVNGK
P47857	129	ATP-dependent 6-phosphofructokinase, muscle type	0.999925	43.349	RGITNLCVIGGDGSLTGADTFR(1)
P47857	420	ATP-dependent 6-phosphofructokinase, muscle type	1	43.463	GGLHTVAVMNVGAPAAGMNAAVR(1)
P47857	108	ATP-dependent 6-phosphofructokinase, muscle type	0.999999	59.539	R(1)GITNLCVIGGDGSLTGADTFR
P47962	248	60S ribosomal protein L5	1	96.096	AHAAIR(1)ENPVYEK
P47963	60	60S ribosomal protein L13	0.99476	99.064	IAPRPASGPIR(0.005)PIVR(0.995)CPTVR
P47963	5	60S ribosomal protein L13	1	141.07	APSR(1)NGMILKPHFHK
P47963	116	60S ribosomal protein L13	1	239.61	STESLQANVQR(1)
P48678	296	Prelamin-A/C	1	56.882	NSNLVGAAHEELQQSR(1)
P48678	166	Prelamin-A/C	1	123.6	RTLEGELHDLR(1)GQVAK
P48758	134	Carbonyl reductase [NADPH] 1	1	113.24	ELLPLIKPQGR(1)
P48787	187	Troponin I, cardiac muscle	1	180.61	KEDIEKENR(1)
P48962	152	ADP/ATP translocase 1	1	146.6	GSSQR(1)EFNGLGDCLTK
P48962	259	ADP/ATP translocase 1	1	157.98	GADIMYTGTLDCWR(1)K
P49312	178	Heterogeneous nuclear ribonucleoprotein A1	1	79.652	YHTVNGHNCEVR(1)K
P49312	97	Heterogeneous nuclear ribonucleoprotein A1	1	103.67	EDSQR(1)PGAHLTVK
P49312	14	Heterogeneous nuclear ribonucleoprotein A1	1	111.64	SESPKEPEQLR(1)K
P49312	300	Heterogeneous nuclear ribonucleoprotein A1	1	113.88	SSGPYGGGGQYFAKPR(1)
P49312	122	Heterogeneous nuclear ribonucleoprotein A1	1	222.62	EDTEEHHLR(1)DYFEQYGK
P49817	19	Caveolin-1	1	145.65	YVDSEGHLYTVPIR(1)EQGNIYKPNNK
P50285	280	Dimethylaniline monooxygenase [N-oxide-forming] 1	1	88.561	TQLR(1)EPVLNDELPGR
P50396	35	Rab GDP dissociation inhibitor alpha	1	91.869	VLHMDR(1)NPYYGGESSSITPLEELYK
P50396	173	Rab GDP dissociation inhibitor alpha	0.910741	123.19	TFEGVDPQNTSMR(0.089)DVYR(0.911)K
P50396	169	Rab GDP dissociation inhibitor alpha	0.963775	130.89	TFEGVDPQNTSMR(0.964)DVYR(0.036)K
P50396	328	Rab GDP dissociation inhibitor alpha	1	208.72	NTNDANSCQIIIPQNQVNR(1)K
P50462	100	Cysteine and glycine-rich protein 3	1	71.709	GIGFGQGAGCLSTDTGEHLGLQFQQSPKPAR(1)
P50462	28	Cysteine and glycine-rich protein 3	1	123.76	TVYHAEEIQCNGR(1)
P50462	41	Cysteine and glycine-rich protein 3	1	134.13	TCFHCMACR(1)K
P50516	308	V-type proton ATPase catalytic subunit A	1	91.969	R(1)TALVANTSNMPVAAR
P50516	232	V-type proton ATPase catalytic subunit A	1	132.88	QVRPVTEKLPANHPLLTGQR(1)
P50516	215	V-type proton ATPase catalytic subunit A	1	173.36	QVR(1)PVTEKLPANHPLLTGQR
P50518	80	V-type proton ATPase subunit E 1	1	127.36	IQMSNLMNQAR(1)
P50518	222	V-type proton ATPase subunit E 1	1	138.45	GALFGANANR(1)K
P50544	616	Very long-chain specific acyl-CoA dehydrogenase, mitochondrial	1	67.827	IR(1)ENMASLQSSPQHQELFR
P50544	633	Very long-chain specific acyl-CoA dehydrogenase, mitochondrial	1	143.29	IRENMASLQSSPQHQELFR(1)
P50752	97	Troponin T, cardiac muscle	0.992117	52.359	LFMPNLVPPKIPDGER(0.992)VDFDDIHR(0.008)K
P50752	126	Troponin T, cardiac muscle	1	151.42	DLNELQTLIEAHFENR(1)K
P50752	243	Troponin T, cardiac muscle	1	220.82	ALAIDHLNEDQLR(1)EK
P51410	129	60S ribosomal protein L9	1	78.401	MR(1)TGVACSVSQAQK
P51660	199	Peroxisomal multifunctional enzyme type 2	1	83.758	NNIHCNTIAPNAGSR(1)
P51667	50	Myosin regulatory light chain 2, ventricular/cardiac muscle isoform	1	119.45	NDLR(1)DTFAALGR
P51667	129	Myosin regulatory light chain 2, ventricular/cardiac muscle isoform	1	137.01	EMLTTQAER(1)
P51667	40	Myosin regulatory light chain 2, ventricular/cardiac muscle isoform	1	195.71	EAFTIMDQNR(1)DGFIDK
P51859	189	Hepatoma-derived growth factor	1	50.783	ESGDHEEEDKEIAALEGER(1)PLPVEVEK
P51859	232	Hepatoma-derived growth factor	1	79.837	EEAEAQGVR(1)DHESL
P52196	249	Thiosulfate sulfurtransferase	1	84.653	VDLSQPLIATCR(1)K
P52480	32	Pyruvate kinase PKM	1	167.5	PKPHSEAGTAFIQTQQLHAAMADTFLEHMCR(1)
P52480	120	Pyruvate kinase PKM	0.800931	40.086	EATESFASDPILYR(0.199)PVAVALDTKGPEIR(0.801)
P52480	294	Pyruvate kinase PKM	1	80.361	RFDEILEASDGIMVAR(1)
P52480	339	Pyruvate kinase PKM	0.757688	133.15	KPR(0.758)PTR(0.242)AEGSDVANAVLDGADCIMLSGETAK
P52480	342	Pyruvate kinase PKM	0.757534	133.15	KPR(0.242)PTR(0.758)AEGSDVANAVLDGADCIMLSGETAK
P52480	399	Pyruvate kinase PKM	0.8331	53.3	EAEAAIYHLQLFEELR(0.833)R(0.167)
P52480	455	Pyruvate kinase PKM	0.992751	116.06	APIIAVTR(0.993)NPQTAR(0.007)
P52480	461	Pyruvate kinase PKM	0.999988	186.97	APIIAVTRNPQTAR(1)
P52503	75	NADH dehydrogenase [ubiquinone] iron-sulfur protein 6, mitochondrial	1	60.621	EVNENFAIDLIAQQPVNEVEHR(1)
P52760	29	Ribonuclease UK114	1	137.5	VISTTKAPAAIGPYSQAVQVDR(1)
P53996	161	Cellular nucleic acid-binding protein	0.999401	67.76	TSEVNCYR(0.999)CGESGHLAR(0.001)
P54071	89	Isocitrate dehydrogenase [NADP], mitochondrial	1	102.21	YFDLGLPNR(1)DQTNDQVTIDSALATQK
P54227	14	Stathmin	1	76.82	R(1)ASGQAFELILSPR
P54869	467	Hydroxymethylglutaryl-CoA synthase, mitochondrial	1	102.08	RRMSPEEFTEIMNQR(1)
P55012	221	Solute carrier family 12 member 2	1	224.99	IDHYR(1)HTAAQLGEK
P55088	284	Aquaporin-4	0.999823	44.533	GSYMEVEDNR(1)SQVETEDLILKPGVVHVIDIDRGEEK
P55264	148	Adenosine kinase	1	41.818	AADAHVDAHYYEQNEQPTGTCAACITGGNR(1)
P56391	20	Cytochrome c oxidase subunit 6B1	1	102.89	TAPFDSR(1)FPNQNQTK
P56395	52	Cytochrome b5	1	120.34	FLEEHPGGEEVLR(1)EQAGGDATENFEDVGHSTDAR
P56480	109	ATP synthase subunit beta, mitochondrial	1	123.14	LVLEVAQHLGESTVR(1)
P56480	345	ATP synthase subunit beta, mitochondrial	1	124.17	IPSAVGYQPTLATDMGTMQER(1)
P56480	422	ATP synthase subunit beta, mitochondrial	1	151.87	IMDPNIVGNEHYDVAR(1)
P56480	241	ATP synthase subunit beta, mitochondrial	1	235.69	TR(1)EGNDLYHEMIESGVINLK
P56564	505	Excitatory amino acid transporter 1	1	125.03	NR(1)DVEMGNSVIEENEMK
P56654	357	Cytochrome P450 2C37	1	77.037	SRMPYTDAMIHEVQR(1)
P57776	95	Elongation factor 1-delta	1	183.41	ITSLEVENQNLR(1)
P58252	767	Elongation factor 2	1	127.96	R(1)GHVFEESQVAGTPMFVVK
P58252	449	Elongation factor 2	1	172.57	KEDLYLKPIQR(1)
P58252	495	Elongation factor 2	1	197.14	TGTITTFEHAHNMR(1)
P58771	91	Tropomyosin alpha-1 chain	1	180.05	R(1)IQLVEEELDRAQER
P58771	90	Tropomyosin alpha-1 chain	1	211.68	KATDAEADVASLNR(1)
P58771	21	Tropomyosin alpha-1 chain	1	247.92	LDKENALDR(1)AEQAEADKK
P60202	127	Myelin proteolipid protein	1	78.95	GSR(1)GQHQAHSLER
P60202	124	Myelin proteolipid protein	1	188.19	GLSATVTGGQKGR(1)
P60202	205	Myelin proteolipid protein	1	246.34	TSASIGSLCADAR(1)
P60335	243	Poly(rC)-binding protein 1	1	92.372	LNQVAR(1)QQSHFAMMHGGTGFAGIDSSSPEVK
P60761	53	Neurogranin	1	86.946	SGECGR(1)KGPGPGGPGGAGGAR
P60761	68	Neurogranin	1	149.29	KGPGPGGPGGAGGAR(1)GGAGGGPSGD
P60761	38	Neurogranin	1	252.52	IQASFR(1)GHMAR
P60843	61	Eukaryotic initiation factor 4A-I	1	162.65	GIYAYGFEKPSAIQQR(1)
P60843	311	Eukaryotic initiation factor 4A-I	1	164.94	DFTVSAMHGDMDQKER(1)
P60879	142	Synaptosomal-associated protein 25	0.989802	51.301	R(0.01)VTNDAR(0.99)ENEMDENLEQVSGIIGNLR
P60879	8	Synaptosomal-associated protein 25	0.999351	60.621	AEDADMR(0.999)NELEEMQR(0.001)
P60879	17	Synaptosomal-associated protein 25	1	141.07	R(1)ADQLADESLESTRR
P60879	176	Synaptosomal-associated protein 25	1	171.98	HMALDMGNEIDTQNR(1)
P61082	157	NEDD8-conjugating enzyme Ubc12	0.892179	109.44	EAAEVLQNNR(0.892)R(0.108)
P61620	24	Protein transport protein Sec61 subunit alpha isoform 1	1	80.02	FLEVIKPFCVILPEIQKPER(1)K
P61922	285	4-aminobutyrate aminotransferase, mitochondrial	0.999995	53.481	R(1)TVAGIIVEPIQSEGGDNHASDDFFRK
P61922	310	4-aminobutyrate aminotransferase, mitochondrial	1	105.71	RTVAGIIVEPIQSEGGDNHASDDFFR(1)K
P61922	436	4-aminobutyrate aminotransferase, mitochondrial	1	107.5	GR(1)GTFCSFDTPDEAIR
P61979	69	Heterogeneous nuclear ribonucleoprotein K	0.999998	57.41	ALR(1)TDYNASVSVPDSSGPER
P61979	191	Heterogeneous nuclear ribonucleoprotein K	1	71.418	LFQECCPHSTDR(1)
P61979	325	Heterogeneous nuclear ribonucleoprotein K	0.988131	174.39	GGDLMAYDR(0.988)R(0.012)
P61982	42	14-3-3 protein gamma	1	169.43	NVTELNEPLSNEER(1)
P62137	187	Serine/threonine-protein phosphatase PP1-alpha catalytic subunit	0.849213	157.68	IFCCHGGLSPDLQSMEQIR(0.849)R(0.151)
P62141	313	Serine/threonine-protein phosphatase PP1-beta catalytic subunit	0.997136	63.302	YQYGGLNSGR(0.997)PVTPPR(0.003)
P62242	184	40S ribosomal protein S8	0.968709	78.95	LLACIASR(0.031)PGQCGR(0.969)
P62242	178	40S ribosomal protein S8	0.876397	92.264	LLACIASR(0.876)PGQCGR(0.124)
P62259	19	14-3-3 protein epsilon	1	88.872	LAEQAER(1)YDEMVESMKK
P62259	141	14-3-3 protein epsilon	1	173.03	YLAEFATGNDR(1)K
P62264	117	40S ribosomal protein S14	1	92.264	TKTPGPGAQSALR(1)
P62264	84	40S ribosomal protein S14	1	128.89	ADRDESSPYAAMLAAQDVAQR(1)
P62274	40	40S ribosomal protein S29	1	190.51	YGLNMCR(1)
P62281	118	40S ribosomal protein S11	1	88.561	NMSVHLSPCFR(1)
P62281	132	40S ribosomal protein S11	1	134.68	DVQIGDIVTVGECR(1)PLSK
P62737	179	Actin, aortic smooth muscle	1	55.158	TTGIVLDSGDGVTHNVPIYEGYALPHAIMR(1)
P62737	258	Actin, aortic smooth muscle	1	131.58	FR(1)CPETLFQPSFIGMESAGIHETTYNSIMK
P62761	150	Visinin-like protein 1	1	154.19	MNEDGLTPEQR(1)VDK
P62806	37	Histone H4	0.995761	93.106	DNIQGITKPAIR(0.004)R(0.996)
P62806	24	Histone H4	1	127.59	VLR(1)DNIQGITKPAIR
P62806	36	Histone H4	1	128.06	DNIQGITKPAIR(1)
P62814	82	V-type proton ATPase subunit B, brain isoform	1	164.53	R(1)SGQVLEVSGSK
P62814	208	V-type proton ATPase subunit B, brain isoform	1	195.3	IPIFSAAGLPHNEIAAQICR(1)
P62843	140	40S ribosomal protein S15	0.999965	74.364	HGRPGIGATHSSR(1)FIPLK
P62852	111	40S ribosomal protein S25	1	113.11	HRAQVIYTR(1)NTK
P62869	68	Transcription elongation factor B polypeptide 2	0.982208	46.412	TLGECGFTSQTAR(0.982)PQAPATVGLAFR(0.018)
P62874	314	Guanine nucleotide-binding protein G(I)/G(S)/G(T) subunit beta-1	1	146.67	AGVLAGHDNR(1)
P62874	8	Guanine nucleotide-binding protein G(I)/G(S)/G(T) subunit beta-1	1	159.75	SELDQLR(1)QEAEQLK
P62874	150	Guanine nucleotide-binding protein G(I)/G(S)/G(T) subunit beta-1	1	222.64	ELAGHTGYLSCCR(1)
P62880	8	Guanine nucleotide-binding protein G(I)/G(S)/G(T) subunit beta-2	0.99997	118.31	SELEQLR(1)QEAEQLR
P62880	150	Guanine nucleotide-binding protein G(I)/G(S)/G(T) subunit beta-2	1	134.14	ELPGHTGYLSCCR(1)
P62880	15	Guanine nucleotide-binding protein G(I)/G(S)/G(T) subunit beta-2	1	160.27	SELEQLRQEAEQLR(1)
P62881	86	Guanine nucleotide-binding protein subunit beta-5	1	93.424	LHDVELHQVAER(1)
P62889	56	60S ribosomal protein L30	1	162.93	LVILANNCPALR(1)K
P62900	92	60S ribosomal protein L31	1	148.41	R(1)NEDEDSPNK
P62918	123	60S ribosomal protein L8	1	117.15	AQLNIGNVLPVGTMPEGTIVCCLEEKPGDR(1)GK
P62960	144	Nuclease-sensitive element-binding protein 1	0.953625	166.62	YAADRNHYR(0.954)R(0.046)
P63001	163	Ras-related C3 botulinum toxin substrate 1	1	167.03	YLECSALTQR(1)
P63005	212	Platelet-activating factor acetylhydrolase IB subunit alpha	1	66.017	TMHGHDHNVSSVAIMPNGDHIVSASR(1)
P63011	151	Ras-related protein Rab-3A	1	123.32	GR(1)QLADHLGFEFFEASAK
P63017	77	Heat shock cognate 71 kDa protein	1	90.707	R(1)FDDAVVQSDMK
P63017	100	Heat shock cognate 71 kDa protein	1	113.88	HWPFMVVNDAGR(1)PK
P63017	533	Heat shock cognate 71 kDa protein	1	150.27	AEDEKQR(1)
P63017	171	Heat shock cognate 71 kDa protein	1	162.93	DAGTIAGLNVLR(1)
P63017	155	Heat shock cognate 71 kDa protein	1	173.18	TVTNAVVTVPAYFNDSQR(1)
P63017	36	Heat shock cognate 71 kDa protein	1	196.37	VEIIANDQGNR(1)
P63017	236	Heat shock cognate 71 kDa protein	1	219.87	STAGDTHLGGEDFDNR(1)
P63038	309	60 kDa heat shock protein, mitochondrial	1	92.792	VGLQVVAVKAPGFGDNR(1)K
P63044	30	Vesicle-associated membrane protein 2	0.76894	44.564	SATAATVPPAAPAGEGGPPAPPPNLTSNR(0.769)R(0.231)
P63044	66	Vesicle-associated membrane protein 2	1	110.6	LSELDDR(1)ADALQAGASQFETSAAK
P63044	31	Vesicle-associated membrane protein 2	1	130.27	R(1)LQQTQAQVDEVVDIMR
P63054	51	Purkinje cell protein 4	1	191.53	AAVAIQSQFR(1)K
P63085	299	Mitogen-activated protein kinase 1	1	80.184	R(1)IEVEQALAHPYLEQYYDPSDEPIAEAPFK
P63101	41	14-3-3 protein zeta/delta	1	278.27	SVTEQGAELSNEER(1)
P63158	110	High mobility group protein B1	1	87.352	RPPSAFFLFCSEYR(1)PK
P63216	17	Guanine nucleotide-binding protein G(I)/G(S)/G(O) subunit gamma-3	1	99.092	GETPVNSTMSIGQAR(1)K
P63260	177	Actin, cytoplasmic 2	1	40.208	TTGIVMDSGDGVTHTVPIYEGYALPHAILR(1)
P63260	256	Actin, cytoplasmic 2	1	102.72	FR(1)CPEALFQPSFLGMESCGIHETTFNSIMK
P63260	95	Actin, cytoplasmic 2	1	193.06	IWHHTFYNELR(1)VAPEEHPVLLTEAPLNPK
P63260	254	Actin, cytoplasmic 2	1	239.19	SYELPDGQVITIGNER(1)
P63318	104	Protein kinase C gamma type	1	52.927	FR(1)LHSYSSPTFCDHCGSLLYGLVHQGMK
P63318	21	Protein kinase C gamma type	0.783014	87.511	AGLGPGGGDSEGGPR(0.217)PLFCR(0.783)K
P63318	632	Protein kinase C gamma type	0.872135	112.17	LEIAPPFR(0.872)PR(0.106)PCGR(0.022)
P63318	638	Protein kinase C gamma type	0.797887	124.62	LEIAPPFR(0.101)PR(0.101)PCGR(0.798)
P63321	135	Ras-related protein Ral-A	1	128.61	R(1)QVSVEEAK
P63323	45	40S ribosomal protein S12	1	183.09	R(1)QAHLCVLASNCDEPMYVK
P63325	119	40S ribosomal protein S10	0.999477	106.38	FTR(0.999)GEADRDTYRR
P63325	124	40S ribosomal protein S10	0.99862	106.93	FTRGEADR(0.999)DTYR(0.001)R
P63325	116	40S ribosomal protein S10	0.962616	115.68	GPEGER(0.003)PAR(0.963)FTR(0.034)
P63325	153	40S ribosomal protein S10	1	133.93	KAEAGAGSATEFQFR(1)
P63328	254	Serine/threonine-protein phosphatase 2B catalytic subunit alpha isoform	1	104.94	TQEHFTHNTVR(1)
P68033	97	Actin, alpha cardiac muscle 1	1	193.06	IWHHTFYNELR(1)
P68254	138	14-3-3 protein theta	1	142.45	YLAEVACGDDR(1)K
P68372	241	Tubulin beta-4B chain	0.869921	76.052	LTTPTYGDLNHLVSATMSGVTTCLR(0.87)FPGQLNADLR(0.13)K
P68372	380	Tubulin beta-4B chain	1	128.01	R(1)ISEQFTAMFR
P68372	46	Tubulin beta-4B chain	1	129.59	FWEVISDEHGIDPTGTYHGDSDLQLER(1)
P68372	86	Tubulin beta-4B chain	1	132.84	SGPFGQIFR(1)PDNFVFGQSGAGNNWAK
P68372	2	Tubulin beta-4B chain	1	215.08	MR(1)EIVHLQAGQCGNQIGAK
P70349	119	Histidine triad nucleotide-binding protein 1	1	65.244	MVVNEGADGGQSVYHIHLHVLGGR(1)
P70404	381	Isocitrate dehydrogenase [NAD] subunit gamma 1, mitochondrial	1	72.474	AVLASMDNENMHTPDIGGQGTTSQAIQDIIR(1)
P84086	96	Complexin-2	1	151.04	AALEQPCEGSLTR(1)PK
P84089	13	Enhancer of rudimentary homolog	0.948708	87.676	SHTILLVQPTKR(0.949)PEGR(0.051)
P97300	149	Neuroplastin	1	133.48	AQATISVLQKPR(1)
P97315	99	Cysteine and glycine-rich protein 1	1	100.28	HEEAPGHR(1)PTTNPNASK
P97351	162	40S ribosomal protein S3a	1	153.74	TSYAQHQQVR(1)
P97384	334	Annexin A11	1	176.42	SDTSGHFQR(1)
P97427	552	Dihydropyrimidinase-related protein 1	0.837347	123.44	NLHQSNFSLSGAQIDDNNPR(0.837)R(0.163)
P97434	255	Myosin phosphatase Rho-interacting protein	0.939967	72.568	EDESTISGDR(0.94)VDGGR(0.06)K
P97447	44	Four and a half LIM domains protein 1	1	106.35	FCANTCVDCR(1)KPISADAK
P97449	218	Aminopeptidase N	1	58.98	VVATTQMQAADAR(1)K
P97450	54	ATP synthase-coupling factor 6, mitochondrial	1	117.79	R(1)QASGGPVDIGPEYQQDLDRELYK
P97450	73	ATP synthase-coupling factor 6, mitochondrial	1	144.43	RQASGGPVDIGPEYQQDLDR(1)ELYK
P97457	41	Myosin regulatory light chain 2, skeletal muscle isoform	0.999878	73.574	EAFTVIDQNR(1)DGIIDKEDLR
P97461	198	40S ribosomal protein S5	1	159.12	KDELER(1)VAK
P97467	462	Peptidyl-glycine alpha-amidating monooxygenase	0.810306	70.555	EGAEHEEGGNAILVR(0.19)DR(0.81)
P97872	277	Dimethylaniline monooxygenase [N-oxide-forming] 5	1	116.45	HR(1)ALSQHPTVNDDLPNR
P99024	46	Tubulin beta-5 chain	1	43.795	FWEVISDEHGIDPTGTYHGDSDLQLDR(1)
P99027	38	60S acidic ribosomal protein P2	1	218.88	KILDSVGIEADDDR(1)LNK
P99029	176	Peroxiredoxin-5, mitochondrial	1	80.632	R(1)FSMVIDNGIVK
Q00PI9	544	Heterogeneous nuclear ribonucleoprotein U-like protein 2	0.999999	65.184	RNFILDQCNVYNSGQR(1)
Q01853	487	Transitional endoplasmic reticulum ATPase	1	88.427	R(1)ELQELVQYPVEHPDK
Q01853	349	Transitional endoplasmic reticulum ATPase	0.984444	88.976	AHVIVMAATNR(0.984)PNSIDPALR(0.012)R(0.003)
Q01853	210	Transitional endoplasmic reticulum ATPase	1	115.79	REDEEESLNEVGYDDIGGCR(1)K
Q02053	693	Ubiquitin-like modifier-activating enzyme 1	1	87.323	LAGTQPLEVLEAVQR(1)
Q02248	151	Catenin beta-1	1	52.862	HAVVNLINYQDDAELATR(1)
Q02566	906	Myosin-6	1	70.555	NDLQLQVQAEQDNLNDAEER(1)
Q02566	1178	Myosin-6	1	91.238	R(1)DLEEATLQHEATAAALR
Q02566	725	Myosin-6	1	98.175	YR(1)ILNPAAIPEGQFIDSRK
Q02566	29	Myosin-6	0.999974	98.676	ERLEAQTR(1)PFDIR
Q02566	1608	Myosin-6	1	100.23	MVDSLQTSLDAETR(1)
Q02566	147	Myosin-6	0.999998	108.23	R(1)SEAPPHIFSISDNAYQYMLTDR
Q02566	23	Myosin-6	0.999794	115.56	ER(1)LEAQTRPFDIR
Q02566	1822	Myosin-6	1	119.39	VR(1)ELENELEAEQK
Q02566	190	Myosin-6	1	119.54	R(1)VIQYFASIAAIGDR
Q02566	1834	Myosin-6	1	130.98	VRELENELEAEQKR(1)
Q02566	741	Myosin-6	1	135.23	YRILNPAAIPEGQFIDSR(1)K
Q02566	1291	Myosin-6	1	140.14	LQTENGELAR(1)
Q02566	1195	Myosin-6	1	145.77	DLEEATLQHEATAAALR(1)K
Q02566	1339	Myosin-6	1	150.05	NALAHALQSSR(1)
Q02566	1374	Myosin-6	1	153.34	ANSEVAQWR(1)
Q02566	1679	Myosin-6	1	155.55	R(1)NNLLQAELEELR
Q02566	1678	Myosin-6	0.859635	155.55	DTQLQLDDAVHANDDLKENIAIVER(0.86)R(0.14)
Q02566	1911	Myosin-6	1	157.68	VQHELDEAEER(1)ADIAESQVNK
Q02566	1319	Myosin-6	1	162.67	R(1)QLEEEGKAK
Q02566	1384	Myosin-6	1	169.52	YETDAIQR(1)TEELEEAKK
Q02566	1262	Myosin-6	1	179.93	TLEDQANEYR(1)VK
Q02566	169	Myosin-6	1	180.97	RSEAPPHIFSISDNAYQYMLTDR(1)ENQSILITGESGAGK
Q02566	17	Myosin-6	1	184.78	TDAQMADFGAAAQYLR(1)K
Q02566	1636	Myosin-6	1	199.6	MEGDLNEMEIQLSQANR(1)
Q02566	1305	Myosin-6	1	202.16	EALISQLTR(1)
Q02566	654	Myosin-6	1	220.69	KGSSFQTVSALHR(1)ENLNK
Q02566	1346	Myosin-6	1	223.89	HDCDLLR(1)EQYEEEMEAK
Q02566	370	Myosin-6	1	225.88	QR(1)EEQAEPDGTEDADK
Q02566	696	Myosin-6	1	227.88	KAPGVMDNPLVMHQLR(1)
Q02566	1422	Myosin-6	1	240.25	HR(1)LQNEIEDLMVDVER
Q02566	1279	Myosin-6	1	265.22	SLNDFTTQR(1)
Q02566	1882	Myosin-6	1	280.85	R(1)QAEEAEEQANTNLSK
Q02566	1214	Myosin-6	1	327.25	KHADSVAELGEQIDNLQR(1)
Q03265	405	ATP synthase subunit alpha, mitochondrial	1	84.071	GIR(1)PAINVGLSVSR
Q03265	186	ATP synthase subunit alpha, mitochondrial	1	103.6	ISVR(1)EPMQTGIK
Q03265	424	ATP synthase subunit alpha, mitochondrial	1	162.26	VGSAAQTR(1)
Q03265	231	ATP synthase subunit alpha, mitochondrial	1	166.6	R(1)FNDGTDEK
Q03265	527	ATP synthase subunit alpha, mitochondrial	1	208.58	FENAFLSHVISQHQSLLGNIR(1)
Q03734	253	Serine protease inhibitor A3M	1	116.6	HFR(1)DEELSCSVLELK
Q04447	320	Creatine kinase B-type	0.999983	48.5	R(1)GTGGVDTAAVGGVFDVSNADR
Q04447	130	Creatine kinase B-type	1	77.575	TDLNPDNLQGGDDLDPNYVLSSR(1)
Q04447	341	Creatine kinase B-type	1	136.66	RGTGGVDTAAVGGVFDVSNADR(1)
Q04447	96	Creatine kinase B-type	1	149.99	DLFDPIIEER(1)HGGYQPSDEHK
Q04447	13	Creatine kinase B-type	1	187.21	LR(1)FPAEDEFPDLSSHNNHMAK
Q04447	366	Creatine kinase B-type	1	207.29	LLIEMEQR(1)
Q05421	75	Cytochrome P450 2E1	1	110.12	RFGPVFTLHLGQR(1)
Q05793	812	Basement membrane-specific heparan sulfate proteoglycan core protein	0.871884	66.467	ATATACR(0.872)PCPCPYIDASR(0.064)R(0.064)
Q05793	660	Basement membrane-specific heparan sulfate proteoglycan core protein	1	122.08	GHTPTHPGTLNQR(1)
Q05920	288	Pyruvate carboxylase, mitochondrial	1	137.61	VVEIAPATHLDPQLR(1)
Q07417	42	Short-chain specific acyl-CoA dehydrogenase, mitochondrial	1	88.555	LHTVYQSVELPETHQMLR(1)
Q08331	244	Calretinin	1	98.281	KEMNIQQLTTYR(1)K
Q11011	913	Puromycin-sensitive aminopeptidase	1	93.909	RDADSIHQYLLQR(1)
Q3TEI4	5	Uncharacterized protein C15orf39 homolog	1	47.082	AEKR(1)PLGPLGPMMYGK
Q3UHF7	1696	Transcription factor HIVEP2	1	66.536	ITAEIYTLAAMHR(1)PGAGK
Q3UHL1	23	CaM kinase-like vesicle-associated protein	1	88.872	NYNQPSEVTDR(1)YDLGQVIK
Q3UHX9	48	Uncharacterized protein C9orf114 homolog	1	166.16	QR(1)AQEEEAK
Q3ULD5	268	Methylcrotonoyl-CoA carboxylase beta chain, mitochondrial	1	61.709	AATGEEVSAEDLGGADLHCR(1)K
Q3UM45	77	Protein phosphatase 1 regulatory subunit 7	0.99913	42.709	GAEDPEEEHELAVDMETINLDR(0.999)DAEDVDLTHYR(0.001)
Q3UNH4	672	G protein-regulated inducer of neurite outgrowth 1	1	66.246	SIGSLPER(1)EPSASTSQK
Q3UNZ8	339	Quinone oxidoreductase-like protein 2	1	142.38	INDAFLHVMQR(1)
Q3UPL0	824	Protein transport protein Sec31A	1	71.263	GRPGPVAGHSQMPR(1)
Q3UPL0	1168	Protein transport protein Sec31A	1	118.96	LR(1)EQTLSPTIINGLHSIAR
Q3UYH7	158	Beta-adrenergic receptor kinase 2	1	57.525	QVTATLFQPYIEEICESLR(1)
Q4VAA2	27	Protein CDV3	0.999997	59.122	SSR(1)AANAASGAGGSSAAAGSRPGDGGSLGSGAR
Q5BKQ4	141	Inactive pancreatic lipase-related protein 1	1	153.75	RGSQTTYTQAANNVR(1)
Q5BKQ4	127	Inactive pancreatic lipase-related protein 1	1	202.81	R(1)GSQTTYTQAANNVR
Q5SVD0	4	Protein FAM101B	1	71.309	MVGR(1)LSLQDVPELVDTKK
Q5SX39	698	Myosin-4	1	88.565	TPGAMEHELVLHQLR(1)
Q5SX39	1800	Myosin-4	1	156.67	DLQHR(1)LDEAEQLALK
Q5SX39	1884	Myosin-4	1	160.57	R(1)QAEEAEEQSNVNLAK
Q5SX40	1669	Myosin-1	1	55.844	DTQLHLDDALR(1)GQEDLK
Q5SX40	1200	Myosin-1	1	79.143	DLEEATLQHEATAATLR(1)K
Q60597	637	2-oxoglutarate dehydrogenase, mitochondrial	1	63.225	VASSVPVENFTIHGGLSR(1)
Q60597	323	2-oxoglutarate dehydrogenase, mitochondrial	1	98.156	LNVLANVIR(1)K
Q60597	883	2-oxoglutarate dehydrogenase, mitochondrial	1	143.46	TSFDEMLPGTHFQR(1)
Q60597	1008	2-oxoglutarate dehydrogenase, mitochondrial	1	155.26	THLTELQR(1)
Q60598	97	Src substrate cortactin	1	146.81	MDR(1)SAVGHEYQSK
Q60675	80	Laminin subunit alpha-2	0.826354	72.21	LVEHVPGQPVR(0.174)NPQCR(0.826)
Q60675	75	Laminin subunit alpha-2	0.868802	99.044	LVEHVPGQPVR(0.869)NPQCR(0.131)
Q60692	78	Proteasome subunit beta type-6	1	86.497	LTPIHDHIFCCR(1)
Q60829	167	Protein phosphatase 1 regulatory subunit 1B	0.987526	46.187	GLEGPWER(0.002)PPPLDEPQR(0.988)DGNSEDQVEGR(0.01)
Q60829	56	Protein phosphatase 1 regulatory subunit 1B	1	174.63	VSEHSSPEEEASPHQR(1)
Q60829	40	Protein phosphatase 1 regulatory subunit 1B	0.999831	181.88	RRPTPAMLFR(1)VSEHSSPEEEASPHQR
Q60930	264	Voltage-dependent anion-selective channel protein 2	1	172.74	VNNSSLIGVGYTQTLR(1)PGVK
Q60931	252	Voltage-dependent anion-selective channel protein 3	1	187.21	VNNASLIGLGYTQTLR(1)PGVK
Q60932	133	Voltage-dependent anion-selective channel protein 1	1	121.94	R(1)EHINLGCDVDFDIAGPSIR
Q60932	176	Voltage-dependent anion-selective channel protein 1	1	181.72	SR(1)VTQSNFAVGYK
Q61024	550	Asparagine synthetase [glutamine-hydrolyzing]	1	109.37	WINATDPSAR(1)TLTHYK
Q61097	305	Kinase suppressor of Ras 1	1	113.42	SHESQLGNR(1)IDDVTPMK
Q61166	162	Microtubule-associated protein RP/EB family member 1	0.924408	68.42	KPLGSSTAAPQR(0.924)PIATQR(0.076)
Q61176	255	Arginase-1	0.999999	62.034	KRPIHLSFDVDGLDPAFTPATGTPVLGGLSYR(1)
Q61176	92	Arginase-1	1	139.22	NGR(1)VSVVLGGDHSLAVGSISGHAR
Q61176	71	Arginase-1	1	149.16	DHGDLAFVDVPNDSSFQIVKNPR(1)
Q61292	1695	Laminin subunit beta-2	1	78.978	RAGNSLAASTAEETAGSAQSR(1)
Q61553	82	Fascin	1	154.26	YLAADKDGNVTCER(1)
Q61644	341	Protein kinase C and casein kinase substrate in neurons protein 1	1	70.229	KAEGATLSNATGAVESTSQAGDR(1)
Q61644	266	Protein kinase C and casein kinase substrate in neurons protein 1	0.999994	71.592	RHLNLAENSSYMHVYR(1)
Q61644	196	Protein kinase C and casein kinase substrate in neurons protein 1	1	154.81	CR(1)QDVQK
Q61656	509	Probable ATP-dependent RNA helicase DDX5	0.995684	90.581	RGGFNTFR(0.996)DR(0.003)ENYDR(0.002)
Q61656	516	Probable ATP-dependent RNA helicase DDX5	0.999992	142.58	DRENYDR(1)GYSNLLK
Q61767	94	3 beta-hydroxysteroid dehydrogenase type 4	1	83.602	RACQGMSAVIHTAAAIDPLGAASR(1)
Q61792	130	LIM and SH3 domain protein 1	1	100.02	SR(1)MGPSGGEGVEPERR
Q61879	1710	Myosin-10	1	80.813	HAEQER(1)DELADEIANSASGK
Q61879	700	Myosin-10	1	138.19	LDPHLVLDQLR(1)
Q61885	53	Myelin-oligodendrocyte glycoprotein	1	191.78	ALVGDEAELPCR(1)
Q61937	45	Nucleophosmin	1	118.5	VDNDENEHQLSLR(1)
Q62009	230	Periostin	1	59.339	VIHGNQIATNGVVHVIDR(1)
Q62151	115	Advanced glycosylation end product-specific receptor	1	54.017	VR(1)VYQIPGKPEIVDPASELTASVPNK
Q62167	622	ATP-dependent RNA helicase DDX3X	0.999999	89.468	ASSSR(1)SGGGGHGGSR
Q62167	110	ATP-dependent RNA helicase DDX3X	0.998027	109.65	GRGDYDGIGGR(0.998)GDR(0.002)
Q62167	600	ATP-dependent RNA helicase DDX3X	0.999462	122.16	FSGGFGAR(0.999)DYR(0.001)
Q62167	99	ATP-dependent RNA helicase DDX3X	0.978496	135.76	GRFDDR(0.978)GR(0.021)GDYDGIGGR
Q62167	75	ATP-dependent RNA helicase DDX3X	0.998025	149.19	DAYSSFGSR(0.998)GDSR(0.002)
Q62167	113	ATP-dependent RNA helicase DDX3X	0.999719	156.88	GRGDYDGIGGRGDR(1)SGFGK
Q62186	59	Translocon-associated protein subunit delta	1	98.676	NR(1)VQNMALYADVSGK
Q62188	467	Dihydropyrimidinase-related protein 3	1	84.946	IMLEDGNLHVTQGAGR(1)
Q62261	2205	Spectrin beta chain, non-erythrocytic 1	1	77.871	TLETPAAQMEGFLNR(1)K
Q62261	1834	Spectrin beta chain, non-erythrocytic 1	1	90.464	KLPEELGR(1)DQNTVETLQR
Q62261	1844	Spectrin beta chain, non-erythrocytic 1	1	98.543	KLPEELGRDQNTVETLQR(1)
Q62261	797	Spectrin beta chain, non-erythrocytic 1	1	101.85	DVAEEITNYR(1)PTIDTLHEQASALPQAHAESPDVK
Q62261	1245	Spectrin beta chain, non-erythrocytic 1	1	109.72	LVSDGNINSDR(1)IQEK
Q62261	890	Spectrin beta chain, non-erythrocytic 1	1	166.6	LEDLEVIQHR(1)
Q62261	1861	Spectrin beta chain, non-erythrocytic 1	1	180.52	MHTTFEHDIQALGTQVR(1)
Q62420	296	Endophilin-A1	1	108.55	MSLEFATGDSTQPNGGLSHTGTPKPPGVQMDQPCCR(1)
Q62426	91	Cystatin-B	1	49.559	VFQPLPHENKPLTLSSYQTNKER(1)
Q62433	56	Protein NDRG1	1	98.443	GNR(1)PVILTYHDIGMNHK
Q62433	3	Protein NDRG1	1	158.67	SR(1)ELHDVDLAEVKPLVEK
Q62465	370	Synaptic vesicle membrane protein VAT-1 homolog	1	94.09	LVALYNQGHIKPR(1)
Q62468	138	Villin-1	1	153.09	HVETNSCDVQR(1)
Q63918	151	Serum deprivation-response protein	1	117.08	RLENNHAQLLR(1)
Q64285	474	Bile salt-activated lipase	0.935021	118.27	WMGADHADDLQYVFGKPFATPLGYR(0.935)PQDR(0.065)
Q64285	67	Bile salt-activated lipase	1	126.02	TLENPQR(1)HPGWQGTLK
Q64331	199	Unconventional myosin-VI	1	145.09	TVR(1)NNNSSR
Q64332	59	Synapsin-2	1	83.36	R(1)PPPAQAPAPQPAPQPAPTPSVGSSFFSSLSQAVK
Q64332	429	Synapsin-2	1	130.49	TPALSPQR(1)PLTTQQPQSGTLKEPDSSK
Q64374	274	Regucalcin	1	151.06	DGLNAEGLLR(1)QPDAGNIFK
Q64436	394	Potassium-transporting ATPase alpha chain 1	1	184.36	TGTLTQNR(1)
Q64436	236	Potassium-transporting ATPase alpha chain 1	1	271.58	VDNSSLTGESEPQTR(1)
Q64458	357	Cytochrome P450 2C29	1	143.57	SHMPYTDAMIHEVQR(1)
Q64521	380	Glycerol-3-phosphate dehydrogenase, mitochondrial	1	47.73	MTIAGTTDTPTDVTHHPIPSEEDINFILNEVR(1)
Q64727	341	Vinculin	1	78.326	AR(1)GQGASPVAMQK
Q64727	684	Vinculin	1	79.676	ILLR(1)NPGNQAAYEHFETMK
Q64727	428	Vinculin	0.99514	92.474	IAELCDDPKER(0.995)DDILR(0.005)
Q64727	538	Vinculin	1	102.07	LANVMMGPYR(1)QDLLAK
Q64727	547	Vinculin	1	121.25	CDR(1)VDQLTAQLADLAAR
Q68FD5	1204	Clathrin heavy chain 1	1	165.47	LAELEEFINGPNNAHIQQVGDR(1)
Q68FD5	437	Clathrin heavy chain 1	0.999998	170.61	YESLELCR(1)PVLQQGRK
Q68FD5	444	Clathrin heavy chain 1	0.999999	188.27	YESLELCRPVLQQGR(1)
Q68FD5	157	Clathrin heavy chain 1	1	203.27	HSSLAGCQIINYR(1)
Q68FL4	119	Putative adenosylhomocysteinase 3	1	72.568	HRDGGEALVSPDGTVTEAPR(1)
Q6A0A2	421	La-related protein 4B	0.999998	88.385	SHLR(1)HAIPSTER
Q6IRU5	113	Clathrin light chain B	1	147.56	R(1)LQELDAASK
Q6NZJ6	1019	Eukaryotic translation initiation factor 4 gamma 1	1	119.54	EAEMEEHR(1)EHIK
Q6P2K6	635	Serine/threonine-protein phosphatase 4 regulatory subunit 3A	1	169.41	LRFEQQR(1)
Q6P8J7	243	Creatine kinase S-type, mitochondrial	1	114.68	LIDDHFLFDKPVSPLLTCAGMAR(1)
Q6P8J7	220	Creatine kinase S-type, mitochondrial	1	293.41	LSEMTEQDQQR(1)
Q6P8U6	330	Pancreatic triacylglycerol lipase	1	56.688	CFPCGSGGCPQMGHYADR(1)YPGK
Q6P8U6	139	Pancreatic triacylglycerol lipase	1	145.49	TTYTQATQNVR(1)
Q6P9K8	934	Caskin-1	0.999368	77.068	NVNR(0.999)SQSFAVR(0.001)PR
Q6PGH2	15	Hematological and neurological expressed 1-like protein	1	72.191	SGSR(1)SMKPPGGESSDLFGSPEEGISSSKPNR
Q6PIC6	648	Sodium/potassium-transporting ATPase subunit alpha-3	1	143.94	LNIPVSQVNPR(1)
Q6PIC6	697	Sodium/potassium-transporting ATPase subunit alpha-3	1	198.81	LIIVEGCQR(1)
Q6PIC6	43	Sodium/potassium-transporting ATPase subunit alpha-3	1	205.52	MSVEEVCR(1)K
Q6PIC6	492	Sodium/potassium-transporting ATPase subunit alpha-3	1	210.29	YQLSIHETEDPNDNR(1)YLLVMK
Q6PIC6	420	Sodium/potassium-transporting ATPase subunit alpha-3	1	233.89	SSHTWVALSHIAGLCNR(1)
Q6PIE5	493	Sodium/potassium-transporting ATPase subunit alpha-2	1	88.244	YQLSIHER(1)EDSPQSHVLVMK
Q6PIE5	680	Sodium/potassium-transporting ATPase subunit alpha-2	0.99996	115.01	DMTSEQLDEILR(1)DHTEIVFAR
Q6R891	370	Neurabin-2	1	86.946	GVDNGR(1)APDMAPEEVDESK
Q6URW6	593	Myosin-14	1	91.276	NLR(1)DQADFSVLHYAGK
Q6URW6	968	Myosin-14	1	96.793	R(1)LQQHIQELESHLEAEEGAR
Q6WVG3	207	BTB/POZ domain-containing protein KCTD12	0.800408	64.502	SPSGGAAGPLLTPSQSLDGSR(0.8)R(0.2)
Q6ZQ58	638	La-related protein 1	0.999992	113.54	RHPGGDR(1)TGNHTSR
Q6ZWV3	128	60S ribosomal protein L10	1	100.4	GAFGKPQGTVAR(1)
Q6ZWV7	32	60S ribosomal protein L35	1	166.07	VELSQLR(1)
Q6ZWY3	23	40S ribosomal protein S27-like	1	58.079	R(1)LVQSPNSYFMDVK
Q6ZWY3	5	40S ribosomal protein S27-like	1	178.03	PLAR(1)DLLHPSLEEEKK
Q6ZWY9	80	Histone H2B type 1-C/E/G	1	196.78	IAGEASR(1)LAHYNK
Q765H6	20	Alpha-1,6-mannosylglycoprotein 6-beta-N-acetylglucosaminyltransferase B	0.997248	40.533	MITVNPDGKIMVR(0.001)R(0.001)CLVTLR(0.997)
Q78PY7	184	Staphylococcal nuclease domain-containing protein 1	0.999704	41.475	YTIENPR(1)HFVDSHHQKPVNAIIEHVR
Q78PY7	423	Staphylococcal nuclease domain-containing protein 1	1	117.62	KVNVTVDYIR(1)PASPATETVPAFSER
Q78PY7	503	Staphylococcal nuclease domain-containing protein 1	1	150.06	KEVPIHR(1)VADISGDTQK
Q78PY7	485	Staphylococcal nuclease domain-containing protein 1	1	168.64	SSHYDELLAAEAR(1)AIK
Q78PY7	472	Staphylococcal nuclease domain-containing protein 1	1	169.33	YRQDDDQR(1)
Q7TMF3	9	NADH dehydrogenase [ubiquinone] 1 alpha subcomplex subunit 12	1	87.99	R(1)GVQQVTGHGGLR
Q7TNG8	431	Probable D-lactate dehydrogenase, mitochondrial	1	83.992	R(1)ALALGGTCTGEHGIGLGK
Q7TNG8	450	Probable D-lactate dehydrogenase, mitochondrial	1	127.92	R(1)QLLQEEVGPVGVETMR
Q7TPR4	614	Alpha-actinin-1	1	115.04	R(1)DQALTEEHAR
Q7TPZ8	169	Carboxypeptidase A1	1	82.859	FSTGGTNR(1)PAIWIDTGIHSR
Q7TPZ8	155	Carboxypeptidase A1	1	121.26	IQIGSTFEGR(1)PINVLK
Q7TQ48	496	Sarcalumenin	1	188.29	TLMLNEDKPADDYSAVLQR(1)
Q7TQD2	29	Tubulin polymerization-promoting protein	0.999947	46.862	R(1)LSLESEGANEGATAAPELSALEEAFRR
Q7TQD2	56	Tubulin polymerization-promoting protein	0.817905	55.158	RLSLESEGANEGATAAPELSALEEAFR(0.182)R(0.818)
Q7TQD2	55	Tubulin polymerization-promoting protein	0.820462	88.573	RLSLESEGANEGATAAPELSALEEAFR(0.82)R(0.18)
Q7TQD2	164	Tubulin polymerization-promoting protein	1	157.57	AVSSPTVSR(1)LTDTSK
Q7TSJ2	431	Microtubule-associated protein 6	0.975572	58.812	QIREEVASTVSSSYR(0.976)NEFR(0.024)
Q7TSJ2	282	Microtubule-associated protein 6	0.932988	119.39	ASGADQR(0.067)DTR(0.933)
Q7TSJ2	279	Microtubule-associated protein 6	0.999973	148.48	ASGADQR(1)DTR
Q7TSJ2	435	Microtubule-associated protein 6	1	154.34	NEFR(1)AWTDIKPVKPIK
Q80TL4	327	Protein KIAA1045	1	72.687	R(1)LTEAPSCSVSISHVGPIADSSPAASSSK
Q80TZ3	277	Putative tyrosine-protein phosphatase auxilin	1	83.666	NGCR(1)PYCDVLIGETK
Q80VC9	794	Calmodulin-regulated spectrin-associated protein 3	1	81.974	LAPLTR(1)VLTPPHDVDSLPHLRK
Q80VR2	13	RNA polymerase II elongation factor ELL3	1	83.823	EGTQEALSGKMR(1)
Q80YN3	613	Breast carcinoma-amplified sequence 1 homolog	1	132.36	R(1)MSDAQVQTDPVSIGPVGK
Q80YX1	2029	Tenascin	1	66.467	VEGYSGTAGDSMNYHNGR(1)
Q810U3	449	Neurofascin	1	67.646	TR(1)LDCPFFGSPIPTLR
Q810U3	121	Neurofascin	1	94.632	SGGRPEEYEGEYQCFAR(1)
Q8BFR5	53	Elongation factor Tu, mitochondrial	1	56.172	TYVR(1)DKPHVNVGTIGHVDHGK
Q8BG05	16	Heterogeneous nuclear ribonucleoprotein A3	0.825069	90.729	MEVKPPPGR(0.014)PQPDSGR(0.825)R(0.161)
Q8BG05	9	Heterogeneous nuclear ribonucleoprotein A3	0.999979	116.39	MEVKPPPGR(1)PQPDSGRR
Q8BG39	7	Synaptic vesicle glycoprotein 2B	1	82.635	YR(1)DNYEGYAPSDGYYR
Q8BG75	300	Transmembrane protein 198	0.970642	85.493	APPR(0.001)PGPPDPAYR(0.029)R(0.971)
Q8BGD9	356	Eukaryotic translation initiation factor 4B	0.999995	85.998	EDDASASTSQSSR(1)AASIFGGAKPVDTAAR
Q8BGD9	225	Eukaryotic translation initiation factor 4B	0.961436	120.9	RGDDSFGDKYR(0.961)DR(0.039)
Q8BGD9	292	Eukaryotic translation initiation factor 4B	0.99996	134.29	RDDDYR(1)GGGDRYEDR
Q8BGD9	273	Eukaryotic translation initiation factor 4B	0.999966	140.35	DYDRGYDSR(1)IGSGR
Q8BGD9	318	Eukaryotic translation initiation factor 4B	0.999999	145.29	DDYSR(1)DDYRR
Q8BH59	565	Calcium-binding mitochondrial carrier protein Aralar1	1	108.45	AGQTTYSGVVDCFR(1)K
Q8BH95	54	Enoyl-CoA hydratase, mitochondrial	1	93.424	NSSVGLIQLNR(1)PK
Q8BI84	1736	Melanoma inhibitory activity protein 3	1	191.37	SEFGSLDR(1)HLPRPR
Q8BJ64	209	Choline dehydrogenase, mitochondrial	1	85.469	TNHPLHQAFLQAAR(1)
Q8BJH1	226	Zinc finger C2HC domain-containing protein 1A	1	41.89	ASSVNSPLGNKPQTLSPSHR(1)AIAAPQAGANTK
Q8BJH1	249	Zinc finger C2HC domain-containing protein 1A	0.999839	82.086	ARNTTPPSLAR(1)NSVAGVLTNK
Q8BLR2	509	Copine-4	1	105.03	DIVQFVPFR(1)NFK
Q8BM75	948	AT-rich interactive domain-containing protein 5B	1	72.898	GASQFQVVSNQSR(1)
Q8BMS1	125	Trifunctional enzyme subunit alpha, mitochondrial	1	172.59	ISQEGQR(1)
Q8BUV3	485	Gephyrin	0.800932	51.469	ILVQAR(0.801)PGQDIR(0.199)PIGHDIK
Q8BUV3	16	Gephyrin	1	130.01	ATEGMILTNHDHQIR(1)
Q8BWF0	418	Succinate-semialdehyde dehydrogenase, mitochondrial	1	77.576	RHQSGGNFFEPTLLSNVTR(1)
Q8BWF0	400	Succinate-semialdehyde dehydrogenase, mitochondrial	1	120.63	R(1)HQSGGNFFEPTLLSNVTR
Q8BWT1	181	3-ketoacyl-CoA thiolase, mitochondrial	0.989825	98.543	YNISR(0.003)EDCDR(0.99)YALQSQQR(0.007)
Q8BWT1	90	3-ketoacyl-CoA thiolase, mitochondrial	1	129.46	VGVPTETGALTLNR(1)
Q8BWT1	224	3-ketoacyl-CoA thiolase, mitochondrial	1	134.68	QTMQVDEHAR(1)PQTTLEQLQK
Q8BWT1	189	3-ketoacyl-CoA thiolase, mitochondrial	1	202.63	YNISREDCDRYALQSQQR(1)
Q8BXK9	109	Chloride intracellular channel protein 5	1	144.72	HR(1)ESNTAGIDIFSK
Q8C196	286	Carbamoyl-phosphate synthase [ammonia], mitochondrial	1	51.473	ILESDR(1)KEPLFGISTGNIITGLAAGAK
Q8C196	1292	Carbamoyl-phosphate synthase [ammonia], mitochondrial	1	59.372	R(1)LPTLEQPIIPSDYVAIK
Q8C196	1089	Carbamoyl-phosphate synthase [ammonia], mitochondrial	0.825427	89.468	IMGTSPLQIDR(0.175)AEDR(0.825)
Q8C196	328	Carbamoyl-phosphate synthase [ammonia], mitochondrial	1	114.54	GQNQPVLNITNR(1)
Q8C196	1259	Carbamoyl-phosphate synthase [ammonia], mitochondrial	1	114.63	GNDVLVIECNLR(1)
Q8C196	1085	Carbamoyl-phosphate synthase [ammonia], mitochondrial	1	162.37	IMGTSPLQIDR(1)
Q8C196	929	Carbamoyl-phosphate synthase [ammonia], mitochondrial	1	178.22	CLGLTEAQTR(1)
Q8C196	112	Carbamoyl-phosphate synthase [ammonia], mitochondrial	1	245.87	GQILTMANPIIGNGGAPDTTAR(1)DELGLNK
Q8C8R3	308	Ankyrin-2	1	76.82	TRDGLTPLHCAAR(1)
Q8CAQ8	365	MICOS complex subunit Mic60	1	119.46	VVSQYHELVVQAR(1)
Q8CAQ8	465	MICOS complex subunit Mic60	1	121.24	SEIQAEQDR(1)K
Q8CAQ8	546	MICOS complex subunit Mic60	1	124.17	LR(1)GIEQAVQSHAVAEEEARK
Q8CAQ8	409	MICOS complex subunit Mic60	1	139.88	LSTDDLNSLIAHAHR(1)
Q8CAY6	361	Acetyl-CoA acetyltransferase, cytosolic	1	78.128	VNIDGGAIALGHPLGASGCR(1)
Q8CC35	493	Synaptopodin	0.999938	47.564	TARPFGIQSPGTSQIEQSPMMGR(1)
Q8CC35	564	Synaptopodin	0.999989	50.202	RPLGNFTPPPTYAETLSTAPVASR(1)
Q8CC35	668	Synaptopodin	1	83.312	DHGEVGMEEEPFALGAEASNFQQEPIAR(1)
Q8CGP2	80	Histone H2B type 1-P	1	96.247	IASEASR(1)LAHYNK
Q8CGP2	93	Histone H2B type 1-P	0.99995	98.188	RSTITSR(1)EIQTAVR
Q8CHH9	84	Septin-8	1	94.234	LR(1)PQTYDLQESNVHLK
Q8CHH9	422	Septin-8	1	169.26	AAMEALQSQALHATSQQPLR(1)K
Q8CHT6	260	Protein FAM169B	1	58.712	LWEVEPPGAWGQQR(1)VNIWLK
Q8CIB5	424	Fermitin family homolog 2	1	118.54	SREESSGTPAHQLNLR(1)
Q8CIE6	260	Coatomer subunit alpha	1	69.331	GHYNNVSCAVFHPR(1)
Q8K0C5	37	Zymogen granule membrane protein 16	0.999999	64.454	R(1)FSHSGNQLDGPITAFR
Q8K0C5	140	Zymogen granule membrane protein 16	1	64.522	ASGTSFNAVPLHPNTVLR(1)
Q8K0L3	108	Acyl-coenzyme A synthetase ACSM2, mitochondrial	0.831888	87.319	QTANVLSGACGLHR(0.168)GDR(0.832)
Q8K0L3	105	Acyl-coenzyme A synthetase ACSM2, mitochondrial	0.978124	134.29	QTANVLSGACGLHR(0.978)GDR(0.022)
Q8K0T0	237	Reticulon-1	1	74.029	AEGVR(1)APNQPAPVEGK
Q8K0T0	273	Reticulon-1	1	89.055	DHLFEESTFAPYIDELSDEQHR(1)
Q8K0T0	201	Reticulon-1	1	112.08	YIDITR(1)PQEAK
Q8K0T0	375	Reticulon-1	1	137.62	GLSYETTESPR(1)PVGQVADKPK
Q8K183	292	Pyridoxal kinase	1	113.42	AEAGEGQKPSPAQLELR(1)
Q8K183	269	Pyridoxal kinase	1	147.26	TVSAMQHVLQR(1)
Q8K1M6	61	Dynamin-1-like protein	1	67.418	R(1)PLILQLVHVSPEDK
Q8K202	430	DNA-directed RNA polymerase I subunit RPA49	1	76.378	LSEKR(1)MIEIAKAMR(1)
Q8K202	439	DNA-directed RNA polymerase I subunit RPA49	1	76.378	LSEKR(1)MIEIAKAMR(1)
Q8K2B3	476	Succinate dehydrogenase [ubiquinone] flavoprotein subunit, mitochondrial	1	155.17	ACALSIAESCR(1)PGDKVPSIK
Q8K310	231	Matrin-3	1	122.3	CR(1)DDSFFGETSHNYHK
Q8K310	407	Matrin-3	1	130.56	VVHIMDFQR(1)
Q8K310	12	Matrin-3	0.999698	134.29	SFQQSSLGR(1)DSQGHGR
Q8K310	186	Matrin-3	1	161.49	R(1)DSFDDRGPSLNPVLDYDHGSR
Q8R001	291	Microtubule-associated protein RP/EB family member 2	0.999968	48.616	LREIELLCQEHGQENDDLVQR(1)
Q8R071	146	Inositol-trisphosphate 3-kinase A	1	71.299	RLSTSSLSSTGSSSLLEDSEDDLLSDSESR(1)
Q8R086	269	Sulfite oxidase, mitochondrial	0.840111	81.346	HEVTVTLQCAGNR(0.84)R(0.16)
Q8R0F9	275	SEC14-like protein 4	0.922686	67.217	R(0.077)YYLSNQER(0.923)PQYEHSVVVGR
Q8R0Y6	742	Cytosolic 10-formyltetrahydrofolate dehydrogenase	0.995058	51.811	IGNPLDR(0.995)DTNHGPQNHEAHLR(0.005)K
Q8R0Y6	756	Cytosolic 10-formyltetrahydrofolate dehydrogenase	0.999891	68.657	IGNPLDRDTNHGPQNHEAHLR(1)K
Q8R0Y6	551	Cytosolic 10-formyltetrahydrofolate dehydrogenase	0.854161	98.062	IQGATIPINQAR(0.854)PNR(0.146)
Q8R0Y6	191	Cytosolic 10-formyltetrahydrofolate dehydrogenase	1	164.01	R(1)PQPEEGATYEGIQK
Q8R164	249	Valacyclovir hydrolase	1	56.081	HLLPLVQCPTLIVHGEKDPLVPR(1)
Q8R164	55	Valacyclovir hydrolase	1	158.58	VAVNGVHLHYQR(1)
Q8R1F5	155	Putative hydroxypyruvate isomerase	1	57.366	HAAGVLAQENLVGLLEPINTR(1)
Q8R3P0	187	Aspartoacylase	1	78.428	SIAKYPVGIEVGPQPHGVLR(1)
Q8R3V5	251	Endophilin-B2	1	60.093	LLLEGISSTHVNHLR(1)
Q8R4G6	56	Alpha-1,6-mannosylglycoprotein 6-beta-N-acetylglucosaminyltransferase A	1	56.681	EQILDLSKR(1)YIKALAEENR(1)
Q8R4G6	66	Alpha-1,6-mannosylglycoprotein 6-beta-N-acetylglucosaminyltransferase A	1	56.681	EQILDLSKR(1)YIKALAEENR(1)
Q8VC30	410	Bifunctional ATP-dependent dihydroxyacetone kinase/FAD-AMP lyase (cyclizing)	1	91.355	AAGDGDCGSTHSR(1)
Q8VC30	152	Bifunctional ATP-dependent dihydroxyacetone kinase/FAD-AMP lyase (cyclizing)	1	121.18	R(1)GLCGTVLIHK
Q8VCT4	286	Carboxylesterase 1D	1	92.939	TTTSAVMVHCLR(1)
Q8VCT4	536	Carboxylesterase 1D	1	153.32	IGASTQAAQR(1)
Q8VCW8	290	Acyl-CoA synthetase family member 2, mitochondrial	1	205.9	GATLSHHNIVNNSMLIGQR(1)
Q8VDD5	1703	Myosin-9	0.949068	118.05	R(0.051)QAQQER(0.949)DELADEIANSSGK
Q8VDD5	1697	Myosin-9	0.850305	126.27	R(0.85)QAQQER(0.15)DELADEIANSSGK
Q8VDD5	1888	Myosin-9	1	141.78	RQLEEAEEEAQR(1)
Q8VDD5	1191	Myosin-9	1	143.25	THEAQIQEMR(1)
Q8VDJ3	912	Vigilin	0.999982	49.623	DYNVQIKFPDR(1)EENPVHSVEPSIQENGDEAGEGR
Q8VDJ3	935	Vigilin	1	108.55	DYNVQIKFPDREENPVHSVEPSIQENGDEAGEGR(1)
Q8VDQ8	153	NAD-dependent protein deacetylase sirtuin-2	1	92.098	ELYPGQFKPTICHYFIR(1)
Q8VDQ8	57	NAD-dependent protein deacetylase sirtuin-2	1	107.72	NLFTQTLGLGSQKER(1)
Q8VE73	363	Cullin-7	1	75.018	ASFASFNTYALYVR(1)
Q8VEK3	68	Heterogeneous nuclear ribonucleoprotein U	0.959815	46.577	LQAALDNEAGGR(0.04)PAMEPGNGSLDLGGDAAGR(0.96)
Q8VEK3	551	Heterogeneous nuclear ribonucleoprotein U	1	84.508	R(1)NFILDQTNVSAAAQR
Q8VEK3	231	Heterogeneous nuclear ribonucleoprotein U	1	86.573	EDHGR(1)GYFEYIEENK
Q8VEK3	566	Heterogeneous nuclear ribonucleoprotein U	1	156.67	RNFILDQTNVSAAAQR(1)
Q8VEM8	196	Phosphate carrier protein, mitochondrial	1	104.82	VRIQTQPGYANTLR(1)
Q8VEM8	184	Phosphate carrier protein, mitochondrial	1	124.29	VR(1)IQTQPGYANTLR
Q8VHG2	554	Angiomotin	1	64.454	HIEIR(1)DQALSNAQAK
Q8VIJ6	528	Splicing factor, proline- and glutamine-rich	1	167.61	LESEMEDAYHEHQANLLR(1)
Q91V41	201	Ras-related protein Rab-14	1	107.59	IYQNIQDGSLDLNAAESGVQHKPSAPQGGR(1)
Q91VD9	483	NADH-ubiquinone oxidoreductase 75 kDa subunit, mitochondrial	1	80.905	KPMVVLGSSALQR(1)
Q91VW3	47	SH3 domain-binding glutamic acid-rich-like protein 3	0.981699	86.08	RIQYQLVDISQDNALR(0.982)DEMR(0.018)
Q91W64	356	Cytochrome P450 2C70	1	70.094	NHMPYTDAVLHEIQR(1)
Q91WD5	96	NADH dehydrogenase [ubiquinone] iron-sulfur protein 2, mitochondrial	1	133.76	AVTNMTLNFGPQHPAAHGVLR(1)
Q91WS4	335	S-methylmethionine--homocysteine S-methyltransferase BHMT2	1	117.48	HGSWGSGLNMHTKPWIR(1)
Q91WU0	536	Carboxylesterase 1F	1	67.685	EGYLHIGGTTQQAQR(1)
Q91WU0	286	Carboxylesterase 1F	1	82.651	TTTSAVIVHCMR(1)
Q91WU0	458	Carboxylesterase 1F	1	165.13	GHRDTGAPTYMYEYQYYPSFSSPQR(1)PK
Q91WV7	663	Neutral and basic amino acid transport protein rBAT	1	53.481	GEGLVLEHSTKAPLHQQAAFR(1)
Q91X83	265	S-adenosylmethionine synthase isoform type-1	1	71.592	FVIGGPQGDAGVTGR(1)K
Q91X83	250	S-adenosylmethionine synthase isoform type-1	1	148.38	YLDEDTVYHLQPSGR(1)
Q91XC8	25	Death-associated protein 1	1	122.47	AGGMR(1)IVQKHPHTGDGK
Q91XC8	93	Death-associated protein 1	1	144.97	HVSPR(1)TQHIQQPR
Q91XC8	101	Death-associated protein 1	1	148.56	TQHIQQPR(1)
Q91XE4	32	N-acyl-aromatic-L-amino acid amidohydrolase (carboxylate-forming)	1	69.071	VAVTGGTHGNEMCGVYLAR(1)
Q91XE4	255	N-acyl-aromatic-L-amino acid amidohydrolase (carboxylate-forming)	1	162.19	TADGDLAGTVHPQLQDHDFEPLR(1)PGEPIFK
Q91Y97	56	Fructose-bisphosphate aldolase B	0.99833	171.67	VENTEENR(0.998)R(0.002)
Q91Y97	43	Fructose-bisphosphate aldolase B	1	194.19	GILAADESVGTMGNR(1)
Q91Y97	22	Fructose-bisphosphate aldolase B	1	206.74	KELSEIAQR(1)
Q91Z83	1677	Myosin-7	1	114.72	R(1)NNLLQAELEELR
Q921H8	385	3-ketoacyl-CoA thiolase A, peroxisomal	1	66.017	VNPLGGAIALGHPLGCTGAR(1)
Q921H8	249	3-ketoacyl-CoA thiolase A, peroxisomal	1	101.45	TITVSQDEGVR(1)PSTTMQGLAK
Q921I1	239	Serotransferrin	0.999992	65.624	ADR(1)DQYELLCLDNTRKPVDQYEDCYLAR
Q921I1	264	Serotransferrin	0.999665	67.553	ADRDQYELLCLDNTRKPVDQYEDCYLAR(1)
Q921I1	588	Serotransferrin	1	69.986	QEDFELLCPDGTR(1)KPVK
Q921I1	251	Serotransferrin	1	105.35	ADRDQYELLCLDNTR(1)KPVDQYEDCYLAR
Q921I1	610	Serotransferrin	1	112.85	DFASCHLAQAPNHVVVSR(1)K
Q921M7	64	Protein FAM49B	0.829716	69.071	DAEGILEDLQSYR(0.17)GAGHEIR(0.83)
Q922Q8	96	Leucine-rich repeat-containing protein 59	1	106.93	LVNLQHLDLLNNR(1)
Q923D2	39	Flavin reductase (NADPH)	1	92.463	DSSR(1)LPSEGPQPAHVVVGDVR
Q923D2	56	Flavin reductase (NADPH)	1	124.51	DSSRLPSEGPQPAHVVVGDVR(1)
Q923K4	18	tRNA modification GTPase GTPBP3, mitochondrial	0.999978	47.499	MWRGLSALVTQAAWAPLR(1)LCAR(1)
Q923K4	22	tRNA modification GTPase GTPBP3, mitochondrial	0.999971	47.499	MWRGLSALVTQAAWAPLR(1)LCAR(1)
Q925B0	247	PRKC apoptosis WT1 regulator protein	1	86.18	HNR(1)DANAPASFSSSSTLEK
Q99JP6	285	Homer protein homolog 3	0.999994	59.975	EAPDTAER(1)EETQQQVQDLETR
Q99JY9	374	Actin-related protein 3	1	126.04	LKPKPIDVQVITHHMQR(1)
Q99KI0	607	Aconitate hydratase, mitochondrial	1	94.767	FR(1)GHLDNISNNLLIGAINIENGK
Q99KI0	555	Aconitate hydratase, mitochondrial	1	103.9	DSSGQR(1)VDVSPTSQR
Q99KI0	58	Aconitate hydratase, mitochondrial	0.999528	128.76	R(1)LNRPLTLSEK
Q99KI0	84	Aconitate hydratase, mitochondrial	1	134.33	IVYGHLDDPANQEIER(1)
Q99KI0	774	Aconitate hydratase, mitochondrial	1	155.84	AGSALNR(1)
Q99KI0	424	Aconitate hydratase, mitochondrial	1	163.18	SQFTITPGSEQIR(1)
Q99KI0	564	Aconitate hydratase, mitochondrial	1	174.05	VDVSPTSQR(1)
Q99KI0	474	Aconitate hydratase, mitochondrial	1	189.24	NTIVTSYNR(1)
Q99KJ8	78	Dynactin subunit 2	1	52.814	R(1)TGYESGDYEMLGEGLGVK
Q99KJ8	213	Dynactin subunit 2	1	98.657	ATAGAPPDSSLVTYELHSR(1)PEQDK
Q99KJ8	319	Dynactin subunit 2	1	110.92	VHQLYETIQR(1)
Q99KV1	56	DnaJ homolog subfamily B member 11	1	80.786	LALQLHPDR(1)NPDDPQAQEK
Q99LC3	326	NADH dehydrogenase [ubiquinone] 1 alpha subcomplex subunit 10, mitochondrial	1	44.863	TEVLNYTTIPVYLPEITIGAHQGSR(1)
Q99LC5	249	Electron transfer flavoprotein subunit alpha, mitochondrial	1	100.28	LLYDLADQLHAAVGASR(1)
Q99LX0	48	Protein DJ-1	1	163.18	VTVAGLAGKDPVQCSR(1)
Q99N28	176	Cell adhesion molecule 3	1	130.21	GDQELHGDQTR(1)
Q99P30	3	Peroxisomal coenzyme A diphosphatase NUDT7	0.99931	59.539	SR(0.999)PCGLPEPVR(0.001)NNLIDDAK
Q99PL5	1394	Ribosome-binding protein 1	1	59.893	GELESSDQVR(1)EHTSHLEAELEK
Q99PT1	49	Rho GDP-dissociation inhibitor 1	1	130.56	SIQEIQELDKDDESLR(1)K
Q9CPP6	23	NADH dehydrogenase [ubiquinone] 1 alpha subcomplex subunit 5	1	120.4	TTGLVGLAVCDTPHER(1)
Q9CPQ1	13	Cytochrome c oxidase subunit 6C	1	143.46	SSGALLPKPQMR(1)
Q9CPR4	135	60S ribosomal protein L17	1	76.294	AHGR(1)INPYMSSPCHIEMILTEK
Q9CPW5	96	Translocon-associated protein subunit beta	1	82.609	IAPASNVSHTVVLR(1)PLK
Q9CQ52	189	Chymotrypsin-like elastase family member 3B	1	82.635	LQQALLPVVDYEHCSR(1)
Q9CQ62	119	2,4-dienoyl-CoA reductase, mitochondrial	1	171.72	CDVR(1)DPDMVHNTVLELIK
Q9CQ69	25	Cytochrome b-c1 complex subunit 8	1	231.52	IRHVISYSLSPFEQR(1)
Q9CQC2	44	Colipase	1	141.6	SR(1)CCQHDTILGIAR
Q9CQQ7	196	ATP synthase F(0) complex subunit B1, mitochondrial	1	76.586	NR(1)LDYHISVQNMMR
Q9CQQ7	208	ATP synthase F(0) complex subunit B1, mitochondrial	1	92.264	NRLDYHISVQNMMR(1)
Q9CQQ7	171	ATP synthase F(0) complex subunit B1, mitochondrial	1	145.29	RHYLFDVQR(1)
Q9CQV8	43	14-3-3 protein beta/alpha	1	179.46	AVTEQGHELSNEER(1)
Q9CQX8	98	28S ribosomal protein S36, mitochondrial	1	94.281	RKPMSQEEMEFIQR(1)
Q9CQX8	27	28S ribosomal protein S36, mitochondrial	0.8491	99.092	VVQVVKPHAPLIKFPNR(0.849)R(0.151)
Q9CR51	78	V-type proton ATPase subunit G 1	1	50.271	EAAALGSHGSCSSEVEKETR(1)
Q9CR62	158	Mitochondrial 2-oxoglutarate/malate carrier protein	0.99992	115.8	MTADGRLPADQR(1)
Q9CR68	196	Cytochrome b-c1 complex subunit Rieske, mitochondrial	0.999953	187.29	KEIDQEAAVEVSQLR(1)DPQHDLDR
Q9CWF2	156	Tubulin beta-2B chain	0.840248	53.625	IR(0.84)EEYPDR(0.16)IMNTFSVMPSPK
Q9CWF2	162	Tubulin beta-2B chain	0.799194	72.302	IR(0.201)EEYPDR(0.799)IMNTFSVMPSPK
Q9CWF2	46	Tubulin beta-2B chain	1	174.46	FWEVISDEHGIDPTGSYHGDSDLQLER(1)
Q9CWU5	125	KH domain-containing protein 3	0.860953	95.067	LMEIEALEAGVER(0.861)R(0.139)
Q9CY02	65	Alpha-hemoglobin-stabilizing protein	1	205.98	LVHGEQEEQDR(1)
Q9CY58	201	Plasminogen activator inhibitor 1 RNA-binding protein	1	199.99	HSGSDR(1)SSFSHYSGLK
Q9CZ13	415	Cytochrome b-c1 complex subunit 1, mitochondrial	1	93.21	NALVSHLDGTTPVCEDIGR(1)
Q9CZ13	222	Cytochrome b-c1 complex subunit 1, mitochondrial	1	148.18	TDLTDYLNR(1)
Q9CZ44	136	NSFL1 cofactor p47	1	82.349	EHGAVAVER(1)VTK
Q9D051	49	Pyruvate dehydrogenase E1 component subunit beta, mitochondrial	1	88.565	EAINQGMDEELER(1)DEK
Q9D0E1	428	Heterogeneous nuclear ribonucleoprotein M	0.999982	91.238	MGAGLGHGMDR(1)VGSEIER
Q9D0F3	381	Protein ERGIC-53	1	48.597	R(1)GAGTPGQPGQVSQQELDTVVK
Q9D0F9	23	Phosphoglucomutase-1	1	87.352	TQAYPDQKPGTSGLR(1)K
Q9D0M3	186	Cytochrome c1, heme protein, mitochondrial	1	71.853	LSDYFPKPYPNPEAAR(1)
Q9D0M3	167	Cytochrome c1, heme protein, mitochondrial	1	95.195	ALAEEVEVQDGPNDDGEMFMR(1)PGK
Q9D1M7	80	Peptidyl-prolyl cis-trans isomerase FKBP11	1	127.01	IIDTSLTR(1)DPLVIELGQK
Q9D2P8	90	Myelin-associated oligodendrocyte basic protein	1	84.327	HQPAASPVVVR(1)APPAKPK
Q9D6J6	87	NADH dehydrogenase [ubiquinone] flavoprotein 2, mitochondrial	1	71.678	NYPEGHQAAAVLPVLDLAQR(1)
Q9D6J6	142	NADH dehydrogenase [ubiquinone] flavoprotein 2, mitochondrial	1	92.38	YHIQVCTTTPCMLR(1)
Q9D6J6	153	NADH dehydrogenase [ubiquinone] flavoprotein 2, mitochondrial	1	176.29	DSDSILETLQR(1)K
Q9D6M3	44	Mitochondrial glutamate carrier 1	1	112.44	TRLQNQQNGQR(1)
Q9D6M3	273	Mitochondrial glutamate carrier 1	1	134.86	GVNEDTYSGFLDCAR(1)K
Q9D6R2	115	Isocitrate dehydrogenase [NAD] subunit alpha, mitochondrial	1	99.064	GPLKTPIAAGHPSMNLLLR(1)K
Q9D7P7	158	Chloride intracellular channel protein 3	1	67.645	APLDHELAQEPHLR(1)
Q9D8B4	20	NADH dehydrogenase [ubiquinone] 1 alpha subcomplex subunit 11	1	101.75	RFFESYHEVPDGTQCHR(1)K
Q9D8B7	303	Junctional adhesion molecule C	1	156.6	TSEEGDFR(1)HK
Q9D8E6	33	60S ribosomal protein L4	0.999998	90.464	APIR(1)PDIVNFVHTNLRK
Q9D8E6	97	60S ribosomal protein L4	1	137.81	SGQGAFGNMCR(1)
Q9D8E6	45	60S ribosomal protein L4	1	183.01	APIRPDIVNFVHTNLR(1)K
Q9D8E6	49	60S ribosomal protein L4	1	221.85	NNR(1)QPYAVSELAGHQTSAESWGTGR
Q9D8N0	45	Elongation factor 1-gamma	1	133.21	VLSAPPHFHFGQTNR(1)
Q9D8S3	313	ADP-ribosylation factor GTPase-activating protein 3	1	101.34	LGMGFGSCR(1)SGISHSVTSDMQTIEQESPTLAKPR
Q9D8S3	399	ADP-ribosylation factor GTPase-activating protein 3	1	156.73	DSSRDPEPAMR(1)STGSSDRPSAR
Q9D8Y0	77	EF-hand domain-containing protein D2	0.999996	77.221	RADLNQGIGEPQSPSR(1)
Q9DAS9	48	Guanine nucleotide-binding protein G(I)/G(S)/G(O) subunit gamma-12	1	78.78	ASADLMSYCEEHAR(1)
Q9DB77	84	Cytochrome b-c1 complex subunit 2, mitochondrial	1	79.942	YEDSNNLGTSHLLR(1)
Q9DB77	70	Cytochrome b-c1 complex subunit 2, mitochondrial	1	83.395	AGSR(1)YEDSNNLGTSHLLR
Q9DB77	217	Cytochrome b-c1 complex subunit 2, mitochondrial	1	137.72	ITSEELHYFVQNHFTSAR(1)
Q9DB77	301	Cytochrome b-c1 complex subunit 2, mitochondrial	1	167.99	R(1)GNNTTSLLSQSVAK
Q9DB77	172	Cytochrome b-c1 complex subunit 2, mitochondrial	1	219.42	AVAFQNSQTR(1)
Q9DBG3	127	AP-2 complex subunit beta	1	121.24	ITEYLCEPLR(1)K
Q9DBG6	289	Dolichyl-diphosphooligosaccharide--protein glycosyltransferase subunit 2	1	73.212	YHVPVVVVPEGSTSDTQEQAILR(1)
Q9DBJ1	240	Phosphoglycerate mutase 1	1	85.881	NLKPIKPMQFLGDEETVR(1)K
Q9DBM2	599	Peroxisomal bifunctional enzyme	1	115.54	IHKPDPWLSEFLSQYR(1)
Q9DC50	197	Peroxisomal carnitine O-octanoyltransferase	1	145.88	TESEGHCPTHIAVLCR(1)
Q9DCJ5	147	NADH dehydrogenase [ubiquinone] 1 alpha subcomplex subunit 8	1	101.17	AR(1)PEPNPVIEGDLKPAK
Q9DCN2	219	NADH-cytochrome b5 reductase 3	0.828939	62.589	DILLR(0.829)PELEELR(0.17)NEHSAR(0.001)
Q9DCN2	226	NADH-cytochrome b5 reductase 3	0.946832	134.68	DILLRPELEELR(0.947)NEHSAR(0.053)
Q9DCP2	34	Sodium-coupled neutral amino acid transporter 3	1	65.855	HLEGLLPVGVPTTDTQR(1)
Q9DCT2	230	NADH dehydrogenase [ubiquinone] iron-sulfur protein 3, mitochondrial	1	96.562	RVVAEPVELAQEFR(1)K
Q9DCW4	106	Electron transfer flavoprotein subunit beta	1	125.35	GIHVEIPGAQAESLGPLQVAR(1)
Q9DCW4	233	Electron transfer flavoprotein subunit beta	1	167.37	VSVISVEEPPQR(1)
Q9DCX2	111	ATP synthase subunit d, mitochondrial	1	205.28	SCAEFVSGSQLR(1)
Q9EQ20	70	Methylmalonate-semialdehyde dehydrogenase [acylating], mitochondrial	1	89.434	WIDIHNPATNEVVGR(1)VPQSTK
Q9EQ20	458	Methylmalonate-semialdehyde dehydrogenase [acylating], mitochondrial	1	90.946	IVNDNPYGNGTAIFTTNGATAR(1)K
Q9EQ20	316	Methylmalonate-semialdehyde dehydrogenase [acylating], mitochondrial	1	260.53	NHGVVMPDANKENTLNQLVGAAFGAAGQR(1)
Q9EQF5	443	Dihydropyrimidinase	1	46.862	THHQAVNFNIFEGMVCHGVPLVTISR(1)
Q9EQF6	231	Dihydropyrimidinase-related protein 5	1	50.432	EALDLGITGPEGIEISHPEELEAEATHR(1)
Q9ERD7	276	Tubulin beta-3 chain	1	60.255	LHFFMPGFAPLTAR(1)
Q9ERD7	86	Tubulin beta-3 chain	1	91.643	SGAFGHLFR(1)PDNFIFGQSGAGNNWAK
Q9JHL1	292	Na(+)/H(+) exchange regulatory cofactor NHE-RF2	1	75.524	R(1)DPFQESGLHLSPTAAEAK
Q9JHL1	156	Na(+)/H(+) exchange regulatory cofactor NHE-RF2	1	98.552	R(1)GPQGYGFNLHSDK
Q9JHU4	1270	Cytoplasmic dynein 1 heavy chain 1	1	59.539	TKPVTGNLR(1)PEEALQALTIYEGK
Q9JHU4	3217	Cytoplasmic dynein 1 heavy chain 1	0.872162	76.82	IKETVDQVEELR(0.872)R(0.128)
Q9JHU4	1817	Cytoplasmic dynein 1 heavy chain 1	1	102.65	LEHLITELVHQR(1)
Q9JHU4	134	Cytoplasmic dynein 1 heavy chain 1	1	106.35	RAPVIDADKPVSSQLR(1)
Q9JI91	353	Alpha-actinin-2	0.961439	81.016	LR(0.961)ISNR(0.039)PAFMPSEGK
Q9JI91	243	Alpha-actinin-2	1	116.73	MLDAEDIVNTPKPDER(1)
Q9JI91	281	Alpha-actinin-2	1	195.72	VLAVNQENER(1)
Q9JIS5	141	Synaptic vesicle glycoprotein 2A	0.867639	124.08	GGLSDGEGPPGGR(0.132)GEAQR(0.868)
Q9JIS5	136	Synaptic vesicle glycoprotein 2A	0.97069	171.07	GGLSDGEGPPGGR(0.971)GEAQR(0.029)
Q9JJV2	56	Profilin-2	1	87.676	DR(1)EGFFTNGLTLGAK
Q9JJW5	91	Myozenin-2	1	97.203	AQINHNIAMQNGR(1)
Q9JKF1	798	Ras GTPase-activating-like protein IQGAP1	1	89.232	AYQDR(1)LAYLHSHK
Q9JKK7	159	Tropomodulin-2	1	147.1	FDEETTNGEGR(1)K
Q9JKK8	2324	Serine/threonine-protein kinase ATR	0.998488	50.827	DDLR(0.998)KDCR(0.002)LMEFNSLINK
Q9JKR6	131	Hypoxia up-regulated protein 1	1	75.533	SRFPEHELIVDPQR(1)
Q9JLJ2	223	4-trimethylaminobutyraldehyde dehydrogenase	1	85.191	AGAPPGLFNVVQGGAATGQFLCHHR(1)
Q9JLM8	5	Serine/threonine-protein kinase DCLK1	0.999999	65.184	SFGR(1)DMELEHFDERDK
Q9JLM8	15	Serine/threonine-protein kinase DCLK1	1	128.74	DMELEHFDER(1)DK
Q9JLZ3	244	Methylglutaconyl-CoA hydratase, mitochondrial	1	130.15	AVGLISHVLEQNQEGDAAYR(1)K
Q9JM96	35	Cdc42 effector protein 4	0.999	128.73	ADLTAEMISAPLGDFR(0.999)HTMHVGR(0.001)
Q9QVP4	48	Myosin regulatory light chain 2, atrial isoform	1	78.708	EAFSCIDQNR(1)DGIICK
Q9QXD6	230	Fructose-1,6-bisphosphatase 1	1	117	DFDPAINEYLQR(1)K
Q9QXF8	230	Glycine N-methyltransferase	1	96.591	AHMVTLDYTVQVPGTGR(1)DGSPGFSK
Q9QXS1	3342	Plectin	1	61.477	VYHDPSTQEPVTYSQLQQR(1)
Q9QXS1	3344	Plectin	1	93.583	CR(1)SDQLTGLSLLPLSEK
Q9QXS6	384	Drebrin	0.99998	51.473	MAPTPIPTR(1)SPSDSSTASTPIAEQIER
Q9QXV0	104	ProSAAS	1	126.42	ARAEAQEAEDQQAR(1)
Q9QXV0	92	ProSAAS	1	128.35	AR(1)AEAQEAEDQQAR
Q9QYB5	645	Gamma-adducin	1	87.519	DEMHDVEDELAQR(1)
Q9QYB8	370	Beta-adducin	0.750529	81.357	SRLGEHEFEALMR(0.751)MLDNLGYR(0.249)
Q9QYC0	507	Alpha-adducin	1	156.24	IR(1)EQNLQDIK
Q9QYR6	154	Microtubule-associated protein 1A	1	73.918	R(1)SIEEACLTLQHLNR
Q9QYR6	1690	Microtubule-associated protein 1A	0.868199	87.676	VWFPHELDGQGAR(0.868)PR(0.132)
Q9QYR6	168	Microtubule-associated protein 1A	1	100.39	RSIEEACLTLQHLNR(1)
Q9QYR6	2390	Microtubule-associated protein 1A	1	124.82	SSRPDTLLSSEQR(1)PGK
Q9QYR9	137	Acyl-coenzyme A thioesterase 2, mitochondrial	0.999911	49.765	R(1)DVQTPFLVELEVLDGHEPDGGQR
Q9QZE5	590	Coatomer subunit gamma-1	1	67.553	SVPLATTPMAEQR(1)PESTATAAVKQPEK
Q9R069	224	Basal cell adhesion molecule	1	139.19	DDR(1)DANFHCAAHYDLPSGQHGR
Q9R0H0	56	Peroxisomal acyl-coenzyme A oxidase 1	0.999999	62.303	RREIENLILNDPDFQHEDYNFLTR(1)
Q9R0H0	31	Peroxisomal acyl-coenzyme A oxidase 1	0.807086	64.589	ERAAATFNPELITHILDGSPENTR(0.807)R(0.193)
Q9R0H0	509	Peroxisomal acyl-coenzyme A oxidase 1	1	124.12	NLQAQVSHR(1)K
Q9R0K7	58	Plasma membrane calcium-transporting ATPase 2	1	74.428	IKETYGDTEAICR(1)
Q9R0K7	625	Plasma membrane calcium-transporting ATPase 2	1	89.358	KVIEPMACDGLR(1)
Q9R0K7	249	Plasma membrane calcium-transporting ATPase 2	1	196.31	IDESSLTGESDQVR(1)K
Q9R0K7	767	Plasma membrane calcium-transporting ATPase 2	1	209.79	GIIDSTHTEQR(1)
Q9R0P5	145	Destrin	1	87.157	HEYQANGPEDLNR(1)
Q9R0P5	81	Destrin	1	171.08	HFVGMLPEKDCR(1)
Q9R0P9	153	Ubiquitin carboxyl-terminal hydrolase isozyme L1	1	255.42	NEAIQAAHDSVAQEGQCR(1)VDDK
Q9R0Y5	149	Adenylate kinase isoenzyme 1	1	66.152	R(1)LETYYNATEPVISFYDK
Q9R1P4	51	Proteasome subunit alpha type-1	1	108.63	R(1)AQSELAAHQK
Q9R1V6	827	Disintegrin and metalloproteinase domain-containing protein 22	0.988774	122.64	HISDICENGR(0.989)PR(0.011)
Q9R257	152	Heme-binding protein 1	1	79.837	EADYVAHATQLR(1)
Q9WTP3	279	SAM pointed domain-containing Ets transcription factor	1	150.1	IEDSAQVAR(1)
Q9WTP6	202	Adenylate kinase 2, mitochondrial	1	78.078	TRLEAYHTQTTPLVEYYR(1)
Q9WTP6	186	Adenylate kinase 2, mitochondrial	1	103.31	TR(1)LEAYHTQTTPLVEYYRK
Q9WTT4	90	V-type proton ATPase subunit G 2	1	88.716	RQVQGMQSSQQR(1)
Q9WTT4	107	V-type proton ATPase subunit G 2	0.99991	165.85	VLAQLLGMVCEVR(1)PQVHPNYR
Q9WTT4	48	V-type proton ATPase subunit G 2	0.904806	172.43	EEAQMEVEQYR(0.905)R(0.095)
Q9WTX5	154	S-phase kinase-associated protein 1	1	179.14	NDFTEEEEAQVR(1)K
Q9WUA3	309	ATP-dependent 6-phosphofructokinase, platelet type	1	129.89	VTILGHVQR(1)
Q9WUB3	458	Glycogen phosphorylase, muscle form	1	119.76	RINMAHLCIAGSHAVNGVAR(1)
Q9WUB3	520	Glycogen phosphorylase, muscle form	1	135.09	IGEDYISDLDQLR(1)K
Q9WUH7	708	Semaphorin-4G	0.978946	135	R(0.021)R(0.979)KYSLGR
Q9WUK2	185	Eukaryotic translation initiation factor 4H	0.998639	94.019	FR(0.999)DGPPLR(0.001)GSNMDFREPTEEER
Q9WUK2	216	Eukaryotic translation initiation factor 4H	1	98.147	LQLKPR(1)TVATPLNQVANPNSAIFGGARPR
Q9WUK2	191	Eukaryotic translation initiation factor 4H	0.999993	140.04	FRDGPPLR(1)GSNMDFREPTEEER
Q9WUK2	210	Eukaryotic translation initiation factor 4H	0.999986	186.76	AQRPR(1)LQLKPR
Q9WUL7	99	ADP-ribosylation factor-like protein 3	1	58.093	R(1)FEETGQELTELLEEEK
Q9WUR9	188	Adenylate kinase 4, mitochondrial	1	84.249	SR(1)GVLHQFSGTETNR
Q9WUR9	41	Adenylate kinase 4, mitochondrial	1	101.17	IAQNFGLQHLSSGHLLR(1)
Q9WV92	579	Band 4.1-like protein 3	1	47.082	R(1)TFLETSTETALTNEWEK
Q9WV92	777	Band 4.1-like protein 3	0.999998	57.347	EQRGEEVDQSAPEQEQPATVSHEEEQASTIR(1)
Q9WV92	749	Band 4.1-like protein 3	1	70.57	EQR(1)GEEVDQSAPEQEQPATVSHEEEQASTIR
Q9WVM8	212	Kynurenine/alpha-aminoadipate aminotransferase, mitochondrial	1	70.345	FLYTVPNGNNPTGNSLTGDR(1)K
Q9Z1G4	49	V-type proton ATPase 116 kDa subunit a isoform 1	1	122.33	DLNPDVNVFQR(1)
Q9Z1G4	286	V-type proton ATPase 116 kDa subunit a isoform 1	1	155.71	IDDLQMVLNQTEDHR(1)
Q9Z1P6	34	NADH dehydrogenase [ubiquinone] 1 alpha subcomplex subunit 7	1	127.49	R(1)TQPPPKLPVGPSHK
Q9Z1Q9	605	Valine--tRNA ligase	1	60.334	ITPAHDQNDYEVGQR(1)
Q9Z1S5	255	Neuronal-specific septin-3	1	99.409	IR(1)QESMPFAVVGSDK
Q9Z2I4	674	Roundabout homolog 3	0.999995	67.646	GLAEVAVR(1)MQEPTVLGPR
Q9Z2X1	206	Heterogeneous nuclear ribonucleoprotein F	0.999808	84.166	FMSVQR(1)PGPYDRPGTAR
Q9Z2X1	212	Heterogeneous nuclear ribonucleoprotein F	0.991975	107.72	FMSVQR(0.001)PGPYDR(0.992)PGTAR(0.007)
Q9Z2Y8	63	Proline synthase co-transcribed bacterial homolog protein	1	105.5	TKPADMVIEAYGHGQR(1)

## Sheet: Bcortex
Cit position	Protein
E9Q8I9_1937	E9Q8I9
F6SEU4_1082	F6SEU4
G5E829_320	G5E829
G5E829_716	O08553
O08553_361	O08585
O08553_238	O08599
O08553_552	O55131
O08553_268	O55143
O08553_440	O88343
O08585_128	O88569
O08599_467	O88737
O08599_477	O88935
O08599_305	O88990
O55131_380	P01117
O55143_666	P01831
O55143_246	P02088
O88343_251	P04370
O88569_185	P05063
O88737_545	P05064
O88935_430	P05202
O88935_534	P05213
O88935_352	P05214
O88990_73	P06151
P01117_41	P06745
P01831_57	P07901
P01831_35	P08226
P02088_105	P08551
P04370_195	P08553
P04370_210	P09411
P04370_242	P0DP28
P04370_181	P10637
P04370_163	P11499
P04370_165	P11798
P04370_175	P12382
P04370_228	P12787
P04370_157	P13595
P05063_56	P14094
P05063_342	P14152
P05063_201	P14873
P05063_134	P15105
P05064_134	P15532
P05064_173	P16125
P05064_56	P16330
P05064_331	P16546
P05064_43	P16858
P05202_68	P17183
P05202_81	P17710
P05213_105	P17742
P05213_221	P17751
P05213_229	P18760
P05213_339	P18872
P05214_339	P19157
P06151_157	P19246
P06745_417	P20029
P07901_621	P20152
P07901_457	P20357
P08226_214	P20917
P08551_324	P23242
P08553_380	P26443
P08553_369	P26883
P08553_256	P27661
P09411_39	P28652
P0DP28_91	P30275
P0DP28_107	P35700
P10637_534	P38647
P11499_448	P39053
P11798_283	P43006
P12382_301	P45376
P12787_94	P45952
P13595_787	P46460
P14094_136	P46660
P14152_230	P47757
P14873_1829	P48962
P15105_341	P49312
P15105_319	P50396
P15532_18	P50516
P16125_318	P50518
P16330_275	P52480
P16330_112	P56391
P16330_127	P56480
P16330_129	P56564
P16546_627	P60202
P16546_1844	P63260
P16546_1343	P60761
P16546_1273	P60879
P16546_2064	P61082
P16546_1237	P62137
P16546_18	P62259
P16858_198	P62761
P16858_232	P62806
P16858_246	P62814
P16858_78	P62874
P17183_50	P62880
P17183_429	P63001
P17710_215	P63017
P17742_69	P63054
P17751_256	P63085
P18760_146	P63101
P18872_145	P63216
P19157_202	P63321
P19246_229	P63328
P20029_61	P68033
P20029_182	P68254
P20152_450	P68372
P20357_1786	P84086
P20357_1460	P97300
P20357_51	P97351
P20917_563	P97384
P20917_582	P97427
P23242_362	P97450
P26443_496	Q01853
P26883_19	Q03265
P27661_89	Q04447
P28652_507	Q3UM45
P28652_275	Q3UYH7
P30275_375	Q60597
P35700_110	Q60598
P38647_107	Q60829
P39053_594	Q60931
P39053_343	Q60932
P39053_290	Q61553
P39053_297	Q61792
P43006_508	Q61885
P43006_528	Q61937
P45376_70	Q62261
P45952_294	Q62420
P46460_38	Q64332
P46460_314	Q64436
P46460_415	Q68FD5
P46460_533	Q6IRU5
P46460_67	Q6PIC6
P46460_303	Q6R891
P46660_300	Q7TMF3
P46660_366	Q7TQD2
P46660_83	Q7TSJ2
P46660_16	Q80TZ3
P46660_120	Q80YN3
P47757_215	Q810U3
P48962_152	Q8BG05
P49312_122	Q8BH59
P49312_300	Q8BWF0
P49312_178	Q8CAQ8
P50396_328	Q8CHH9
P50396_169	Q8CHT6
P50516_215	Q8K0T0
P50518_222	Q8K183
P50518_80	Q8K1M6
P52480_455	Q8K202
P52480_461	Q8K310
P52480_32	Q8R071
P56391_20	Q8VEM8
P56480_422	Q91V41
P56480_241	Q91VW3
P56564_505	Q91WD5
P60202_124	Q99JY9
P60202_205	Q99KI0
P63260_95	Q99KJ8
P63260_254	Q99PT1
P60761_38	Q9CPQ1
P60761_68	Q9CQ69
P60761_53	Q9CQQ7
P60879_176	Q9CQV8
P60879_17	Q9CR62
P61082_157	Q9D6J6
P62137_187	Q9D6M3
P62259_141	Q9DB77
P62761_150	Q9ERD7
P62806_36	Q9JHU4
P62814_208	Q9JIS5
P62814_82	Q9JJV2
P62874_314	Q9JKK7
P62874_150	Q9QYC0
P62874_8	Q9QYR6
P62880_150	Q9R0K7
P62880_15	Q9R0P5
P63001_163	Q9R0P9
P63017_171	Q9R1V6
P63017_100	Q9WTT4
P63017_77	Q9WTX5
P63017_236	Q9WUA3
P63017_155	Q9WUK2
P63017_36	O35098
P63054_51	O35129
P63085_299	O54782
P63101_41	O70318
P63216_17	P03995
P63321_135	P14148
P63328_254	P21107
P68033_97	P28740
P68254_138	P31938
P68372_2	P46096
P68372_380	P48758
P84086_96	P61922
P97300_149	P62242
P97351_162	P62869
P97384_334	P97315
P97427_552	P99024
P97450_54	P99029
P97450_73	Q3UNH4
Q01853_487	Q60930
Q03265_527	Q61644
Q03265_231	Q61879
Q04447_13	Q62188
Q04447_341	Q6PIE5
Q3UM45_77	Q6ZWV3
Q3UYH7_158	Q9CWF2
Q60597_1008	Q7TPR4
Q60598_97	Q8BG75
Q60829_56	Q8BH95
Q60931_252	Q8BLR2
Q60932_133	Q8BUV3
Q60932_176	Q8CC35
Q61553_82	Q8R001
Q61792_130	Q8VDQ8
Q61885_53	Q8VIJ6
Q61937_45	Q99LX0
Q62261_797	Q9CR68
Q62261_1834	Q9D051
Q62261_1844	Q9DBG3
Q62261_1245	Q9DBJ1
Q62261_1861	Q9DCP2
Q62261_2205	Q9DCX2
Q62420_296	Q9JLM8
Q64332_59	Q9JLZ3
Q64332_429	Q9QXS1
Q64436_394	Q9QYB5
Q64436_236	Q9QYB8
Q68FD5_157	Q9R1P4
Q68FD5_437	Q9WUL7
Q68FD5_444	Q9Z1G4
Q6IRU5_113	Q9Z1S5
Q6PIC6_697	P08752
Q6PIC6_43	P14231
Q6PIC6_420	P21460
Q6PIC6_492	P24788
Q6R891_370	P27773
Q7TMF3_9	P35802
Q7TQD2_55	P42669
Q7TSJ2_282	P61979
Q7TSJ2_435	P61982
Q80TZ3_277	P62281
Q80YN3_613	P62881
Q810U3_121	P62889
Q8BG05_9	P63011
Q8BG05_16	P63044
Q8BH59_565	Q02053
Q8BWF0_418	Q11011
Q8CAQ8_465	Q61097
Q8CHH9_422	Q6P2K6
Q8CHH9_84	Q80TL4
Q8CHT6_260	Q8BG39
Q8K0T0_375	Q8R3V5
Q8K183_292	Q8VEK3
Q8K183_269	Q8VHG2
Q8K1M6_61	Q99N28
Q8K202_430	Q9CPP6
Q8K202_439	Q9D8Y0
Q8K310_407	Q9DAS9
Q8R071_146	Q9EQF6
Q8VEM8_196	Q9R257
Q8VEM8_184	Q9WV92
Q91V41_201
Q91VW3_47
Q91WD5_96
Q99JY9_374
Q99KI0_564
Q99KI0_84
Q99KI0_424
Q99KJ8_319
Q99PT1_49
Q9CPQ1_13
Q9CQ69_25
Q9CQQ7_208
Q9CQV8_43
Q9CR62_158
Q9D6J6_153
Q9D6M3_273
Q9DB77_172
Q9DB77_301
Q9ERD7_86
Q9JHU4_1817
Q9JHU4_1270
Q9JIS5_136
Q9JJV2_56
Q9JKK7_159
Q9QYC0_507
Q9QYR6_2390
Q9R0K7_767
Q9R0K7_249
Q9R0K7_625
Q9R0P5_145
Q9R0P5_81
Q9R0P9_153
Q9R1V6_827
Q9WTT4_48
Q9WTT4_90
Q9WTT4_107
Q9WTX5_154
Q9WUA3_309
Q9WUK2_191
O08553_557
O35098_238
O35129_111
O54782_723
O55131_424
O55131_41
O70318_163
P03995_20
P05063_43
P05202_325
P06745_472
P09411_171
P11499_612
P14148_258
P14873_996
P15105_299
P15532_105
P16330_113
P16546_883
P17183_56
P19157_101
P19246_190
P21107_102
P23242_293
P28740_183
P31938_47
P46096_260
P46660_177
P48758_134
P50516_308
P63260_256
P61922_310
P62242_178
P62869_68
P62880_8
P63017_533
P68372_46
P68372_86
P97315_99
P99024_46
P99029_176
Q03265_405
Q04447_96
Q04447_366
Q3UNH4_672
Q60597_323
Q60930_264
Q61644_266
Q61879_700
Q62188_467
Q62261_890
Q6PIE5_493
Q6ZWV3_128
Q9CWF2_46
Q9CWF2_162
Q7TPR4_614
Q7TQD2_29
Q7TSJ2_279
Q8BG75_300
Q8BH95_54
Q8BLR2_509
Q8BUV3_16
Q8CAQ8_365
Q8CC35_493
Q8K310_231
Q8R001_291
Q8VDQ8_57
Q8VIJ6_528
Q99KI0_555
Q99LX0_48
Q9CQQ7_171
Q9CR68_196
Q9D051_49
Q9D6M3_44
Q9DBG3_127
Q9DBJ1_240
Q9DCP2_34
Q9DCX2_111
Q9JIS5_141
Q9JLM8_15
Q9JLM8_5
Q9JLZ3_244
Q9QXS1_3344
Q9QXS1_3342
Q9QYB5_645
Q9QYB8_370
Q9QYR6_168
Q9R0K7_58
Q9R1P4_51
Q9WUL7_99
Q9Z1G4_286
Q9Z1S5_255
O35129_123
O54782_715
O55143_505
O88737_3605
P05063_173
P05202_180
P05202_147
P05213_64
P06745_96
P08553_309
P08752_67
P0DP28_87
P14231_274
P16546_742
P16546_950
P16546_839
P16546_439
P18872_177
P19246_131
P20029_50
P20152_304
P20357_1488
P20917_587
P21460_44
P24788_123
P27773_207
P35802_269
P42669_139
P42669_170
P42669_198
P46460_337
P50396_173
P50396_35
P50516_232
P52480_120
P61922_436
P61979_69
P61982_42
P62259_19
P62281_118
P62881_86
P62889_56
P63011_151
P63044_66
P63044_31
P63044_30
Q02053_693
Q03265_186
Q04447_320
Q04447_130
Q11011_913
Q61097_305
Q6P2K6_635
Q9CWF2_156
Q7TQD2_164
Q80TL4_327
Q8BG39_7
Q8CAQ8_546
Q8CC35_668
Q8K0T0_237
Q8K0T0_273
Q8K0T0_201
Q8R3V5_251
Q8VEK3_566
Q8VHG2_554
Q99KI0_474
Q99N28_176
Q9CPP6_23
Q9D6J6_142
Q9D8Y0_77
Q9DAS9_48
Q9DB77_84
Q9EQF6_231
Q9ERD7_276
Q9R257_152
Q9WV92_579

## Sheet: Cerebellum
Cit position	Protein
E9Q8I9_1937	E9Q8I9
G5E829_716	G5E829
O08553_361	O08553
O08553_238	O08585
O08553_552	O08599
O08553_268	O09111
O08553_440	O35129
O08585_128	O35737
O08599_477	O54782
O08599_305	O55131
O09111_127	O55143
O35129_111	O88343
O35737_114	O88569
O54782_723	O88935
O55131_380	P01831
O55131_41	P04370
O55143_246	P05063
O55143_505	P05064
O88343_251	P05202
O88569_185	P05213
O88935_430	P05214
O88935_534	P06745
O88935_352	P07901
P01831_57	P08226
P01831_35	P08249
P04370_195	P08551
P04370_210	P08553
P04370_242	P09411
P04370_181	P0DP28
P04370_163	P10637
P04370_165	P11087
P04370_175	P11499
P04370_157	P11881
P05063_56	P12382
P05063_331	P12658
P05063_201	P12660
P05063_43	P12787
P05063_134	P14094
P05064_134	P14152
P05064_173	P14231
P05064_56	P15105
P05064_331	P15532
P05064_43	P16125
P05202_325	P16330
P05202_68	P16546
P05213_105	P16858
P05213_221	P17183
P05213_229	P17710
P05213_339	P17742
P05214_339	P17751
P06745_417	P18760
P06745_472	P18872
P07901_621	P19157
P07901_457	P19246
P08226_214	P20029
P08249_191	P20152
P08551_324	P20917
P08553_380	P21107
P08553_369	P23242
P08553_256	P26443
P09411_171	P26883
P09411_39	P27661
P0DP28_107	P27773
P10637_534	P28651
P11087_1055	P28652
P11499_612	P30275
P11499_448	P31938
P11881_2164	P35700
P12382_301	P38647
P12658_68	P39053
P12660_109	P43006
P12787_94	P45376
P14094_136	P46460
P14152_230	P46660
P14231_274	P47757
P15105_341	P47857
P15105_319	P48678
P15532_18	P48758
P15532_105	P48962
P16125_318	P49312
P16125_158	P50396
P16330_112	P50516
P16330_127	P50518
P16546_950	P52480
P16546_627	P56391
P16546_1844	P56480
P16546_1343	P56564
P16546_1273	P58252
P16546_1237	P60202
P16858_198	P63260
P16858_246	P60879
P16858_78	P61082
P17183_50	P61922
P17183_56	P61979
P17183_429	P62242
P17710_215	P62259
P17742_69	P62761
P17751_256	P62806
P18760_146	P62814
P18872_145	P62874
P19157_202	P62880
P19246_229	P63017
P19246_370	P63044
P19246_190	P63054
P19246_137	P63101
P20029_50	P63158
P20029_61	P63216
P20029_182	P63318
P20152_304	P68033
P20152_23	P68254
P20917_563	P68372
P20917_582	P84086
P20917_88	P84089
P21107_102	P97315
P23242_293	P97351
P23242_362	P97384
P26443_496	P97427
P26443_123	P97450
P26883_19	Q02053
P27661_89	Q03265
P27773_207	Q04447
P28651_276	Q08331
P28652_507	Q60597
P28652_275	Q60931
P30275_375	Q60932
P31938_47	Q61879
P35700_110	Q61937
P38647_107	Q62261
P39053_343	Q64332
P39053_290	Q64436
P43006_508	Q68FD5
P43006_528	Q6IRU5
P45376_70	Q6PIC6
P46460_38	Q6PIE5
P46460_314	Q6WVG3
P46460_415	Q7TMF3
P46460_67	Q7TSJ2
P46660_177	Q80YX1
P46660_366	Q810U3
P46660_83	Q8BG05
P46660_16	Q8BH59
P46660_120	Q8BH95
P47757_215	Q8BUV3
P47857_108	Q8BWF0
P48678_296	Q8CAQ8
P48758_134	Q8CHH9
P48962_259	Q8CHT6
P48962_152	Q8K0T0
P49312_122	Q8K183
P49312_14	Q8K2B3
P49312_300	Q8K310
P50396_328	Q8VDQ8
P50516_215	Q8VEK3
P50518_222	Q8VEM8
P52480_455	Q8VHG2
P52480_461	Q8VIJ6
P52480_32	Q99KI0
P56391_20	Q99LX0
P56480_422	Q99N28
P56480_345	Q99PT1
P56480_109	Q9CPQ1
P56480_241	Q9CQ69
P56564_505	Q9CQQ7
P58252_449	Q9CQV8
P60202_124	Q9CR68
P60202_205	Q9CZ13
P63260_95	Q9D051
P63260_254	Q9D6J6
P60879_176	Q9DAS9
P60879_17	Q9DB77
P61082_157	Q9DBG3
P61922_436	Q9DBJ1
P61922_310	Q9DCT2
P61979_191	Q9DCW4
P62242_178	Q9ERD7
P62242_184	Q9JHU4
P62259_141	Q9JIS5
P62761_150	Q9JKK7
P62806_36	Q9JLZ3
P62814_82	Q9QYB5
P62874_314	Q9QYC0
P62874_150	Q9QYR6
P62874_8	Q9R0K7
P62880_150	Q9R0P9
P63017_171	Q9R1V6
P63017_100	Q9WTX5
P63017_77	Q9WUA3
P63017_236	Q9WUB3
P63017_36	Q9Z1G4
P63044_66	Q9Z1S5
P63054_51	Q9Z2I4
P63101_41	P06151
P63158_110	P11627
P63216_17	P14148
P63318_21	P63321
P68033_97	P97467
P68254_138	Q00PI9
P68372_46	Q5SVD0
P68372_2	Q60829
P68372_380	Q61644
P84086_96	Q80YN3
P84089_13	Q8C8R3
P97315_99	Q923D2
P97351_162	Q99JP6
P97384_334	Q99JY9
P97427_552	Q99KJ8
P97450_54	Q9CR62
P97450_73	Q9QXV0
Q02053_693	Q9R0P5
Q03265_527	Q9WUR9
Q03265_405	Q9WV92
Q03265_186	O35098
Q03265_231	P01117
Q04447_96	P08752
Q04447_366	P11798
Q04447_13	P13595
Q04447_130	P20357
Q08331_244	P51859
Q60597_323	P55012
Q60597_1008	P62137
Q60597_883	P63001
Q60931_252	P63038
Q60932_133	P99029
Q60932_176	Q01853
Q61879_700	Q61885
Q61937_45	Q64521
Q62261_890	Q68FL4
Q62261_1245	Q765H6
Q62261_2205	Q9CWF2
Q64332_429	Q7TQD2
Q64436_394	Q8K202
Q64436_236	Q8R0Y6
Q68FD5_157	Q8R1F5
Q68FD5_437	Q91WD5
Q68FD5_444	Q99LC3
Q6IRU5_113	Q9D6M3
Q6PIC6_697	Q9D8B7
Q6PIC6_43	Q9WTT4
Q6PIC6_420	Q9WUH7
Q6PIC6_492
Q6PIE5_680
Q6PIE5_493
Q6WVG3_207
Q7TMF3_9
Q7TSJ2_279
Q80YX1_2029
Q810U3_121
Q810U3_449
Q8BG05_9
Q8BG05_16
Q8BH59_565
Q8BH95_54
Q8BUV3_16
Q8BWF0_400
Q8BWF0_418
Q8CAQ8_465
Q8CAQ8_365
Q8CHH9_422
Q8CHH9_84
Q8CHT6_260
Q8K0T0_237
Q8K0T0_375
Q8K0T0_201
Q8K183_292
Q8K183_269
Q8K2B3_476
Q8K310_231
Q8K310_407
Q8VDQ8_57
Q8VEK3_68
Q8VEK3_566
Q8VEM8_196
Q8VEM8_184
Q8VHG2_554
Q8VIJ6_528
Q99KI0_564
Q99KI0_84
Q99KI0_424
Q99LX0_48
Q99N28_176
Q99PT1_49
Q9CPQ1_13
Q9CQ69_25
Q9CQQ7_171
Q9CQV8_43
Q9CR68_196
Q9CZ13_415
Q9D051_49
Q9D6J6_153
Q9DAS9_48
Q9DB77_84
Q9DB77_172
Q9DB77_301
Q9DBG3_127
Q9DBJ1_240
Q9DCT2_230
Q9DCW4_106
Q9ERD7_86
Q9JHU4_1817
Q9JIS5_136
Q9JKK7_159
Q9JLZ3_244
Q9QYB5_645
Q9QYC0_507
Q9QYR6_2390
Q9R0K7_767
Q9R0K7_249
Q9R0K7_58
Q9R0K7_625
Q9R0P9_153
Q9R1V6_827
Q9WTX5_154
Q9WUA3_309
Q9WUB3_520
Q9Z1G4_286
Q9Z1S5_255
Q9Z2I4_674
O08553_227
O08553_553
O08599_467
P05063_342
P05202_81
P06151_157
P11627_43
P11881_341
P14148_264
P16858_232
P20152_28
P20917_77
P46660_300
P49312_178
P62806_37
P63017_155
P63318_632
P63321_135
P97467_462
Q00PI9_544
Q04447_320
Q04447_341
Q5SVD0_4
Q60829_56
Q61644_266
Q62261_1834
Q62261_1861
Q6PIC6_648
Q7TSJ2_282
Q80YN3_613
Q8C8R3_308
Q8VEK3_551
Q923D2_39
Q99JP6_285
Q99JY9_374
Q99KI0_58
Q99KJ8_319
Q9CR62_158
Q9DB77_217
Q9JHU4_134
Q9QXV0_104
Q9QYR6_168
Q9R0P5_145
Q9R0P5_81
Q9WUR9_41
Q9WV92_749
O35098_519
O55131_424
O55143_666
P01117_41
P04370_228
P05202_147
P05213_215
P08553_182
P08553_309
P08752_67
P0DP28_91
P11798_283
P13595_787
P14148_258
P16330_275
P16546_839
P16546_2064
P16546_18
P19246_131
P20152_450
P20357_1786
P39053_594
P39053_297
P46460_533
P46460_303
P50396_173
P51859_232
P51859_189
P52480_399
P52480_339
P52480_342
P55012_221
P63260_256
P62137_187
P62259_19
P62814_208
P63001_163
P63038_309
P63318_104
P99029_176
Q01853_487
Q61885_53
Q62261_797
Q64521_380
Q68FL4_119
Q765H6_20
Q9CWF2_46
Q7TQD2_55
Q8CAQ8_546
Q8K202_430
Q8K202_439
Q8R0Y6_191
Q8R1F5_155
Q91WD5_96
Q99KI0_474
Q99LC3_326
Q9D6J6_142
Q9D6M3_44
Q9D8B7_303
Q9WTT4_48
Q9WTT4_90
Q9WUH7_708
Q9WV92_579

## Sheet: Hypothalamus
Cit position	Protein
A2AG50_318	A2AG50
E9Q8I9_1937	E9Q8I9
O08553_361	O08553
O08553_238	O08585
O08553_552	O08599
O08553_557	O35098
O08553_268	O54782
O08553_440	O55131
O08585_128	O55143
O08599_477	O70318
O08599_305	O88343
O35098_519	O88569
O54782_723	O88935
O55131_380	O88978
O55143_246	P01117
O55143_505	P01831
O70318_163	P02088
O88343_251	P03995
O88569_185	P04370
O88935_587	P05063
O88935_430	P05064
O88935_680	P05202
O88935_352	P05213
O88978_10	P05214
P01117_41	P06151
P01831_57	P06745
P01831_35	P07901
P02088_105	P08226
P03995_102	P08249
P03995_26	P08551
P03995_20	P08553
P03995_413	P08752
P04370_195	P0DP28
P04370_210	P10637
P04370_242	Q8CGP2
P04370_181	Q6ZWY9
P04370_163	P11499
P04370_165	P11798
P04370_175	P12382
P04370_228	P12787
P04370_157	P12961
P05063_56	P13595
P05063_342	P14094
P05063_201	P14148
P05063_43	P14152
P05063_134	P14231
P05064_134	P15105
P05064_173	P15532
P05064_56	P16125
P05064_331	P16330
P05064_43	P16546
P05202_68	P16858
P05202_147	P17183
P05213_105	P17710
P05213_64	P17742
P05213_221	P17751
P05213_229	P18760
P05213_339	P19157
P05214_339	P19246
P06151_157	P20029
P06745_417	P20152
P07901_621	P20357
P07901_457	P20917
P08226_214	P23242
P08249_191	P26443
P08551_324	P26883
P08551_30	P27661
P08553_182	P27773
P08553_425	P28652
P08553_380	P30275
P08553_369	P35700
P08553_309	P38647
P08553_256	P39053
P08752_67	P43006
P0DP28_107	P45376
P10637_534	P45952
Q8CGP2_80	P46460
Q6ZWY9_80	P46660
P11499_448	P47757
P11798_283	P48962
P12382_301	P49312
P12787_94	P50396
P12961_55	P50516
P13595_787	P50518
P14094_136	P52480
P14148_258	P55012
P14152_230	P56391
P14231_274	P56480
P15105_341	P56564
P15105_319	P60202
P15532_18	P63260
P16125_318	P60761
P16125_158	P60879
P16330_275	P61922
P16330_112	P62137
P16330_113	P62141
P16330_127	P62259
P16546_950	P62281
P16546_627	P62761
P16546_1844	P62806
P16546_1343	P62814
P16546_1273	P62869
P16546_2064	P62874
P16546_18	P62880
P16858_232	P63017
P16858_246	P63054
P16858_78	P63101
P17183_56	P63216
P17183_429	P63321
P17710_215	P68033
P17742_69	P68254
P17751_256	P68372
P18760_146	P84086
P19157_202	P97315
P19246_229	P97351
P19246_370	P97384
P19246_190	P97427
P19246_137	P97450
P20029_50	Q03265
P20029_182	Q04447
P20152_28	Q60597
P20152_450	Q60598
P20357_1786	Q60829
P20357_1460	Q60930
P20357_1488	Q60931
P20917_563	Q60932
P20917_587	Q61553
P20917_582	Q61644
P20917_77	Q61792
P23242_362	Q61885
P26443_496	Q61937
P26443_123	Q62261
P26883_19	Q64332
P27661_89	Q64436
P27773_207	Q68FD5
P28652_507	Q6IRU5
P30275_375	Q6PIC6
P35700_110	Q6PIE5
P38647_107	Q7TMF3
P39053_594	Q9CWF2
P39053_343	Q7TQD2
P39053_290	Q7TSJ2
P43006_508	Q80TZ3
P43006_528	Q80YN3
P45376_70	Q810U3
P45952_294	Q8BG05
P46460_38	Q8BH59
P46460_314	Q8BH95
P46460_415	Q8BJH1
P46460_533	Q8BUV3
P46460_67	Q8BWF0
P46460_303	Q8CAQ8
P46660_366	Q8CHH9
P46660_83	Q8K0T0
P46660_16	Q8K183
P46660_120	Q8K1M6
P47757_215	Q8K202
P48962_152	Q8K310
P49312_122	Q8VDQ8
P49312_300	Q8VEM8
P49312_178	Q8VHG2
P50396_328	Q8VIJ6
P50396_169	Q91WD5
P50516_232	Q921M7
P50516_215	Q99KI0
P50518_222	Q99KJ8
P50518_80	Q99LX0
P52480_455	Q99N28
P52480_461	Q9CPQ1
P52480_32	Q9CQ69
P55012_221	Q9CQQ7
P56391_20	Q9CQV8
P56480_422	Q9CR62
P56480_109	Q9CR68
P56480_241	Q9D051
P56564_505	Q9D6J6
P60202_124	Q9D6M3
P60202_205	Q9D8B4
P63260_95	Q9D8B7
P63260_254	Q9D8Y0
P60761_38	Q9DB77
P60761_68	Q9DBG3
P60761_53	Q9DCT2
P60879_176	Q9ERD7
P60879_17	Q9JHU4
P61922_436	Q9JIS5
P61922_310	Q9JKK7
P62137_187	Q9JLZ3
P62141_313	Q9QXV0
P62259_141	Q9QYC0
P62281_118	Q9QYR6
P62761_150	Q9R0K7
P62806_36	Q9R0P5
P62814_208	Q9R0P9
P62814_82	Q9R1P4
P62869_68	Q9R1V6
P62874_314	Q9WTT4
P62874_150	Q9WTX5
P62874_8	Q9WUK2
P62880_150	Q9WV92
P62880_8	Q9Z1G4
P62880_15	Q9Z1Q9
P63017_171	Q9Z1S5
P63017_100	B9EKR1
P63017_77	O35129
P63017_236	O88342
P63017_155	P08113
P63054_51	P09411
P63101_41	P17182
P63216_17	P21107
P63321_135	P52503
P68033_97	P55088
P68254_138	P58252
P68372_2	P62881
P68372_380	P63005
P68372_86	P63011
P84086_96	P63044
P97315_99	P63328
P97351_162	P70349
P97384_334	Q01853
P97427_552	Q08331
P97450_54	Q11011
P97450_73	Q5SVD0
Q03265_527	Q60692
Q03265_186	Q61166
Q03265_231	Q62188
Q04447_96	Q62426
Q04447_13	Q62433
Q04447_341	Q8C8R3
Q04447_130	Q8CHT6
Q60597_1008	Q8R001
Q60598_97	Q8R4G6
Q60829_40	Q91VD9
Q60930_264	Q99JY9
Q60931_252	Q99PT1
Q60932_133	Q9CPP6
Q60932_176	Q9DCJ5
Q61553_82	Q9JKK8
Q61644_266	Q9WUB3
Q61792_130	Q9Z1P6
Q61885_53	O88737
Q61937_45	P00920
Q62261_797	P01193
Q62261_1834	P18872
Q62261_890	P54227
Q62261_1245	P61082
Q62261_1861	P63038
Q64332_429	P84089
Q64436_236	Q02248
Q68FD5_157	Q62420
Q68FD5_437	Q8BG75
Q68FD5_444	Q91V41
Q6IRU5_113	Q9D0F9
Q6PIC6_697	Q9JM96
Q6PIC6_648
Q6PIC6_43
Q6PIC6_420
Q6PIC6_492
Q6PIE5_493
Q7TMF3_9
Q9CWF2_46
Q7TQD2_164
Q7TSJ2_279
Q7TSJ2_282
Q7TSJ2_435
Q7TSJ2_431
Q80TZ3_277
Q80YN3_613
Q810U3_121
Q8BG05_9
Q8BH59_565
Q8BH95_54
Q8BJH1_249
Q8BUV3_16
Q8BWF0_400
Q8CAQ8_465
Q8CHH9_84
Q8K0T0_375
Q8K183_292
Q8K183_269
Q8K1M6_61
Q8K202_430
Q8K202_439
Q8K310_231
Q8K310_407
Q8VDQ8_153
Q8VDQ8_57
Q8VEM8_184
Q8VHG2_554
Q8VIJ6_528
Q91WD5_96
Q921M7_64
Q99KI0_564
Q99KI0_84
Q99KI0_474
Q99KI0_424
Q99KJ8_319
Q99LX0_48
Q99N28_176
Q9CPQ1_13
Q9CQ69_25
Q9CQQ7_171
Q9CQV8_43
Q9CR62_158
Q9CR68_196
Q9D051_49
Q9D6J6_153
Q9D6M3_44
Q9D8B4_20
Q9D8B7_303
Q9D8Y0_77
Q9DB77_172
Q9DB77_217
Q9DBG3_127
Q9DCT2_230
Q9ERD7_86
Q9JHU4_134
Q9JIS5_136
Q9JKK7_159
Q9JLZ3_244
Q9QXV0_92
Q9QXV0_104
Q9QYC0_507
Q9QYR6_2390
Q9R0K7_767
Q9R0K7_249
Q9R0K7_625
Q9R0P5_81
Q9R0P9_153
Q9R1P4_51
Q9R1V6_827
Q9WTT4_48
Q9WTT4_90
Q9WTT4_107
Q9WTX5_154
Q9WUK2_185
Q9WUK2_191
Q9WV92_579
Q9Z1G4_49
Q9Z1Q9_605
Q9Z1S5_255
B9EKR1_455
O35129_111
O88342_330
O88935_534
O88935_556
P03995_180
P03995_373
P03995_198
P04370_249
P05202_325
P06745_96
P08113_530
P09411_39
P14148_264
P15105_299
P16546_733
P16546_742
P16546_839
P17182_50
P19157_101
P19246_66
P20029_61
P21107_106
P26443_476
P46660_177
P49312_14
P52503_75
P55088_284
P56480_345
P58252_767
P63260_256
P62881_86
P63005_212
P63011_151
P63017_36
P63044_66
P63328_254
P70349_119
Q01853_349
Q01853_210
Q01853_487
Q03265_424
Q04447_366
Q08331_244
Q11011_913
Q5SVD0_4
Q60597_883
Q60692_78
Q60829_56
Q61166_162
Q62188_467
Q62261_1844
Q62426_91
Q62433_56
Q64332_59
Q64436_394
Q68FD5_1204
Q8BUV3_485
Q8BWF0_418
Q8C8R3_308
Q8CAQ8_546
Q8CAQ8_409
Q8CHH9_422
Q8CHT6_260
Q8R001_291
Q8R4G6_56
Q8R4G6_66
Q91VD9_483
Q99JY9_374
Q99KI0_607
Q99PT1_49
Q9CPP6_23
Q9CQQ7_196
Q9DCJ5_147
Q9JHU4_3217
Q9JHU4_1817
Q9JKK8_2324
Q9QYR6_168
Q9WUB3_458
Q9WUK2_210
Q9WV92_777
Q9Z1G4_286
Q9Z1P6_34
A2AG50_319
O08553_227
O88737_3605
P00920_245
P01193_170
P03995_170
P05063_331
P05202_81
P05213_215
P0DP28_91
P12961_42
P16858_198
P17183_50
P18872_145
P23242_293
P46460_337
P50396_173
P50396_35
P52480_294
P54227_14
P61082_157
P61922_285
P62259_19
P63017_533
P63038_309
P84089_13
Q02248_151
Q62420_296
Q62433_3
Q6PIE5_680
Q7TQD2_55
Q8BG75_300
Q8BJH1_226
Q91V41_201
Q9CQQ7_208
Q9D0F9_23
Q9D6J6_142
Q9DB77_301
Q9JHU4_1270
Q9JIS5_141
Q9JM96_35

## Sheet: Medulla
Cit position	Protein
A2AG50_318	A2AG50
E9Q8I9_1937	E9Q8I9
O08553_361	O08553
O08553_238	O08585
O08553_552	O08599
O08553_557	O55131
O08553_268	O70318
O08553_440	O88343
O08585_128	O88569
O08599_477	O88935
O08599_305	P00920
O55131_380	P01831
O70318_163	P03995
O88343_251	P04370
O88569_185	P05063
O88935_430	P05064
O88935_534	P05202
P00920_245	P05213
P01831_57	P05214
P01831_35	P06151
P03995_102	P06745
P03995_149	P07901
P03995_209	P08551
P03995_233	P08553
P03995_26	Q8CGP2
P03995_387	Q6ZWY9
P03995_170	P11087
P03995_180	P11499
P03995_138	P12382
P03995_159	P12787
P03995_20	P14152
P03995_413	P14231
P03995_198	P14873
P04370_195	P15105
P04370_210	P15331
P04370_242	P16125
P04370_249	P16330
P04370_181	P16546
P04370_163	P16858
P04370_165	P17183
P04370_175	P18760
P04370_228	P19157
P04370_157	P19246
P05063_56	P20029
P05063_331	P20152
P05063_342	P20357
P05063_201	P20917
P05063_43	P23242
P05063_134	P26443
P05064_134	P26883
P05064_173	P27661
P05064_56	P28652
P05064_331	P30275
P05064_43	P35700
P05202_68	P35802
P05202_81	P38647
P05213_105	P39053
P05213_221	P43006
P05213_229	P45376
P05213_339	P45952
P05214_339	P46460
P06151_157	P46660
P06745_417	P47757
P07901_457	P48962
P08551_438	P49312
P08551_324	P50396
P08551_30	P50518
P08551_23	P52480
P08553_722	P55012
P08553_182	P56391
P08553_135	P56480
P08553_425	P58252
P08553_380	P60202
P08553_369	P63260
P08553_309	P60879
P08553_256	P61922
P08553_26	P62259
Q8CGP2_93	P62761
Q6ZWY9_80	P62806
P11087_1055	P62814
P11499_448	P62874
P12382_301	P63017
P12787_94	P63054
P14152_230	P63101
P14231_274	P63321
P14873_1845	P68033
P15105_341	P68254
P15105_319	P68372
P15105_299	P97315
P15331_304	P97351
P16125_318	P97384
P16330_275	P97450
P16330_112	Q02248
P16330_113	Q03265
P16330_127	Q04447
P16546_627	Q11011
P16546_1844	Q60597
P16546_1343	Q60598
P16546_2064	Q60931
P16546_1237	Q60932
P16858_198	Q61166
P16858_232	Q61792
P16858_246	Q61885
P16858_78	Q62261
P17183_50	Q62433
P17183_56	Q64332
P17183_429	Q64436
P18760_146	Q68FD5
P19157_202	Q6IRU5
P19246_229	Q6PIC6
P19246_105	Q6PIE5
P19246_93	Q7TMF3
P19246_370	Q7TQD2
P19246_190	Q7TSJ2
P19246_131	Q80YN3
P19246_137	Q810U3
P20029_50	Q8CAQ8
P20029_61	Q8CHH9
P20152_28	Q8K1M6
P20152_450	Q8K310
P20357_1786	Q8R001
P20357_1460	Q8VEK3
P20357_1488	Q8VEM8
P20917_563	Q8VIJ6
P20917_587	Q91VW3
P20917_582	Q91WD5
P23242_362	Q99KI0
P26443_496	Q99KJ8
P26443_123	Q99N28
P26883_19	Q9CPQ1
P27661_89	Q9CQ62
P28652_507	Q9CQ69
P30275_375	Q9CQQ7
P35700_110	Q9CQV8
P35802_269	Q9CR62
P38647_107	Q9CR68
P39053_594	Q9D0F9
P39053_290	Q9D2P8
P43006_508	Q9D8B7
P43006_528	Q9DB77
P45376_70	Q9EQF6
P45952_294	Q9ERD7
P46460_38	Q9JHU4
P46460_67	Q9JIS5
P46460_303	Q9JKK7
P46660_177	Q9JLZ3
P46660_366	Q9QXV0
P46660_83	Q9QYC0
P46660_120	Q9QYR6
P47757_215	Q9R0K7
P48962_152	Q9R0P5
P49312_122	Q9R0P9
P49312_300	Q9R1V6
P49312_178	Q9WTP3
P50396_328	Q9WTT4
P50518_222	Q9WTX5
P52480_461	Q9WUK2
P52480_32	O08529
P55012_221	O54782
P56391_20	P01117
P56480_422	P02088
P56480_109	P08226
P56480_241	P0DP28
P58252_767	P10637
P60202_124	P12961
P60202_127	P14094
P60202_205	P14148
P63260_95	P15532
P63260_254	P17710
P60879_176	P17751
P60879_17	P18872
P61922_310	P24270
P62259_141	P42669
P62761_150	P50516
P62806_36	P62242
P62814_208	P62880
P62814_82	P63038
P62874_314	P99029
P62874_150	Q5SVD0
P63017_533	Q61937
P63017_171	Q6P9K8
P63017_100	Q9CWF2
P63017_77	Q8BG75
P63017_236	Q8BH95
P63017_155	Q8BM75
P63017_36	Q8BWF0
P63054_51	Q8CHT6
P63101_41	Q8K183
P63321_135	Q8K2B3
P68033_97	Q8R0Y6
P68254_138	Q8VDQ8
P68372_46	Q91V41
P68372_2	Q99JY9
P68372_380	Q99LX0
P68372_86	Q9D6J6
P97315_99	Q9JJV2
P97351_162	Q9R1P4
P97384_334	Q9WV92
P97450_54	A2AJI0
P97450_73	P09411
Q02248_151	P17742
Q03265_527	P21107
Q03265_186	P31230
Q03265_231	P47857
Q04447_96	P63011
Q04447_366	Q8BJH1
Q04447_13	Q8K0T0
Q04447_320	Q8R3P0
Q04447_341	Q91VD9
Q11011_913	Q99PT1
Q60597_1008	Q9DBJ1
Q60598_97
Q60931_252
Q60932_133
Q60932_176
Q61166_162
Q61792_130
Q61885_53
Q62261_797
Q62261_1834
Q62261_1861
Q62433_56
Q62433_3
Q64332_429
Q64436_236
Q68FD5_157
Q68FD5_437
Q68FD5_444
Q6IRU5_113
Q6PIC6_697
Q6PIC6_648
Q6PIC6_43
Q6PIC6_420
Q6PIC6_492
Q6PIE5_493
Q7TMF3_9
Q7TQD2_164
Q7TSJ2_279
Q7TSJ2_282
Q7TSJ2_435
Q80YN3_613
Q810U3_121
Q8CAQ8_409
Q8CAQ8_465
Q8CHH9_422
Q8CHH9_84
Q8K1M6_61
Q8K310_231
Q8R001_291
Q8VEK3_231
Q8VEM8_184
Q8VIJ6_528
Q91VW3_47
Q91WD5_96
Q99KI0_564
Q99KI0_424
Q99KJ8_78
Q99KJ8_319
Q99N28_176
Q9CPQ1_13
Q9CQ62_119
Q9CQ69_25
Q9CQQ7_171
Q9CQV8_43
Q9CR62_158
Q9CR68_196
Q9D0F9_23
Q9D2P8_90
Q9D8B7_303
Q9DB77_172
Q9DB77_217
Q9DB77_301
Q9EQF6_231
Q9ERD7_86
Q9JHU4_1817
Q9JHU4_134
Q9JHU4_1270
Q9JIS5_136
Q9JKK7_159
Q9JLZ3_244
Q9QXV0_92
Q9QXV0_104
Q9QYC0_507
Q9QYR6_168
Q9QYR6_2390
Q9QYR6_1690
Q9R0K7_767
Q9R0K7_249
Q9R0P5_145
Q9R0P9_153
Q9R1V6_827
Q9WTP3_279
Q9WTT4_90
Q9WTX5_154
Q9WUK2_191
O08529_77
O08599_467
O54782_723
P01117_41
P02088_105
P03995_373
P05063_173
P05213_422
P07901_621
P08226_214
P0DP28_107
P10637_534
P12961_42
P14094_136
P14148_258
P15331_310
P15532_18
P17710_215
P17751_256
P18872_145
P19246_66
P20029_533
P20029_182
P20152_23
P20917_88
P23242_293
P24270_23
P39053_343
P42669_198
P46460_533
P46660_300
P46660_16
P50516_215
P50516_308
P52480_455
P52480_399
P63260_256
P61922_436
P62242_178
P62880_150
P63038_309
P99029_176
Q04447_130
Q5SVD0_4
Q61937_45
Q64436_394
Q6P9K8_934
Q6PIE5_680
Q9CWF2_46
Q8BG75_300
Q8BH95_54
Q8BM75_948
Q8BWF0_400
Q8CHT6_260
Q8K183_292
Q8K2B3_476
Q8R0Y6_191
Q8VDQ8_153
Q91V41_201
Q99JY9_374
Q99KI0_555
Q99KI0_84
Q99KJ8_213
Q99LX0_48
Q9D6J6_153
Q9D6J6_142
Q9JJV2_56
Q9R1P4_51
Q9WTT4_48
Q9WUK2_185
Q9WV92_579
A2AJI0_383
P09411_39
P16546_839
P17742_69
P21107_102
P31230_185
P47857_420
P50396_173
P50516_232
P60879_142
P62874_8
P62880_8
P63011_151
Q03265_424
Q68FD5_1204
Q8BJH1_249
Q8CAQ8_546
Q8K0T0_375
Q8R3P0_187
Q8VEM8_196
Q91VD9_483
Q99PT1_49
Q9CQQ7_208
Q9DBJ1_240
Q9QYR6_154
Q9WTT4_107
Q9WUK2_210

## Sheet: Scortex
Cit position	Protein
E9Q8I9_1937	E9Q8I9
F6SEU4_1082	F6SEU4
O08553_361	O08553
O08553_238	O08585
O08553_552	O08599
O08553_268	O35098
O08553_440	O35129
O08585_128	O54782
O08599_477	O55131
O08599_305	O55143
O35098_519	O70318
O35129_111	O88343
O35129_123	O88569
O54782_723	O88737
O55131_380	O88935
O55143_246	O88990
O70318_163	P01117
O88343_251	P01831
O88569_185	P03995
O88737_545	P04370
O88935_430	P05063
O88935_534	P05064
O88935_680	P05202
O88935_352	P05213
O88990_73	P05214
P01117_41	P06151
P01831_57	P06745
P01831_35	P07901
P03995_102	P08226
P03995_20	P08551
P03995_413	P08553
P04370_195	P09411
P04370_210	P0DP28
P04370_242	P10637
P04370_181	Q6ZWY9
P04370_163	P11499
P04370_165	P11798
P04370_175	P12382
P04370_228	P12787
P04370_157	P13595
P05063_56	P14094
P05063_342	P14148
P05063_201	P14152
P05063_134	P14206
P05064_134	P15105
P05064_173	P15532
P05064_56	P16125
P05064_331	P16330
P05064_43	P16546
P05202_180	P16858
P05202_68	P17183
P05202_81	P17710
P05202_147	P17751
P05213_105	P18760
P05213_64	P18872
P05213_221	P19157
P05213_229	P19246
P05213_339	P20029
P05214_339	P20152
P06151_157	P20357
P06745_417	P20917
P07901_621	P21107
P07901_401	P23242
P07901_457	P26443
P08226_214	P26883
P08551_30	P27661
P08553_182	P28652
P08553_380	P28663
P08553_369	P30275
P08553_256	P31938
P09411_39	P35486
P0DP28_91	P35700
P0DP28_107	P35802
P10637_534	P38647
Q6ZWY9_80	P39053
P11499_612	P43006
P11499_448	P45376
P11798_283	P45952
P12382_301	P46460
P12787_94	P46660
P13595_787	P47757
P14094_136	P48962
P14148_264	P49312
P14152_230	P50396
P14206_155	P50516
P15105_340	P50518
P15105_341	P52480
P15105_319	P56391
P15532_18	P56480
P15532_105	P56564
P16125_318	P60202
P16330_112	P63260
P16330_127	P60761
P16546_1803	P60879
P16546_742	P61082
P16546_950	P61922
P16546_627	P61982
P16546_839	P62137
P16546_1844	P62242
P16546_1343	P62259
P16546_1273	P62761
P16546_883	P62806
P16546_18	P62814
P16858_198	P62874
P16858_232	P62880
P16858_246	P63001
P16858_78	P63017
P17183_50	P63044
P17183_56	P63054
P17183_429	P63085
P17710_215	P63101
P17751_256	P63318
P18760_146	P63321
P18872_177	P63328
P18872_145	P68033
P19157_202	P68254
P19246_190	P68372
P20029_50	P84086
P20029_61	P97300
P20029_182	P97315
P20152_28	P97351
P20152_450	P97384
P20357_1786	P97427
P20357_1460	P97450
P20357_1488	Q03265
P20917_563	Q04447
P20917_587	Q3UHL1
P21107_102	Q3UNH4
P23242_293	Q5SVD0
P23242_362	Q60598
P26443_496	Q60829
P26443_123	Q60931
P26883_19	Q60932
P27661_89	Q61553
P28652_507	Q61644
P28652_275	Q61792
P28663_271	Q61879
P30275_375	Q61885
P31938_47	Q61937
P35486_119	Q62188
P35700_110	Q62261
P35802_269	Q62420
P38647_107	Q64332
P39053_594	Q64436
P39053_343	Q68FD5
P39053_290	Q6IRU5
P43006_508	Q6PIC6
P43006_528	Q7TMF3
P45376_70	Q9CWF2
P45952_294	Q7TQD2
P46460_38	Q7TSJ2
P46460_314	Q80TZ3
P46460_415	Q8BG05
P46460_67	Q8BG75
P46460_303	Q8BH95
P46660_300	Q8BUV3
P46660_366	Q8CAQ8
P46660_83	Q8CC35
P46660_16	Q8CHH9
P46660_120	Q8CHT6
P47757_215	Q8K0T0
P48962_152	Q8K183
P49312_122	Q8K202
P49312_300	Q8K310
P49312_178	Q8VDQ8
P50396_328	Q8VEK3
P50396_169	Q8VEM8
P50396_173	Q8VIJ6
P50516_232	Q91V41
P50516_215	Q91VW3
P50518_222	Q91WD5
P52480_461	Q99JY9
P52480_32	Q99KI0
P56391_20	Q99KJ8
P56480_422	Q99LX0
P56480_241	Q99PT1
P56564_505	Q9CPQ1
P60202_124	Q9CQ69
P60202_205	Q9CQV8
P63260_95	Q9CR62
P63260_254	Q9CR68
P60761_38	Q9CZ13
P60761_68	Q9D051
P60879_176	Q9D6J6
P60879_17	Q9D6M3
P61082_157	Q9DB77
P61922_436	Q9DBG3
P61922_310	Q9DBJ1
P61982_42	Q9DCT2
P62137_187	Q9DCW4
P62242_178	Q9DCX2
P62259_141	Q9ERD7
P62761_150	Q9JHU4
P62806_36	Q9JIS5
P62814_82	Q9JJV2
P62874_314	Q9JKK7
P62874_150	Q9QXS6
P62874_8	Q9QXV0
P62880_150	Q9QYC0
P62880_8	Q9QYR6
P62880_15	Q9R0K7
P63001_163	Q9R0P5
P63017_171	Q9R0P9
P63017_100	Q9R1P4
P63017_77	Q9R1V6
P63017_236	Q9R257
P63017_155	Q9WTT4
P63017_36	Q9WTX5
P63044_66	Q9WUA3
P63044_31	Q9WUK2
P63054_51	Q9Z1G4
P63085_299	Q9Z1S5
P63101_41	B9EKR1
P63318_21	D3YVF0
P63321_135	P08752
P63328_254	P17742
P68033_97	P27773
P68254_138	P42669
P68372_2	P62881
P68372_380	P84089
P84086_96	Q6PIE5
P97300_149	Q8C8R3
P97315_99	Q8K2B3
P97351_162	Q99N28
P97384_334	Q9CQQ7
P97427_552	Q9D8Y0
P97450_54	Q9JLZ3
P97450_73	O88342
Q03265_527	P08249
Q03265_186	P14873
Q03265_231	P28740
Q04447_366	P54227
Q04447_13	P55012
Q04447_341	P63011
Q3UHL1_23	P70404
Q3UNH4_672	Q60930
Q5SVD0_4	Q61097
Q60598_97	Q62433
Q60829_56	Q80YN3
Q60931_252	Q8BWF0
Q60932_133	Q8K1M6
Q60932_176	Q8R3V5
Q61553_82	Q91VD9
Q61644_196	Q9D8B7
Q61792_130	Q9EQF6
Q61879_700	Q9JM96
Q61885_53	Q9WUH7
Q61937_45
Q62188_467
Q62261_797
Q62261_1834
Q62261_1844
Q62261_890
Q62261_1245
Q62261_1861
Q62420_296
Q64332_59
Q64332_429
Q64436_236
Q68FD5_157
Q68FD5_437
Q68FD5_444
Q6IRU5_113
Q6PIC6_697
Q6PIC6_648
Q6PIC6_43
Q6PIC6_420
Q6PIC6_492
Q7TMF3_9
Q9CWF2_46
Q7TQD2_164
Q7TQD2_29
Q7TQD2_55
Q7TQD2_56
Q7TSJ2_279
Q7TSJ2_282
Q7TSJ2_435
Q80TZ3_277
Q8BG05_9
Q8BG05_16
Q8BG75_300
Q8BH95_54
Q8BUV3_16
Q8CAQ8_465
Q8CC35_668
Q8CHH9_422
Q8CHH9_84
Q8CHT6_260
Q8K0T0_237
Q8K0T0_375
Q8K0T0_201
Q8K183_292
Q8K183_269
Q8K202_430
Q8K202_439
Q8K310_407
Q8VDQ8_57
Q8VEK3_551
Q8VEM8_184
Q8VIJ6_528
Q91V41_201
Q91VW3_47
Q91WD5_96
Q99JY9_374
Q99KI0_564
Q99KI0_84
Q99KI0_424
Q99KJ8_319
Q99LX0_48
Q99PT1_49
Q9CPQ1_13
Q9CQ69_25
Q9CQV8_43
Q9CR62_158
Q9CR68_196
Q9CZ13_415
Q9D051_49
Q9D6J6_153
Q9D6M3_273
Q9D6M3_44
Q9DB77_172
Q9DB77_217
Q9DB77_301
Q9DBG3_127
Q9DBJ1_240
Q9DCT2_230
Q9DCW4_106
Q9DCX2_111
Q9ERD7_86
Q9JHU4_134
Q9JIS5_136
Q9JJV2_56
Q9JKK7_159
Q9QXS6_384
Q9QXV0_92
Q9QXV0_104
Q9QYC0_507
Q9QYR6_168
Q9QYR6_2390
Q9R0K7_767
Q9R0K7_249
Q9R0K7_625
Q9R0P5_81
Q9R0P9_153
Q9R1P4_51
Q9R1V6_827
Q9R257_152
Q9WTT4_48
Q9WTT4_90
Q9WTT4_107
Q9WTX5_154
Q9WUA3_309
Q9WUK2_191
Q9Z1G4_49
Q9Z1S5_255
B9EKR1_455
D3YVF0_279
O08553_557
O08599_467
O55131_424
O88935_556
P05063_43
P06745_96
P08752_67
P14148_258
P16546_439
P16546_1237
P17742_69
P20357_51
P27773_207
P42669_198
P46460_533
P50518_80
P56480_345
P56480_109
P63260_256
P60761_53
P60879_8
P62259_19
P62814_208
P62881_86
P63318_638
P68372_86
P84089_13
Q04447_130
Q61644_341
Q6PIE5_493
Q8C8R3_308
Q8CAQ8_546
Q8CAQ8_409
Q8CC35_564
Q8K2B3_476
Q8K310_231
Q99KI0_474
Q99KI0_58
Q99N28_176
Q9CQQ7_171
Q9D8Y0_77
Q9JHU4_1817
Q9JIS5_141
Q9JLZ3_244
B9EKR1_447
O88342_330
P04370_249
P08249_191
P08553_425
P0DP28_87
P14873_1845
P15105_357
P16546_566
P16546_2064
P20917_582
P20917_88
P28740_201
P46460_337
P46660_177
P48962_259
P50396_35
P52480_455
P54227_14
P55012_221
P63260_177
P60879_142
P62806_37
P63011_151
P68372_241
P70404_381
Q03265_424
Q04447_96
Q60829_167
Q60930_264
Q61097_305
Q61644_266
Q62433_3
Q68FD5_1204
Q80YN3_613
Q8BWF0_400
Q8K0T0_273
Q8K1M6_61
Q8R3V5_251
Q8VEK3_566
Q91VD9_483
Q9CQQ7_208
Q9D6J6_142
Q9D8B7_303
Q9EQF6_231
Q9JHU4_1270
Q9JM96_35
Q9WUH7_708

## Sheet: Liver
Cit position	Protein
B5X0G2_140	B5X0G2
B5X0G2_174	O35459
B5X0G2_78	O35490
O35459_73	O35945
O35490_204	O88569
O35490_395	O88978
O35490_108	P00329
O35490_308	P02088
O35945_476	P05202
O88569_185	P07724
O88978_10	P08113
P00329_114	P09411
P00329_102	P10605
P02088_105	P11588
P05202_325	P11589
P05202_68	P11725
P07724_141	P12710
P08113_530	P13745
P08113_67	P14148
P09411_39	P14152
P10605_314	P15105
P11588_174	P15532
P11588_78	P16015
P11588_163	P16460
P11589_174	P16858
P11725_306	P17563
P12710_60	P17717
P13745_204	P17751
P13745_152	P18760
P14148_258	P19157
P14148_264	P20029
P14152_230	P24270
P15105_319	P24549
P15532_18	P25688
P15532_105	P26043
P16015_188	P26443
P16015_245	P27661
P16460_100	P27773
P16858_246	P30115
P16858_78	P32020
P17563_34	P33267
P17563_382	P34914
P17563_62	P35505
P17717_353	P35700
P17751_256	P38647
P18760_146	P41216
P19157_202	P45952
P19157_101	P49312
P19157_71	P50544
P19157_85	P51660
P20029_533	P52760
P20029_50	P54869
P20029_61	P56395
P20029_182	P56480
P24270_23	P58252
P24270_431	P63260
P24270_444	P62264
P24270_458	P62806
P24549_420	P62889
P25688_147	P63017
P26043_151	P63323
P26443_476	P68033
P26443_496	P97351
P26443_123	P97384
P27661_89	P97450
P27773_207	Q01853
P30115_45	Q05421
P32020_33	Q05920
P33267_262	Q5SX39
P33267_250	Q60692
P33267_358	Q61176
P34914_194	Q64374
P34914_103	Q64458
P35505_95	Q6ZWV3
P35700_110	Q8BWT1
P38647_107	Q8C196
P41216_627	Q8CAY6
P45952_294	Q8K202
P49312_122	Q8K2B3
P50544_633	Q8R086
P51660_199	Q8R0Y6
P52760_29	Q8R164
P54869_467	Q8VC30
P56395_52	Q921H8
P56480_422	Q8VCT4
P56480_109	Q8VCW8
P56480_241	Q8VDD5
P58252_449	Q8VEK3
P58252_767	Q91W64
P63260_95	Q91WS4
P62264_117	Q91WU0
P62806_36	Q91X83
P62889_56	Q91Y97
P63017_36	Q921I1
P63323_45	Q923D2
P68033_97	Q99KI0
P97351_162	Q99LC5
P97384_334	Q99LX0
P97450_73	Q99P30
Q01853_210	Q99PT1
Q01853_487	Q9CQ62
Q05421_75	Q9CQ69
Q05920_288	Q9CQQ7
Q5SX39_1884	Q9CR68
Q5SX39_698	Q9D0F9
Q60692_78	Q9DB77
Q61176_71	Q9DCN2
Q61176_92	Q9DCW4
Q64374_274	Q9EQ20
Q64458_357	Q9QXD6
Q6ZWV3_128	Q9R0H0
Q8BWT1_181	Q9R0P5
Q8BWT1_189	Q9R1P4
Q8BWT1_224	Q9WTP6
Q8BWT1_90	Q9Z2I4
Q8C196_929	O35215
Q8C196_1259	P11679
Q8C196_112	P48758
Q8C196_328	P52196
Q8C196_286	P55264
Q8C196_1085	P56654
Q8C196_1089	P68372
Q8C196_1292	P97872
Q8CAY6_361	Q3UPL0
Q8K202_430	Q8BG75
Q8K202_439	Q8BH95
Q8K2B3_476	Q8R0F9
Q8R086_269	Q91WD5
Q8R0Y6_742	Q9D8N0
Q8R0Y6_756	Q9DBJ1
Q8R0Y6_191	Q9EQF5
Q8R164_249	Q9JLJ2
Q8R164_55	Q9QXF8
Q8VC30_410	P09103
Q8VC30_152	P10126
Q921H8_249	P10649
Q8VCT4_536	P14115
Q8VCW8_290	P60843
Q8VDD5_1888	P63325
Q8VEK3_566	Q03265
Q91W64_356	Q61767
Q91WS4_335	Q9Z2X1
Q91WU0_458
Q91X83_265
Q91Y97_43
Q91Y97_22
Q91Y97_56
Q921I1_251
Q921I1_610
Q923D2_39
Q923D2_56
Q99KI0_564
Q99LC5_249
Q99LX0_48
Q99P30_3
Q99PT1_49
Q9CQ62_119
Q9CQ69_25
Q9CQQ7_208
Q9CQQ7_171
Q9CR68_196
Q9D0F9_23
Q9DB77_172
Q9DB77_217
Q9DB77_301
Q9DCN2_219
Q9DCW4_106
Q9DCW4_233
Q9EQ20_316
Q9QXD6_230
Q9R0H0_509
Q9R0P5_81
Q9R1P4_51
Q9WTP6_186
Q9WTP6_202
Q9Z2I4_674
O35215_75
P11679_334
P48758_134
P52196_249
P55264_148
P56654_357
P68372_2
P97872_277
Q3UPL0_1168
Q61176_255
Q8BG75_300
Q8BH95_54
Q8R0F9_275
Q8R0Y6_551
Q91WD5_96
Q91X83_250
Q9D8N0_45
Q9DBJ1_240
Q9EQF5_443
Q9JLJ2_223
Q9QXF8_230
O35490_318
O35490_361
P08113_51
P09103_215
P10126_423
P10649_43
P14115_65
P15105_341
P16460_95
P17563_276
P60843_311
P62264_84
P63017_236
P63325_153
Q03265_231
Q61767_94
Q9DCN2_226
Q9EQ20_70
Q9Z2X1_212

## Sheet: Heart
Cit position	Protein
A2ASS6_24001	A2ASS6
A2ASS6_4171	O09161
A2ASS6_467	O35129
A2ASS6_19180	O35459
O09161_48	O55143
O35129_111	O70468
O35459_73	O88569
O55143_666	O88990
O55143_246	P02088
O55143_505	P04247
O55143_365	P05063
O70468_966	P05064
O70468_213	P05202
O88569_185	P07310
O88990_463	P07724
O88990_59	P08249
P02088_105	P08553
P04247_140	P09542
P04247_119	P11087
P05063_201	P12787
P05064_134	P14152
P05064_173	P15532
P05064_56	P16125
P05064_331	P16858
P05064_43	P17751
P05202_325	P19123
P05202_68	P19157
P05202_81	P21107
P07310_96	P23927
P07310_341	P27661
P07724_141	P31001
P08249_191	P38647
P08553_380	P41216
P09542_103	P45952
P09542_90	P46735
P11087_1055	P48787
P12787_94	P48962
P14152_230	P49312
P15532_18	P50462
P16125_318	P50544
P16125_158	P50752
P16858_246	P51667
P16858_78	P54071
P17751_256	P56480
P19123_147	P58771
P19157_202	P63260
P21107_92	P62737
P21107_102	P68033
P21107_106	P68372
P23927_107	P97384
P27661_89	P97450
P31001_188	Q02566
P38647_107	Q03265
P41216_627	Q07417
P45952_294	Q3UYH7
P46735_159	Q5SX39
P48787_187	Q60597
P48962_259	Q60675
P48962_152	Q60931
P49312_122	Q60932
P50462_100	Q64331
P50462_41	Q6P8J7
P50462_28	Q7TMF3
P50544_616	Q8BH95
P50544_633	Q8BM75
P50752_243	Q8BMS1
P50752_126	Q8BWT1
P51667_40	Q8CAQ8
P51667_129	Q8K2B3
P51667_50	Q8VEM8
P54071_89	Q91WD5
P56480_422	Q91Z83
P56480_345	Q921I1
P56480_109	Q99KI0
P56480_241	Q99LC5
P58771_90	Q99LX0
P58771_91	Q9CPP6
P58771_21	Q9CPQ1
P63260_95	Q9CQ62
P63260_254	Q9CQ69
P62737_258	Q9CQQ7
P68033_97	Q9CQX8
P68372_2	Q9CR62
P97384_334	Q9CR68
P97450_54	Q9CZ13
P97450_73	Q9D6R2
Q02566_1195	Q9D8B4
Q02566_1678	Q9DB77
Q02566_1679	Q9DCJ5
Q02566_1305	Q9DCT2
Q02566_23	Q9DCW4
Q02566_29	Q9DCX2
Q02566_654	Q9JI91
Q02566_1214	Q9JJW5
Q02566_1346	Q9QYR9
Q02566_1422	Q9WUB3
Q02566_741	Q9Z1P6
Q02566_696	O08717
Q02566_1636	P02463
Q02566_1319	P03911
Q02566_1608	P06151
Q02566_1339	P14148
Q02566_370	P14602
Q02566_1178	P20029
Q02566_1834	P47857
Q02566_1882	P52480
Q02566_147	P58252
Q02566_169	P63017
Q02566_1279	Q05793
Q02566_17	Q7TQ48
Q02566_1262	Q8BG75
Q02566_1911	Q91VD9
Q02566_1822	Q9D0F9
Q02566_1384	Q9D0M3
Q02566_725	Q9D6J6
Q03265_527	Q9EQ20
Q03265_405	Q9QVP4
Q03265_186	Q9R0P5
Q03265_231	Q9R0Y5
Q07417_42	P06745
Q3UYH7_158	P11531
Q5SX39_1800	P26883
Q60597_1008	P56391
Q60597_883	Q03734
Q60675_75	Q3TEI4
Q60675_80	Q3UHX9
Q60931_252	Q60930
Q60932_133	Q61292
Q60932_176	Q68FD5
Q64331_199	Q8R4G6
Q6P8J7_243	Q9CWU5
Q6P8J7_220	Q9D051
Q7TMF3_9
Q8BH95_54
Q8BM75_948
Q8BMS1_125
Q8BWT1_189
Q8BWT1_224
Q8CAQ8_546
Q8CAQ8_409
Q8CAQ8_365
Q8K2B3_476
Q8VEM8_196
Q8VEM8_184
Q91WD5_96
Q91Z83_1677
Q921I1_251
Q921I1_610
Q99KI0_555
Q99KI0_564
Q99KI0_607
Q99KI0_84
Q99KI0_474
Q99KI0_424
Q99LC5_249
Q99LX0_48
Q9CPP6_23
Q9CPQ1_13
Q9CQ62_119
Q9CQ69_25
Q9CQQ7_171
Q9CQX8_98
Q9CQX8_27
Q9CR62_158
Q9CR68_196
Q9CZ13_415
Q9D6R2_115
Q9D8B4_20
Q9DB77_70
Q9DB77_84
Q9DB77_172
Q9DB77_217
Q9DB77_301
Q9DCJ5_147
Q9DCT2_230
Q9DCW4_106
Q9DCW4_233
Q9DCX2_111
Q9JI91_353
Q9JI91_243
Q9JI91_281
Q9JJW5_91
Q9QYR9_137
Q9WUB3_520
Q9WUB3_458
Q9Z1P6_34
A2ASS6_34003
O08717_89
O70468_941
O88990_73
P02463_1495
P03911_432
P05202_180
P06151_157
P07310_292
P07724_34
P12787_127
P14148_264
P14602_131
P20029_307
P20029_61
P20029_182
P47857_129
P52480_32
P58252_449
P58252_767
P62737_179
P63017_36
Q02566_1374
Q02566_1291
Q02566_906
Q03265_424
Q05793_660
Q60597_637
Q7TQ48_496
Q8BG75_300
Q8BWT1_181
Q91VD9_483
Q921I1_239
Q921I1_264
Q99KI0_774
Q99KI0_58
Q9CQQ7_196
Q9CQQ7_208
Q9CZ13_222
Q9D0F9_23
Q9D0M3_167
Q9D0M3_186
Q9D6J6_153
Q9D6J6_87
Q9EQ20_316
Q9QVP4_48
Q9R0P5_81
Q9R0Y5_149
A2ASS6_19790
O70468_968
P06745_96
P11531_2669
P14148_258
P16858_198
P26883_19
P31001_179
P31001_200
P50752_97
P56391_20
Q02566_190
Q03734_253
Q3TEI4_5
Q3UHX9_48
Q60930_264
Q61292_1695
Q68FD5_437
Q8R4G6_56
Q8R4G6_66
Q9CWU5_125
Q9D051_49

## Sheet: Lung
Cit position	Protein
E9Q8I9_1937	E9Q8I9
O08553_268	O08553
O08638_809	O08638
O35566_133	O35566
O35945_476	O35945
O54931_263	O54931
O88569_185	O88569
O88990_463	O88990
P02088_105	P02088
P02088_41	P02463
P02463_1495	P05063
P05063_201	P05064
P05064_173	P05213
P05064_56	P07724
P05064_43	P08074
P05213_229	P0CW02
P07724_141	P10107
P07724_34	P11087
P08074_173	P13745
P08074_120	P14148
P0CW02_72	P15532
P10107_97	P16110
P11087_1055	P16546
P13745_152	P17563
P14148_258	P18760
P14148_264	P19157
P15532_18	P20029
P16110_238	P20152
P16546_627	P21107
P17563_276	P24549
P18760_146	P26039
P19157_202	P26041
P20029_61	P26883
P20029_182	P27661
P20152_304	P31725
P20152_23	P40936
P20152_159	P48678
P20152_450	P49312
P21107_102	P49817
P24549_420	P50285
P26039_889	P56480
P26039_1919	P58252
P26039_1184	P58771
P26039_2455	P63260
P26041_533	P62259
P26041_393	P62806
P26041_570	P63017
P26883_19	P63158
P27661_89	P68033
P31725_25	P68372
P40936_122	P97315
P48678_166	P97384
P49312_122	P97447
P49817_19	Q02566
P50285_280	Q05793
P56480_422	Q3UHX9
P56480_241	Q61879
P58252_449	Q62009
P58252_767	Q62261
P58771_90	Q62465
P63260_95	Q63918
P63260_254	Q64727
P62259_141	Q6URW6
P62806_37	Q7TPR4
P63017_36	Q8BG75
P63158_110	Q8BXK9
P68033_97	Q8CIB5
P68372_2	Q8K202
P97315_99	Q8VCT4
P97384_334	Q8VDD5
P97447_44	Q921I1
Q02566_1195	Q923D2
Q02566_696	Q99KI0
Q02566_1339	Q99LX0
Q02566_1882	Q99PT1
Q05793_660	Q9CQQ7
Q3UHX9_48	Q9CWU5
Q61879_1710	Q9JHL1
Q61879_700	Q9JHU4
Q62009_230	Q9R069
Q62261_1834	Q9R0P5
Q62261_890	Q9R1P4
Q62465_370	Q9Z2I4
Q63918_151	Q9Z2X1
Q64727_547	P08553
Q64727_428	P16858
Q64727_538	P24270
Q6URW6_593	P26040
Q6URW6_968	P97351
Q7TPR4_614	Q01853
Q8BG75_300	Q8CHH9
Q8BXK9_109	Q9D7P7
Q8CIB5_424	P08122
Q8K202_430	P27773
Q8K202_439	Q3TEI4
Q8VCT4_536	Q60597
Q8VCT4_286	Q60932
Q8VDD5_1888	Q62151
Q921I1_610	Q68FD5
Q923D2_39	Q8BG05
Q923D2_56	Q9CQ69
Q99KI0_84
Q99LX0_48
Q99PT1_49
Q9CQQ7_171
Q9CWU5_125
Q9JHL1_156
Q9JHU4_134
Q9R069_224
Q9R0P5_145
Q9R0P5_81
Q9R1P4_51
Q9Z2I4_674
Q9Z2X1_206
Q9Z2X1_212
O08553_238
P05064_331
P05213_221
P08553_380
P16546_742
P16858_246
P20029_533
P20152_207
P21107_106
P24270_23
P24270_444
P26040_559
P58252_495
P62806_36
P68372_380
P97351_162
Q01853_210
Q02566_1214
Q02566_1422
Q62261_1844
Q64727_341
Q8CHH9_84
Q921I1_239
Q921I1_251
Q921I1_264
Q921I1_588
Q9D7P7_158
Q9JHL1_292
O08553_552
P05213_105
P08122_1535
P16546_839
P16546_1844
P16858_78
P17563_62
P20029_50
P26041_370
P27773_207
Q05793_812
Q3TEI4_5
Q60597_1008
Q60932_176
Q62151_115
Q64727_684
Q68FD5_437
Q8BG05_16
Q9CQ69_25

## Sheet: Kidney
Cit position	Protein
O35488_408	O35488
O88569_185	O88569
O88990_463	O88990
P00329_114	P00329
P02088_105	P02088
P05063_201	P05063
P05064_173	P05064
P05064_331	P05202
P05064_43	P07724
P05202_68	P11588
P07724_141	P14148
P11588_78	P14152
P14148_258	P15105
P14148_264	P15532
P14152_230	P16460
P15105_319	P16858
P15532_18	P17751
P15532_105	P18760
P16460_100	P18894
P16858_246	P19157
P16858_78	P20029
P17751_256	P21107
P18760_146	P24270
P18894_284	P26040
P18894_288	P26041
P19157_202	P26043
P20029_61	P26443
P20029_182	P27661
P21107_102	P38647
P24270_23	P45952
P24270_431	P49312
P24270_444	P50516
P24270_458	P50544
P26040_559	P51859
P26041_393	P52760
P26043_151	P56395
P26443_496	P56480
P27661_89	P58252
P38647_107	P63260
P45952_294	P62806
P49312_122	P62814
P50516_215	P63017
P50544_633	P68033
P51859_189	P68372
P52760_29	P97351
P56395_52	P97384
P56480_422	P97450
P56480_109	Q01853
P56480_241	Q03265
P58252_449	Q03734
P58252_767	Q05793
P63260_95	Q07417
P63260_254	Q3UHF7
P62806_37	Q3UHX9
P62814_82	Q3UNZ8
P63017_36	Q60597
P68033_97	Q60932
P68372_2	Q62433
P97351_162	Q62468
P97384_334	Q64436
P97450_73	Q68FD5
Q01853_487	Q6PIC6
Q03265_186	Q7TMF3
Q03265_231	Q7TNG8
Q03734_253	Q80VR2
Q05793_660	Q8BJ64
Q07417_42	Q8CAQ8
Q3UHF7_1696	Q8K0L3
Q3UHX9_48	Q8K2B3
Q3UNZ8_339	Q8R164
Q60597_1008	Q8VC30
Q60597_883	Q921H8
Q60932_133	Q8VDD5
Q60932_176	Q8VEM8
Q62433_56	Q91WU0
Q62468_138	Q91WV7
Q64436_394	Q91XE4
Q68FD5_437	Q91Y97
Q6PIC6_697	Q921I1
Q7TMF3_9	Q99KI0
Q7TNG8_431	Q99LX0
Q80VR2_13	Q99PT1
Q8BJ64_209	Q9CQ69
Q8CAQ8_546	Q9CQQ7
Q8CAQ8_409	Q9CR68
Q8K0L3_105	Q9CZ13
Q8K0L3_108	Q9DB77
Q8K2B3_476	Q9DC50
Q8R164_249	Q9DCJ5
Q8R164_55	Q9DCW4
Q8VC30_410	Q9EQ20
Q921H8_249	Q9JLJ2
Q8VDD5_1703	Q9QXD6
Q8VEM8_184	Q9R0H0
Q91WU0_458	Q9R0P5
Q91WV7_663	Q9WTP6
Q91XE4_255	Q9WUR9
Q91XE4_32	Q9Z2I4
Q91Y97_43	Q9Z2Y8
Q91Y97_22	O35459
Q91Y97_56	P06797
Q921I1_251	P08249
Q921I1_610	P09411
Q99KI0_564	P13745
Q99KI0_84	P16125
Q99KI0_474	P17563
Q99KI0_424	P47791
Q99LX0_48	P48758
Q99PT1_49	P52480
Q9CQ69_25	P60843
Q9CQQ7_171	P61922
Q9CR68_196	P62889
Q9CZ13_415	P70349
Q9DB77_70	P97449
Q9DB77_172	Q05920
Q9DC50_197	Q3ULD5
Q9DCJ5_147	Q60931
Q9DCW4_106	Q61879
Q9EQ20_316	Q8BWT1
Q9EQ20_70	Q99LC5
Q9JLJ2_223	Q9CQ62
Q9QXD6_230	Q9DBM2
Q9R0H0_509	Q9DCX2
Q9R0P5_81	Q9WVM8
Q9WTP6_186	P06745
Q9WUR9_41	P11930
Q9WUR9_188	P34914
Q9Z2I4_674	P63038
Q9Z2Y8_63	Q60692
O35459_73	Q8BG75
O35488_329	Q8BH95
P05064_56	Q8K202
P05202_81	Q99JY9
P06797_318	Q9CPQ1
P08249_191	Q9CR51
P09411_39	Q9D8E6
P13745_13	Q9DBJ1
P13745_204
P13745_152
P16125_318
P16125_158
P16460_95
P17563_276
P47791_159
P48758_134
P52480_32
P60843_311
P61922_310
P62806_36
P62889_56
P70349_119
P97449_218
Q03265_424
Q05920_288
Q3ULD5_268
Q60931_252
Q61879_700
Q64436_236
Q8BWT1_189
Q8BWT1_224
Q8VC30_152
Q99KI0_58
Q99LC5_249
Q9CQ62_119
Q9DB77_84
Q9DB77_217
Q9DB77_301
Q9DBM2_599
Q9DCX2_111
Q9WVM8_212
P06745_96
P11930_345
P20029_50
P24270_380
P34914_194
P34914_103
P50544_616
P56480_345
P58252_495
P63017_236
P63038_309
P97450_54
Q60692_78
Q7TNG8_450
Q8BG75_300
Q8BH95_54
Q8CAQ8_365
Q8K202_430
Q8K202_439
Q921H8_385
Q8VEM8_196
Q91WU0_536
Q91WU0_286
Q99JY9_374
Q9CPQ1_13
Q9CR51_78
Q9D8E6_45
Q9DBJ1_240
Q9EQ20_458
Q9R0H0_31
Q9R0H0_56

[truncated: 2 more sheets: Pancreas, Spleen]
